# Supplementary material for: The impact of earth-abundant metals as a replacement for Pd in cross coupling reactions
Source: Royal Society of Chemistry journal article supplement (doi:10.1039/d4sc00482e), 2024-01-01
Supplement: d4sc00482e1.xlsx [file d4sc00482e1.xlsx]

## Sheet: PMI-Org. Lett. 2013, 15, 3950.
	Source - Idea:
	PMI SUMMARY TABLE - PROCESS INCL. MAIN CHAIN											Overall Yield Main Chain:			0.76
	Step Name - Number (Main Chain)	Suzuki	0	0	0	0	0	0	0	0	0	0	0	0	0
	Mass Substrate (g or kg)	0.437017	0	0	0	0	0	0	0	0	0	0	0	0	0
	Mass Reagents (g or kg)	4.83088	0	0	0	0	0	0	0	0	0	0	0	0	0
	Mass Solvents (g or kg)	26.1037	0	0	0	0	0	0	0	0	0	0	0	0	0
	Mass Aqueous (g or kg)	3.10957	0	0	0	0	0	0	0	0	0	0	0	0	0
	Isolated amount of product (g or kg)	0.111	0	0	0	0	0	0	0	0	0	0	0	0	0
	Factor intermediate - substrate	0.253995	#DIV/0!	#DIV/0!	#DIV/0!	#DIV/0!	#DIV/0!	#DIV/0!	#DIV/0!	#DIV/0!	#DIV/0!	#DIV/0!	#DIV/0!	#DIV/0!	#DIV/0!
	Cumulated ratio current intermediate vs 1st intermediate	0.253995	#DIV/0!	#DIV/0!	#DIV/0!	#DIV/0!	#DIV/0!	#DIV/0!	#DIV/0!	#DIV/0!	#DIV/0!	#DIV/0!	#DIV/0!	#DIV/0!	#DIV/0!
	Step R-factor	47.4585	#DIV/0!	#DIV/0!	#DIV/0!	#DIV/0!	#DIV/0!	#DIV/0!	#DIV/0!	#DIV/0!	#DIV/0!	#DIV/0!	#DIV/0!	#DIV/0!	#DIV/0!
	Step PMI Substrate, Reagents, Solvents	282.627	#DIV/0!	#DIV/0!	#DIV/0!	#DIV/0!	#DIV/0!	#DIV/0!	#DIV/0!	#DIV/0!	#DIV/0!	#DIV/0!	#DIV/0!	#DIV/0!	#DIV/0!
	Step PMI Solvents	235.169	#DIV/0!	#DIV/0!	#DIV/0!	#DIV/0!	#DIV/0!	#DIV/0!	#DIV/0!	#DIV/0!	#DIV/0!	#DIV/0!	#DIV/0!	#DIV/0!	#DIV/0!
	Step PMI Aqueous	28.0142	#DIV/0!	#DIV/0!	#DIV/0!	#DIV/0!	#DIV/0!	#DIV/0!	#DIV/0!	#DIV/0!	#DIV/0!	#DIV/0!	#DIV/0!	#DIV/0!	#DIV/0!
	Step PMI	310.642	#DIV/0!	#DIV/0!	#DIV/0!	#DIV/0!	#DIV/0!	#DIV/0!	#DIV/0!	#DIV/0!	#DIV/0!	#DIV/0!	#DIV/0!	#DIV/0!	#DIV/0!
	Cumulative R-factor	60.5981	#DIV/0!	#DIV/0!	#DIV/0!	#DIV/0!	#DIV/0!	#DIV/0!	#DIV/0!	#DIV/0!	#DIV/0!	#DIV/0!	#DIV/0!	#DIV/0!	#DIV/0!
	Cumulative PMI Substrate, Reagents, Solvents	380.959	#DIV/0!	#DIV/0!	#DIV/0!	#DIV/0!	#DIV/0!	#DIV/0!	#DIV/0!	#DIV/0!	#DIV/0!	#DIV/0!	#DIV/0!	#DIV/0!	#DIV/0!
	Cumulative PMI Solvents	320.361	#DIV/0!	#DIV/0!	#DIV/0!	#DIV/0!	#DIV/0!	#DIV/0!	#DIV/0!	#DIV/0!	#DIV/0!	#DIV/0!	#DIV/0!	#DIV/0!	#DIV/0!
	Cumulative PMI Aqueous	151.413	#DIV/0!	#DIV/0!	#DIV/0!	#DIV/0!	#DIV/0!	#DIV/0!	#DIV/0!	#DIV/0!	#DIV/0!	#DIV/0!	#DIV/0!	#DIV/0!	#DIV/0!
	Cumulative PMI	532.372	#DIV/0!	#DIV/0!	#DIV/0!	#DIV/0!	#DIV/0!	#DIV/0!	#DIV/0!	#DIV/0!	#DIV/0!	#DIV/0!	#DIV/0!	#DIV/0!	#DIV/0!
	PMI SUMMARY - Side Chain 1											Overall Yield Side Chain 1:			0.8
	Step Name - Number	RB(OH)2	0	0	0	0	0	0	0	0	0
	Mass Substrate (g or kg)	8.15	0	0	0	0	0	0	0	0	0
	Mass Reagents (g or kg)	23.3882	0	0	0	0	0	0	0	0	0
	Mass Solvents (g or kg)	170.095	0	0	0	0	0	0	0	0	0
	Mass Aqueous (g or kg)	247.215	0	0	0	0	0	0	0	0	0
	Isolated amount of product (g or kg)	5.2	0	0	0	0	0	0	0	0	0
	Step R-factor	6.06504	#DIV/0!	#DIV/0!	#DIV/0!	#DIV/0!	#DIV/0!	#DIV/0!	#DIV/0!	#DIV/0!	#DIV/0!
	Step PMI Substrate, Reagents, Solvents	38.7755	#DIV/0!	#DIV/0!	#DIV/0!	#DIV/0!	#DIV/0!	#DIV/0!	#DIV/0!	#DIV/0!	#DIV/0!
	Step PMI Solvents	32.7105	#DIV/0!	#DIV/0!	#DIV/0!	#DIV/0!	#DIV/0!	#DIV/0!	#DIV/0!	#DIV/0!	#DIV/0!
	Step PMI Aqueous	47.5414	#DIV/0!	#DIV/0!	#DIV/0!	#DIV/0!	#DIV/0!	#DIV/0!	#DIV/0!	#DIV/0!	#DIV/0!
	Step PMI	86.3169	#DIV/0!	#DIV/0!	#DIV/0!	#DIV/0!	#DIV/0!	#DIV/0!	#DIV/0!	#DIV/0!	#DIV/0!
	Cumulative R-factor	6.06504	#DIV/0!	#DIV/0!	#DIV/0!	#DIV/0!	#DIV/0!	#DIV/0!	#DIV/0!	#DIV/0!	#DIV/0!
	Cumulative PMI Substrate, Reagents, Solvents	38.7755	#DIV/0!	#DIV/0!	#DIV/0!	#DIV/0!	#DIV/0!	#DIV/0!	#DIV/0!	#DIV/0!	#DIV/0!
	Cumulative PMI Solvents	32.7105	#DIV/0!	#DIV/0!	#DIV/0!	#DIV/0!	#DIV/0!	#DIV/0!	#DIV/0!	#DIV/0!	#DIV/0!
	Cumulative PMI Aqueous	47.5414	#DIV/0!	#DIV/0!	#DIV/0!	#DIV/0!	#DIV/0!	#DIV/0!	#DIV/0!	#DIV/0!	#DIV/0!
	Cumulative PMI	86.3169	#DIV/0!	#DIV/0!	#DIV/0!	#DIV/0!	#DIV/0!	#DIV/0!	#DIV/0!	#DIV/0!	#DIV/0!
	PMI SUMMARY - Side Chain 2											Overall Yield Side Chain 2:			0.836
	Step Name - Number	Ni Cat.	0	0	0	0	0	0	0	0	0
	Mass Substrate (g or kg)	0.55	0	0	0	0	0	0	0	0	0
	Mass Reagents (g or kg)	1.4	0	0	0	0	0	0	0	0	0
	Mass Solvents (g or kg)	11.85	0	0	0	0	0	0	0	0	0
	Mass Aqueous (g or kg)	5	0	0	0	0	0	0	0	0	0
	Isolated amount of product (g or kg)	1.63	0	0	0	0	0	0	0	0	0
	Step R-factor	1.19632	#DIV/0!	#DIV/0!	#DIV/0!	#DIV/0!	#DIV/0!	#DIV/0!	#DIV/0!	#DIV/0!	#DIV/0!
	Step PMI Substrate, Reagents, Solvents	8.46626	#DIV/0!	#DIV/0!	#DIV/0!	#DIV/0!	#DIV/0!	#DIV/0!	#DIV/0!	#DIV/0!	#DIV/0!
	Step PMI Solvents	7.26994	#DIV/0!	#DIV/0!	#DIV/0!	#DIV/0!	#DIV/0!	#DIV/0!	#DIV/0!	#DIV/0!	#DIV/0!
	Step PMI Aqueous	3.06748	#DIV/0!	#DIV/0!	#DIV/0!	#DIV/0!	#DIV/0!	#DIV/0!	#DIV/0!	#DIV/0!	#DIV/0!
	Step PMI	11.5337	#DIV/0!	#DIV/0!	#DIV/0!	#DIV/0!	#DIV/0!	#DIV/0!	#DIV/0!	#DIV/0!	#DIV/0!
	Cumulative R-factor	1.19632	#DIV/0!	#DIV/0!	#DIV/0!	#DIV/0!	#DIV/0!	#DIV/0!	#DIV/0!	#DIV/0!	#DIV/0!
	Cumulative PMI Substrate, Reagents, Solvents	8.46626	#DIV/0!	#DIV/0!	#DIV/0!	#DIV/0!	#DIV/0!	#DIV/0!	#DIV/0!	#DIV/0!	#DIV/0!
	Cumulative PMI Solvents	7.26994	#DIV/0!	#DIV/0!	#DIV/0!	#DIV/0!	#DIV/0!	#DIV/0!	#DIV/0!	#DIV/0!	#DIV/0!
	Cumulative PMI Aqueous	3.06748	#DIV/0!	#DIV/0!	#DIV/0!	#DIV/0!	#DIV/0!	#DIV/0!	#DIV/0!	#DIV/0!	#DIV/0!
	Cumulative PMI	11.5337	#DIV/0!	#DIV/0!	#DIV/0!	#DIV/0!	#DIV/0!	#DIV/0!	#DIV/0!	#DIV/0!	#DIV/0!

## Sheet: Metrics template - main chain
	Step Function, Name-Number: MAIN CHAIN		Suzuki		Inherited factors from side chains
		Value	Units		R-factor	Solvents	Aqueous
	Substrate (amount added, batch size)	0.143091	g
	Substrate (assay)	1	wt%
	Substrate (actual amount)	0.143091	g
	Molar Yield	0.76
	Product-Intermediate product (amount obtained, batch yield by weight)	0.111	g
	Product-Intermediate product (assay)	1	wt%
	Actual amount of product-intermediate product	0.111	g
	Raw Materials	Physical Charge	Units
	Substrates (as 100%)
	5-Bromopyrimidine; CAS 4595-59-9	0.143091	g
	Thiophene-3-boronic acid; CAS 6165-69-1	0.287712	g		6.06504	32.7105	47.5414
	NiCl2(PCy3)2; CAS 19999-87-2	0.00621414	g		1.19632	7.26994	3.06748
			g
			g
	Reagents (as 100%)
	K3PO4; Reaction	0.8597	g
			g
	HCl; Reaction quench; from 1 M HCl	0.072916	g
			g
	NaCl; Extraction; from brine wash of org. phases	0.355162	g
			g
	MgSO4; Extraction; assumed to be 5 wt.-% of EtOAc portion	0.213097	g
			g
	SiO2; Purification; assumed to be 3000 wt.-% of isolated product	3.33	g
			g
			g
	Total mass of substrates and reagents	5.26789	g
	Solvents, incl. diluents of substrates
	tert-Amylalcohol; Reaction; used as footprint is lower and yield is similar to MeTHF	1.2225	g
			g
	EtOAc; Extraction; assumed to be 1.5 mL of solvent per mmol of the coupling partners	4.26195	g
			g
	EtOAc; Extraction; assumed to be 300 wt.-% of amount MgSO4 assumed	0.639293	g
			g
	EtOAc; Purification; assumed to be 300 wt.-% of amount SiO2	9.99	g
	n-Hexanes; Purification; assumed to be 300 wt.-% of amount SiO2	9.99	g
			g
			g
			g
	... aqueous
	H2O; Reaction quench; from 1 M HCl	2.04408	g
			g
	H2O; Extraction; from brine wash of org. phases; assumed to be 30 wt.-% of EtOAc added	1.06549	g
			g
			g
			g
			g
			g
	Total input material mass	34.4812	g
	PROCESS STEP METRICS
	Mass Substrate (kg or g)		0.437017
	Mass Reagents (kg or g)		4.83088
	Mass Solvents (kg or g)		26.1037
	Mass Aqueous (kg or g)		3.10957
	Step R-factor		47.4585										- 86% Yield in paper after filtration over silica plug. 10% Reduction upon column purification assumed = 76% - Brine assumed to be 25 wt.-% NaCl and 75 wt.-% H2O - Filtration over the silica plug was left out in favor of a column chrom. - Hexamethylbenzene (internal standard) was not considered!
	Step PMI Substrate, Reagents, Solvents		282.627
	Step PMI Solvents		235.169
	Step PMI Aqueous		28.0142
	Step PMI		310.642
	Cumulative R-factor		60.5981
	Cumulative PMI Substrate, Reagents, Solvents		380.959
	Cumulative PMI Solvents		320.361
	Cumulative PMI Aqueous		151.413
	Cumulative PMI		532.372
	Step Function, Name-Number:
		Value	Units
	Substrate (amount added, batch size)		kg
	Substrate (assay)		wt%
	Substrate (actual amount)	0	kg
	Molar Yield (100% if this sheet is not populated)	1
	Product-Intermediate product (amount obtained, batch yield by weight)		kg
	Product-Intermediate product (assay)		wt%
	Actual amount of product-intermediate product	0	kg
	Raw Materials	Physical Charge	Units
	Substrates (as 100%) - if more than 2 substrates, add additional ones to reagents!
		0	kg
			kg
	Reagents (as 100%)
			kg
			kg
			kg
			kg
			kg
			kg
			kg
			kg
			kg
			kg
	Total mass of substrates and reagents	0	kg
	Solvents, incl. diluents of substrates
			kg
			kg
			kg
			kg
			kg
			kg
			kg
			kg
	... aqueous
			kg
			kg
			kg
			kg
			kg
			kg
			kg
	Total input material mass	0	kg
	PROCESS STEP METRICS
	Mass Substrate (kg or g)		0
	Mass Reagents (kg or g)		0		Isolated?	Purity in percent?
	Mass Solvents (kg or g)		0
	Mass Aqueous (kg or g)		0		fill in ↑	fill in ↑
	Step R-factor		#DIV/0!			Batch No (PO) or Experiment Number
	Step PMI Substrate, Reagents, Solvents		#DIV/0!
	Step PMI Solvents		#DIV/0!		fill in ↑
	Step PMI Aqueous		#DIV/0!
	Step PMI		#DIV/0!		Insert comments here ...
	Cumulative R-factor		#DIV/0!
	Cumulative PMI Substrate, Reagents, Solvents		#DIV/0!
	Cumulative PMI Solvents		#DIV/0!
	Cumulative PMI Aqueous		#DIV/0!
	Cumulative PMI		#DIV/0!
	Number of chem. trans.; "0" for distillation, column, filtration, salting out, etc.:
	Intern or extern manufacturing:
	Technologies used in this sheet:				Inherited factors from side chains
					R-factor	Solvents	Aqueous
		fill in - drop down	fill in
	Step Function, Name-Number:
		Value	Units
	Substrate (amount added, batch size)		kg
	Substrate (assay)		wt%
	Substrate (actual amount)	0	kg
	Molar Yield (100% if this sheet is not populated)	1
	Product-Intermediate product (amount obtained, batch yield by weight)		kg
	Product-Intermediate product (assay)		wt%
	Actual amount of product-intermediate product	0	kg
	Raw Materials	Physical Charge	Units
	Substrates (as 100%) - if more than 2 substrates, add additional ones to reagents!
		0	kg
			kg
	Reagents (as 100%)
			kg
			kg
			kg
			kg
			kg
			kg
			kg
			kg
			kg
			kg
	Total mass of substrates and reagents	0	kg
	Solvents, incl. diluents of substrates
			kg
			kg
			kg
			kg
			kg
			kg
			kg
			kg
	... aqueous
			kg
			kg
			kg
			kg
			kg
			kg
			kg
	Total input material mass	0	kg
	PROCESS STEP METRICS
	Mass Substrate (kg or g)		0
	Mass Reagents (kg or g)		0		Isolated?	Purity in percent?
	Mass Solvents (kg or g)		0
	Mass Aqueous (kg or g)		0		fill in ↑	fill in ↑
	Step R-factor		#DIV/0!			Batch No (PO) or Experiment Number
	Step PMI Substrate, Reagents, Solvents		#DIV/0!
	Step PMI Solvents		#DIV/0!		fill in ↑
	Step PMI Aqueous		#DIV/0!
	Step PMI		#DIV/0!		Insert comments here ...
	Cumulative R-factor		#DIV/0!
	Cumulative PMI Substrate, Reagents, Solvents		#DIV/0!
	Cumulative PMI Solvents		#DIV/0!
	Cumulative PMI Aqueous		#DIV/0!
	Cumulative PMI		#DIV/0!
	Number of chem. trans.; "0" for distillation, column, filtration, salting out, etc.:
	Intern or extern manufacturing:
	Technologies used in this sheet:				Inherited factors from side chains
					R-factor	Solvents	Aqueous
		fill in - drop down	fill in
	Step Function, Name-Number:
		Value	Units
	Substrate (amount added, batch size)		kg
	Substrate (assay)		wt%
	Substrate (actual amount)	0	kg
	Molar Yield (100% if this sheet is not populated)	1
	Product-Intermediate product (amount obtained, batch yield by weight)		kg
	Product-Intermediate product (assay)		wt%
	Actual amount of product-intermediate product	0	kg
	Raw Materials	Physical Charge	Units
	Substrates (as 100%) - if more than 2 substrates, add additional ones to reagents!
		0	kg
			kg
	Reagents (as 100%)
			kg
			kg
			kg
			kg
			kg
			kg
			kg
			kg
			kg
			kg
	Total mass of substrates and reagents	0	kg
	Solvents, incl. diluents of substrates
			kg
			kg
			kg
			kg
			kg
			kg
			kg
			kg
	... aqueous
			kg
			kg
			kg
			kg
			kg
			kg
			kg
	Total input material mass	0	kg
	PROCESS STEP METRICS
	Mass Substrate (kg or g)		0
	Mass Reagents (kg or g)		0		Isolated?	Purity in percent?
	Mass Solvents (kg or g)		0
	Mass Aqueous (kg or g)		0		fill in ↑	fill in ↑
	Step R-factor		#DIV/0!			Batch No (PO) or Experiment Number
	Step PMI Substrate, Reagents, Solvents		#DIV/0!
	Step PMI Solvents		#DIV/0!		fill in ↑
	Step PMI Aqueous		#DIV/0!
	Step PMI		#DIV/0!		Insert comments here ...
	Cumulative R-factor		#DIV/0!
	Cumulative PMI Substrate, Reagents, Solvents		#DIV/0!
	Cumulative PMI Solvents		#DIV/0!
	Cumulative PMI Aqueous		#DIV/0!
	Cumulative PMI		#DIV/0!
	Number of chem. trans.; "0" for distillation, column, filtration, salting out, etc.:
	Intern or extern manufacturing:
	Technologies used in this sheet:				Inherited factors from side chains
					R-factor	Solvents	Aqueous
		fill in - drop down	fill in
	Step Function, Name-Number:
		Value	Units
	Substrate (amount added, batch size)		kg
	Substrate (assay)		wt%
	Substrate (actual amount)	0	kg
	Molar Yield (100% if this sheet is not populated)	1
	Product-Intermediate product (amount obtained, batch yield by weight)		kg
	Product-Intermediate product (assay)		wt%
	Actual amount of product-intermediate product	0	kg
	Raw Materials	Physical Charge	Units
	Substrates (as 100%) - if more than 2 substrates, add additional ones to reagents!
		0	kg
			kg
	Reagents (as 100%)
			kg
			kg
			kg
			kg
			kg
			kg
			kg
			kg
			kg
			kg
	Total mass of substrates and reagents	0	kg
	Solvents, incl. diluents of substrates
			kg
			kg
			kg
			kg
			kg
			kg
			kg
			kg
	... aqueous
			kg
			kg
			kg
			kg
			kg
			kg
			kg
	Total input material mass	0	kg
	PROCESS STEP METRICS
	Mass Substrate (kg or g)		0
	Mass Reagents (kg or g)		0		Isolated?	Purity in percent?
	Mass Solvents (kg or g)		0
	Mass Aqueous (kg or g)		0		fill in ↑	fill in ↑
	Step R-factor		#DIV/0!			Batch No (PO) or Experiment Number
	Step PMI Substrate, Reagents, Solvents		#DIV/0!
	Step PMI Solvents		#DIV/0!		fill in ↑
	Step PMI Aqueous		#DIV/0!
	Step PMI		#DIV/0!		Insert comments here ...
	Cumulative R-factor		#DIV/0!
	Cumulative PMI Substrate, Reagents, Solvents		#DIV/0!
	Cumulative PMI Solvents		#DIV/0!
	Cumulative PMI Aqueous		#DIV/0!
	Cumulative PMI		#DIV/0!
	Number of chem. trans.; "0" for distillation, column, filtration, salting out, etc.:
	Intern or extern manufacturing:
	Technologies used in this sheet:				Inherited factors from side chains
					R-factor	Solvents	Aqueous
		fill in - drop down	fill in
	Step Function, Name-Number:
		Value	Units
	Substrate (amount added, batch size)		kg
	Substrate (assay)		wt%
	Substrate (actual amount)	0	kg
	Molar Yield (100% if this sheet is not populated)	1
	Product-Intermediate product (amount obtained, batch yield by weight)		kg
	Product-Intermediate product (assay)		wt%
	Actual amount of product-intermediate product	0	kg
	Raw Materials	Physical Charge	Units
	Substrates (as 100%) - if more than 2 substrates, add additional ones to reagents!
		0	kg
			kg
	Reagents (as 100%)
			kg
			kg
			kg
			kg
			kg
			kg
			kg
			kg
			kg
			kg
	Total mass of substrates and reagents	0	kg
	Solvents, incl. diluents of substrates
			kg
			kg
			kg
			kg
			kg
			kg
			kg
			kg
	... aqueous
			kg
			kg
			kg
			kg
			kg
			kg
			kg
	Total input material mass	0	kg
	PROCESS STEP METRICS
	Mass Substrate (kg or g)		0
	Mass Reagents (kg or g)		0		Isolated?	Purity in percent?
	Mass Solvents (kg or g)		0
	Mass Aqueous (kg or g)		0		fill in ↑	fill in ↑
	Step R-factor		#DIV/0!			Batch No (PO) or Experiment Number
	Step PMI Substrate, Reagents, Solvents		#DIV/0!
	Step PMI Solvents		#DIV/0!		fill in ↑
	Step PMI Aqueous		#DIV/0!
	Step PMI		#DIV/0!		Insert comments here ...
	Cumulative R-factor		#DIV/0!
	Cumulative PMI Substrate, Reagents, Solvents		#DIV/0!
	Cumulative PMI Solvents		#DIV/0!
	Cumulative PMI Aqueous		#DIV/0!
	Cumulative PMI		#DIV/0!
	Number of chem. trans.; "0" for distillation, column, filtration, salting out, etc.:
	Intern or extern manufacturing:
	Technologies used in this sheet:				Inherited factors from side chains
					R-factor	Solvents	Aqueous
		fill in - drop down	fill in
	Step Function, Name-Number:
		Value	Units
	Substrate (amount added, batch size)		kg
	Substrate (assay)		wt%
	Substrate (actual amount)	0	kg
	Molar Yield (100% if this sheet is not populated)	1
	Product-Intermediate product (amount obtained, batch yield by weight)		kg
	Product-Intermediate product (assay)		wt%
	Actual amount of product-intermediate product	0	kg
	Raw Materials	Physical Charge	Units
	Substrates (as 100%) - if more than 2 substrates, add additional ones to reagents!
		0	kg
			kg
	Reagents (as 100%)
			kg
			kg
			kg
			kg
			kg
			kg
			kg
			kg
			kg
			kg
	Total mass of substrates and reagents	0	kg
	Solvents, incl. diluents of substrates
			kg
			kg
			kg
			kg
			kg
			kg
			kg
			kg
	... aqueous
			kg
			kg
			kg
			kg
			kg
			kg
			kg
	Total input material mass	0	kg
	PROCESS STEP METRICS
	Mass Substrate (kg or g)		0
	Mass Reagents (kg or g)		0		Isolated?	Purity in percent?
	Mass Solvents (kg or g)		0
	Mass Aqueous (kg or g)		0		fill in ↑	fill in ↑
	Step R-factor		#DIV/0!			Batch No (PO) or Experiment Number
	Step PMI Substrate, Reagents, Solvents		#DIV/0!
	Step PMI Solvents		#DIV/0!		fill in ↑
	Step PMI Aqueous		#DIV/0!
	Step PMI		#DIV/0!		Insert comments here ...
	Cumulative R-factor		#DIV/0!
	Cumulative PMI Substrate, Reagents, Solvents		#DIV/0!
	Cumulative PMI Solvents		#DIV/0!
	Cumulative PMI Aqueous		#DIV/0!
	Cumulative PMI		#DIV/0!
	Number of chem. trans.; "0" for distillation, column, filtration, salting out, etc.:
	Intern or extern manufacturing:
	Technologies used in this sheet:				Inherited factors from side chains
					R-factor	Solvents	Aqueous
		fill in - drop down	fill in
	Step Function, Name-Number:
		Value	Units
	Substrate (amount added, batch size)		kg
	Substrate (assay)		wt%
	Substrate (actual amount)	0	kg
	Molar Yield (100% if this sheet is not populated)	1
	Product-Intermediate product (amount obtained, batch yield by weight)		kg
	Product-Intermediate product (assay)		wt%
	Actual amount of product-intermediate product	0	kg
	Raw Materials	Physical Charge	Units
	Substrates (as 100%) - if more than 2 substrates, add additional ones to reagents!
		0	kg
			kg
	Reagents (as 100%)
			kg
			kg
			kg
			kg
			kg
			kg
			kg
			kg
			kg
			kg
	Total mass of substrates and reagents	0	kg
	Solvents, incl. diluents of substrates
			kg
			kg
			kg
			kg
			kg
			kg
			kg
			kg
	... aqueous
			kg
			kg
			kg
			kg
			kg
			kg
			kg
	Total input material mass	0	kg
	PROCESS STEP METRICS
	Mass Substrate (kg or g)		0
	Mass Reagents (kg or g)		0		Isolated?	Purity in percent?
	Mass Solvents (kg or g)		0
	Mass Aqueous (kg or g)		0		fill in ↑	fill in ↑
	Step R-factor		#DIV/0!			Batch No (PO) or Experiment Number
	Step PMI Substrate, Reagents, Solvents		#DIV/0!
	Step PMI Solvents		#DIV/0!		fill in ↑
	Step PMI Aqueous		#DIV/0!
	Step PMI		#DIV/0!		Insert comments here ...
	Cumulative R-factor		#DIV/0!
	Cumulative PMI Substrate, Reagents, Solvents		#DIV/0!
	Cumulative PMI Solvents		#DIV/0!
	Cumulative PMI Aqueous		#DIV/0!
	Cumulative PMI		#DIV/0!
	Number of chem. trans.; "0" for distillation, column, filtration, salting out, etc.:
	Intern or extern manufacturing:
	Technologies used in this sheet:				Inherited factors from side chains
					R-factor	Solvents	Aqueous
		fill in - drop down	fill in
	Step Function, Name-Number:
		Value	Units
	Substrate (amount added, batch size)		kg
	Substrate (assay)		wt%
	Substrate (actual amount)	0	kg
	Molar Yield (100% if this sheet is not populated)	1
	Product-Intermediate product (amount obtained, batch yield by weight)		kg
	Product-Intermediate product (assay)		wt%
	Actual amount of product-intermediate product	0	kg
	Raw Materials	Physical Charge	Units
	Substrates (as 100%) - if more than 2 substrates, add additional ones to reagents!
		0	kg
			kg
	Reagents (as 100%)
			kg
			kg
			kg
			kg
			kg
			kg
			kg
			kg
			kg
			kg
	Total mass of substrates and reagents	0	kg
	Solvents, incl. diluents of substrates
			kg
			kg
			kg
			kg
			kg
			kg
			kg
			kg
	... aqueous
			kg
			kg
			kg
			kg
			kg
			kg
			kg
	Total input material mass	0	kg
	PROCESS STEP METRICS
	Mass Substrate (kg or g)		0
	Mass Reagents (kg or g)		0		Isolated?	Purity in percent?
	Mass Solvents (kg or g)		0
	Mass Aqueous (kg or g)		0		fill in ↑	fill in ↑
	Step R-factor		#DIV/0!			Batch No (PO) or Experiment Number
	Step PMI Substrate, Reagents, Solvents		#DIV/0!
	Step PMI Solvents		#DIV/0!		fill in ↑
	Step PMI Aqueous		#DIV/0!
	Step PMI		#DIV/0!		Insert comments here ...
	Cumulative R-factor		#DIV/0!
	Cumulative PMI Substrate, Reagents, Solvents		#DIV/0!
	Cumulative PMI Solvents		#DIV/0!
	Cumulative PMI Aqueous		#DIV/0!
	Cumulative PMI		#DIV/0!
	Number of chem. trans.; "0" for distillation, column, filtration, salting out, etc.:
	Intern or extern manufacturing:
	Technologies used in this sheet:				Inherited factors from side chains
					R-factor	Solvents	Aqueous
		fill in - drop down	fill in
	Step Function, Name-Number:
		Value	Units
	Substrate (amount added, batch size)		kg
	Substrate (assay)		wt%
	Substrate (actual amount)	0	kg
	Molar Yield (100% if this sheet is not populated)	1
	Product-Intermediate product (amount obtained, batch yield by weight)		kg
	Product-Intermediate product (assay)		wt%
	Actual amount of product-intermediate product	0	kg
	Raw Materials	Physical Charge	Units
	Substrates (as 100%) - if more than 2 substrates, add additional ones to reagents!
		0	kg
			kg
	Reagents (as 100%)
			kg
			kg
			kg
			kg
			kg
			kg
			kg
			kg
			kg
			kg
	Total mass of substrates and reagents	0	kg
	Solvents, incl. diluents of substrates
			kg
			kg
			kg
			kg
			kg
			kg
			kg
			kg
	... aqueous
			kg
			kg
			kg
			kg
			kg
			kg
			kg
	Total input material mass	0	kg
	PROCESS STEP METRICS
	Mass Substrate (kg or g)		0
	Mass Reagents (kg or g)		0		Isolated?	Purity in percent?
	Mass Solvents (kg or g)		0
	Mass Aqueous (kg or g)		0		fill in ↑	fill in ↑
	Step R-factor		#DIV/0!			Batch No (PO) or Experiment Number
	Step PMI Substrate, Reagents, Solvents		#DIV/0!
	Step PMI Solvents		#DIV/0!		fill in ↑
	Step PMI Aqueous		#DIV/0!
	Step PMI		#DIV/0!		Insert comments here ...
	Cumulative R-factor		#DIV/0!
	Cumulative PMI Substrate, Reagents, Solvents		#DIV/0!
	Cumulative PMI Solvents		#DIV/0!
	Cumulative PMI Aqueous		#DIV/0!
	Cumulative PMI		#DIV/0!
	Number of chem. trans.; "0" for distillation, column, filtration, salting out, etc.:
	Intern or extern manufacturing:
	Technologies used in this sheet:				Inherited factors from side chains
					R-factor	Solvents	Aqueous
		fill in - drop down	fill in
	Step Function, Name-Number:
		Value	Units
	Substrate (amount added, batch size)		kg
	Substrate (assay)		wt%
	Substrate (actual amount)	0	kg
	Molar Yield (100% if this sheet is not populated)	1
	Product-Intermediate product (amount obtained, batch yield by weight)		kg
	Product-Intermediate product (assay)		wt%
	Actual amount of product-intermediate product	0	kg
	Raw Materials	Physical Charge	Units
	Substrates (as 100%) - if more than 2 substrates, add additional ones to reagents!
		0	kg
			kg
	Reagents (as 100%)
			kg
			kg
			kg
			kg
			kg
			kg
			kg
			kg
			kg
			kg
	Total mass of substrates and reagents	0	kg
	Solvents, incl. diluents of substrates
			kg
			kg
			kg
			kg
			kg
			kg
			kg
			kg
	... aqueous
			kg
			kg
			kg
			kg
			kg
			kg
			kg
	Total input material mass	0	kg
	PROCESS STEP METRICS
	Mass Substrate (kg or g)		0
	Mass Reagents (kg or g)		0		Isolated?	Purity in percent?
	Mass Solvents (kg or g)		0
	Mass Aqueous (kg or g)		0		fill in ↑	fill in ↑
	Step R-factor		#DIV/0!			Batch No (PO) or Experiment Number
	Step PMI Substrate, Reagents, Solvents		#DIV/0!
	Step PMI Solvents		#DIV/0!		fill in ↑
	Step PMI Aqueous		#DIV/0!
	Step PMI		#DIV/0!		Insert comments here ...
	Cumulative R-factor		#DIV/0!
	Cumulative PMI Substrate, Reagents, Solvents		#DIV/0!
	Cumulative PMI Solvents		#DIV/0!
	Cumulative PMI Aqueous		#DIV/0!
	Cumulative PMI		#DIV/0!
	Number of chem. trans.; "0" for distillation, column, filtration, salting out, etc.:
	Intern or extern manufacturing:
	Technologies used in this sheet:				Inherited factors from side chains
					R-factor	Solvents	Aqueous
		fill in - drop down	fill in
	Step Function, Name-Number:
		Value	Units
	Substrate (amount added, batch size)		kg
	Substrate (assay)		wt%
	Substrate (actual amount)	0	kg
	Molar Yield (100% if this sheet is not populated)	1
	Product-Intermediate product (amount obtained, batch yield by weight)		kg
	Product-Intermediate product (assay)		wt%
	Actual amount of product-intermediate product	0	kg
	Raw Materials	Physical Charge	Units
	Substrates (as 100%) - if more than 2 substrates, add additional ones to reagents!
		0	kg
			kg
	Reagents (as 100%)
			kg
			kg
			kg
			kg
			kg
			kg
			kg
			kg
			kg
			kg
	Total mass of substrates and reagents	0	kg
	Solvents, incl. diluents of substrates
			kg
			kg
			kg
			kg
			kg
			kg
			kg
			kg
	... aqueous
			kg
			kg
			kg
			kg
			kg
			kg
			kg
	Total input material mass	0	kg
	PROCESS STEP METRICS
	Mass Substrate (kg or g)		0
	Mass Reagents (kg or g)		0		Isolated?	Purity in percent?
	Mass Solvents (kg or g)		0
	Mass Aqueous (kg or g)		0		fill in ↑	fill in ↑
	Step R-factor		#DIV/0!			Batch No (PO) or Experiment Number
	Step PMI Substrate, Reagents, Solvents		#DIV/0!
	Step PMI Solvents		#DIV/0!		fill in ↑
	Step PMI Aqueous		#DIV/0!
	Step PMI		#DIV/0!		Insert comments here ...
	Cumulative R-factor		#DIV/0!
	Cumulative PMI Substrate, Reagents, Solvents		#DIV/0!
	Cumulative PMI Solvents		#DIV/0!
	Cumulative PMI Aqueous		#DIV/0!
	Cumulative PMI		#DIV/0!
	Number of chem. trans.; "0" for distillation, column, filtration, salting out, etc.:
	Intern or extern manufacturing:
	Technologies used in this sheet:				Inherited factors from side chains
					R-factor	Solvents	Aqueous
		fill in - drop down	fill in
	Step Function, Name-Number:
		Value	Units
	Substrate (amount added, batch size)		kg
	Substrate (assay)		wt%
	Substrate (actual amount)	0	kg
	Molar Yield (100% if this sheet is not populated)	1
	Product-Intermediate product (amount obtained, batch yield by weight)		kg
	Product-Intermediate product (assay)		wt%
	Actual amount of product-intermediate product	0	kg
	Raw Materials	Physical Charge	Units
	Substrates (as 100%) - if more than 2 substrates, add additional ones to reagents!
		0	kg
			kg
	Reagents (as 100%)
			kg
			kg
			kg
			kg
			kg
			kg
			kg
			kg
			kg
			kg
	Total mass of substrates and reagents	0	kg
	Solvents, incl. diluents of substrates
			kg
			kg
			kg
			kg
			kg
			kg
			kg
			kg
	... aqueous
			kg
			kg
			kg
			kg
			kg
			kg
			kg
	Total input material mass	0	kg
	PROCESS STEP METRICS
	Mass Substrate (kg or g)		0
	Mass Reagents (kg or g)		0		Isolated?	Purity in percent?
	Mass Solvents (kg or g)		0
	Mass Aqueous (kg or g)		0		fill in ↑	fill in ↑
	Step R-factor		#DIV/0!			Batch No (PO) or Experiment Number
	Step PMI Substrate, Reagents, Solvents		#DIV/0!
	Step PMI Solvents		#DIV/0!		fill in ↑
	Step PMI Aqueous		#DIV/0!
	Step PMI		#DIV/0!		Insert comments here ...
	Cumulative R-factor		#DIV/0!
	Cumulative PMI Substrate, Reagents, Solvents		#DIV/0!
	Cumulative PMI Solvents		#DIV/0!
	Cumulative PMI Aqueous		#DIV/0!
	Cumulative PMI		#DIV/0!
	Number of chem. trans.; "0" for distillation, column, filtration, salting out, etc.:
	Intern or extern manufacturing:
	Technologies used in this sheet:				Inherited factors from side chains
					R-factor	Solvents	Aqueous
		fill in - drop down	fill in
	Step Function, Name-Number:
		Value	Units
	Substrate (amount added, batch size)		kg
	Substrate (assay)		wt%
	Substrate (actual amount)	0	kg
	Molar Yield (100% if this sheet is not populated)	1
	Product-Intermediate product (amount obtained, batch yield by weight)		kg
	Product-Intermediate product (assay)		wt%
	Actual amount of product-intermediate product	0	kg
	Raw Materials	Physical Charge	Units
	Substrates (as 100%) - if more than 2 substrates, add additional ones to reagents!
		0	kg
			kg
	Reagents (as 100%)
			kg
			kg
			kg
			kg
			kg
			kg
			kg
			kg
			kg
			kg
	Total mass of substrates and reagents	0	kg
	Solvents, incl. diluents of substrates
			kg
			kg
			kg
			kg
			kg
			kg
			kg
			kg
	... aqueous
			kg
			kg
			kg
			kg
			kg
			kg
			kg
	Total input material mass	0	kg
	PROCESS STEP METRICS
	Mass Substrate (kg or g)		0
	Mass Reagents (kg or g)		0		Isolated?	Purity in percent?
	Mass Solvents (kg or g)		0
	Mass Aqueous (kg or g)		0		fill in ↑	fill in ↑
	Step R-factor		#DIV/0!			Batch No (PO) or Experiment Number
	Step PMI Substrate, Reagents, Solvents		#DIV/0!
	Step PMI Solvents		#DIV/0!		fill in ↑
	Step PMI Aqueous		#DIV/0!
	Step PMI		#DIV/0!		Insert comments here ...
	Cumulative R-factor		#DIV/0!
	Cumulative PMI Substrate, Reagents, Solvents		#DIV/0!
	Cumulative PMI Solvents		#DIV/0!
	Cumulative PMI Aqueous		#DIV/0!
	Cumulative PMI		#DIV/0!
	Number of chem. trans.; "0" for distillation, column, filtration, salting out, etc.:
	Intern or extern manufacturing:
	Technologies used in this sheet:

## Sheet: Metrics template - side chain
	Step Function, Name-Number: SIDE CHAIN 1		RB(OH)2		Inherited factors from side chains
		Value	Units		R-factor	Solvents	Aqueous
	Substrate (amount added, batch size)	8.15	g
	Substrate (assay)	1	wt%
	Substrate (actual amount)	8.15	g
	Molar Yield	0.8
	Product-Intermediate product (amount obtained, batch yield by weight)	5.2	g
	Product-Intermediate product (assay)	1	wt%
	Actual amount of product-intermediate product	5.2	g
	Raw Materials	Physical Charge	Units
	Substrates (as 100%)
	3-Bromothiophene; CAS 872-31-1	8.15	g
			g
	Reagents (as 100%)
	n-BuLi; Pure n-BuLi from 2.5 M nBuLi in n-hexanes	3.20166	g										- It is assumed that the borate is diluted in 10 mL THF.
	Triisopropylborate; CAS 5419-55-6	9.403	g
			g
	HCl; Reaction quench; from 1 M HCl	3.6458	g
			g
	NaOH; Extraction; from 1 M NaOH	3.6	g
	HCl; Extraction; 2 mL HCl 36% assumed to set aq. phase to pH2	0.864	g
			g
	MgSO4; Extraction; assumed to be 5 wt.-% of 2nd Et2O portion	2.67375	g
			g
			g
	Total mass of substrates and reagents	31.5382	g
	Solvents, incl. diluents of substrates
	THF; Reaction	17.76	g
	n-Hexanes; Reaction; from 2.5 M n-BuLi solution	10.6583	g
	THF; Reaction; from B(OiPr)3 solution	8.88	g
			g
	Et2O; Extraction; assumed to be 50% of amount stated in protocol	124.775	g
	Et2O; Extraction; assumed to be 300 wt.-% of amount MgSO4 assumed	8.02125	g
			g
			g
	... aqueous
	H2O; Reaction quench; from 1 M HCl	102.204	g
			g
	H2O; Extraction; from 1 M NaOH	90	g
	H2O; Extraction; from 2 mL HCl 36%	1.536	g
	H2O; Extraction; from wash of org. phases; assumed to be 30 wt.-% of 2nd Et2O portion	53.475	g
			g
			g
			g
	Total input material mass	448.848	g
	PROCESS STEP METRICS
	Mass Substrate (kg or g)		8.15
	Mass Reagents (kg or g)		23.3882
	Mass Solvents (kg or g)		170.095
	Mass Aqueous (kg or g)		247.215
	Step R-factor		6.06504
	Step PMI Substrate, Reagents, Solvents		38.7755
	Step PMI Solvents		32.7105
	Step PMI Aqueous		47.5414
	Step PMI		86.3169
	Cumulative R-factor		6.06504
	Cumulative PMI Substrate, Reagents, Solvents		38.7755
	Cumulative PMI Solvents		32.7105
	Cumulative PMI Aqueous		47.5414
	Cumulative PMI		86.3169
		fill in - drop down	fill in
	Step Function, Name-Number:				Inherited factors from side chains
		Value	Units		R-factor	Solvents	Aqueous
	Substrate (amount added, batch size)		kg
	Substrate (assay)		wt%
	Substrate (actual amount)	0	kg
	Molar Yield (100% if this sheet is not populated)	1
	Product-Intermediate product (amount obtained, batch yield by weight)		kg
	Product-Intermediate product (assay)		wt%
	Actual amount of product-intermediate product	0	kg
	Raw Materials	Physical Charge	Units
	Substrates (as 100%) - if more than 2 substrates, add additional ones to reagents!
		0	kg
			kg
	Reagents (as 100%)
			kg
			kg
			kg
			kg
			kg
			kg
			kg
			kg
			kg
			kg
	Total mass of substrates and reagents	0	kg
	Solvents, incl. diluents of substrates
			kg
			kg
			kg
			kg
			kg
			kg
			kg
			kg
	... aqueous
			kg
			kg
			kg
			kg
			kg
			kg
			kg
	Total input material mass	0	kg
	PROCESS STEP METRICS
	Mass Substrate (kg or g)		0
	Mass Reagents (kg or g)		0
	Mass Solvents (kg or g)		0
	Mass Aqueous (kg or g)		0
	Step R-factor		#DIV/0!		Isolated?	Purity in percent?
	Step PMI Substrate, Reagents, Solvents		#DIV/0!
	Step PMI Solvents		#DIV/0!		fill in ↑	fill in ↑
	Step PMI Aqueous		#DIV/0!			Batch No (PO) or Experiment Number
	Step PMI		#DIV/0!
	Cumulative R-factor		#DIV/0!		fill in ↑
	Cumulative PMI Substrate, Reagents, Solvents		#DIV/0!
	Cumulative PMI Solvents		#DIV/0!		Insert comments here ...
	Cumulative PMI Aqueous		#DIV/0!
	Cumulative PMI		#DIV/0!
	Number of chem. trans.; "0" for distillation, column, filtration, salting out, etc.:
	Intern or extern manufacturing:
	Technologies used in this sheet:
		fill in - drop down	fill in
	Step Function, Name-Number:				Inherited factors from side chains
		Value	Units		R-factor	Solvents	Aqueous
	Substrate (amount added, batch size)		kg
	Substrate (assay)		wt%
	Substrate (actual amount)	0	kg
	Molar Yield (100% if this sheet is not populated)	1
	Product-Intermediate product (amount obtained, batch yield by weight)		kg
	Product-Intermediate product (assay)		wt%
	Actual amount of product-intermediate product	0	kg
	Raw Materials	Physical Charge	Units
	Substrates (as 100%) - if more than 2 substrates, add additional ones to reagents!
		0	kg
			kg
	Reagents (as 100%)
			kg
			kg
			kg
			kg
			kg
			kg
			kg
			kg
			kg
			kg
	Total mass of substrates and reagents	0	kg
	Solvents, incl. diluents of substrates
			kg
			kg
			kg
			kg
			kg
			kg
			kg
			kg
	... aqueous
			kg
			kg
			kg
			kg
			kg
			kg
			kg
	Total input material mass	0	kg
	PROCESS STEP METRICS
	Mass Substrate (kg or g)		0
	Mass Reagents (kg or g)		0
	Mass Solvents (kg or g)		0
	Mass Aqueous (kg or g)		0
	Step R-factor		#DIV/0!		Isolated?	Purity in percent?
	Step PMI Substrate, Reagents, Solvents		#DIV/0!
	Step PMI Solvents		#DIV/0!		fill in ↑	fill in ↑
	Step PMI Aqueous		#DIV/0!			Batch No (PO) or Experiment Number
	Step PMI		#DIV/0!
	Cumulative R-factor		#DIV/0!		fill in ↑
	Cumulative PMI Substrate, Reagents, Solvents		#DIV/0!
	Cumulative PMI Solvents		#DIV/0!		Insert comments here ...
	Cumulative PMI Aqueous		#DIV/0!
	Cumulative PMI		#DIV/0!
	Number of chem. trans.; "0" for distillation, column, filtration, salting out, etc.:
	Intern or extern manufacturing:
	Technologies used in this sheet:
		fill in - drop down	fill in
	Step Function, Name-Number:				Inherited factors from side chains
		Value	Units		R-factor	Solvents	Aqueous
	Substrate (amount added, batch size)		kg
	Substrate (assay)		wt%
	Substrate (actual amount)	0	kg
	Molar Yield (100% if this sheet is not populated)	1
	Product-Intermediate product (amount obtained, batch yield by weight)		kg
	Product-Intermediate product (assay)		wt%
	Actual amount of product-intermediate product	0	kg
	Raw Materials	Physical Charge	Units
	Substrates (as 100%) - if more than 2 substrates, add additional ones to reagents!
		0	kg
			kg
	Reagents (as 100%)
			kg
			kg
			kg
			kg
			kg
			kg
			kg
			kg
			kg
			kg
	Total mass of substrates and reagents	0	kg
	Solvents, incl. diluents of substrates
			kg
			kg
			kg
			kg
			kg
			kg
			kg
			kg
	... aqueous
			kg
			kg
			kg
			kg
			kg
			kg
			kg
	Total input material mass	0	kg
	PROCESS STEP METRICS
	Mass Substrate (kg or g)		0
	Mass Reagents (kg or g)		0
	Mass Solvents (kg or g)		0
	Mass Aqueous (kg or g)		0
	Step R-factor		#DIV/0!		Isolated?	Purity in percent?
	Step PMI Substrate, Reagents, Solvents		#DIV/0!
	Step PMI Solvents		#DIV/0!		fill in ↑	fill in ↑
	Step PMI Aqueous		#DIV/0!			Batch No (PO) or Experiment Number
	Step PMI		#DIV/0!
	Cumulative R-factor		#DIV/0!		fill in ↑
	Cumulative PMI Substrate, Reagents, Solvents		#DIV/0!
	Cumulative PMI Solvents		#DIV/0!		Insert comments here ...
	Cumulative PMI Aqueous		#DIV/0!
	Cumulative PMI		#DIV/0!
	Number of chem. trans.; "0" for distillation, column, filtration, salting out, etc.:
	Intern or extern manufacturing:
	Technologies used in this sheet:
		fill in - drop down	fill in
	Step Function, Name-Number:				Inherited factors from side chains
		Value	Units		R-factor	Solvents	Aqueous
	Substrate (amount added, batch size)		kg
	Substrate (assay)		wt%
	Substrate (actual amount)	0	kg
	Molar Yield (100% if this sheet is not populated)	1
	Product-Intermediate product (amount obtained, batch yield by weight)		kg
	Product-Intermediate product (assay)		wt%
	Actual amount of product-intermediate product	0	kg
	Raw Materials	Physical Charge	Units
	Substrates (as 100%) - if more than 2 substrates, add additional ones to reagents!
		0	kg
			kg
	Reagents (as 100%)
			kg
			kg
			kg
			kg
			kg
			kg
			kg
			kg
			kg
			kg
	Total mass of substrates and reagents	0	kg
	Solvents, incl. diluents of substrates
			kg
			kg
			kg
			kg
			kg
			kg
			kg
			kg
	... aqueous
			kg
			kg
			kg
			kg
			kg
			kg
			kg
	Total input material mass	0	kg
	PROCESS STEP METRICS
	Mass Substrate (kg or g)		0
	Mass Reagents (kg or g)		0
	Mass Solvents (kg or g)		0
	Mass Aqueous (kg or g)		0
	Step R-factor		#DIV/0!		Isolated?	Purity in percent?
	Step PMI Substrate, Reagents, Solvents		#DIV/0!
	Step PMI Solvents		#DIV/0!		fill in ↑	fill in ↑
	Step PMI Aqueous		#DIV/0!			Batch No (PO) or Experiment Number
	Step PMI		#DIV/0!
	Cumulative R-factor		#DIV/0!		fill in ↑
	Cumulative PMI Substrate, Reagents, Solvents		#DIV/0!
	Cumulative PMI Solvents		#DIV/0!		Insert comments here ...
	Cumulative PMI Aqueous		#DIV/0!
	Cumulative PMI		#DIV/0!
	Number of chem. trans.; "0" for distillation, column, filtration, salting out, etc.:
	Intern or extern manufacturing:
	Technologies used in this sheet:
		fill in - drop down	fill in
	Step Function, Name-Number:				Inherited factors from side chains
		Value	Units		R-factor	Solvents	Aqueous
	Substrate (amount added, batch size)		kg
	Substrate (assay)		wt%
	Substrate (actual amount)	0	kg
	Molar Yield (100% if this sheet is not populated)	1
	Product-Intermediate product (amount obtained, batch yield by weight)		kg
	Product-Intermediate product (assay)		wt%
	Actual amount of product-intermediate product	0	kg
	Raw Materials	Physical Charge	Units
	Substrates (as 100%) - if more than 2 substrates, add additional ones to reagents!
		0	kg
			kg
	Reagents (as 100%)
			kg
			kg
			kg
			kg
			kg
			kg
			kg
			kg
			kg
			kg
	Total mass of substrates and reagents	0	kg
	Solvents, incl. diluents of substrates
			kg
			kg
			kg
			kg
			kg
			kg
			kg
			kg
	... aqueous
			kg
			kg
			kg
			kg
			kg
			kg
			kg
	Total input material mass	0	kg
	PROCESS STEP METRICS
	Mass Substrate (kg or g)		0
	Mass Reagents (kg or g)		0
	Mass Solvents (kg or g)		0
	Mass Aqueous (kg or g)		0
	Step R-factor		#DIV/0!		Isolated?	Purity in percent?
	Step PMI Substrate, Reagents, Solvents		#DIV/0!
	Step PMI Solvents		#DIV/0!		fill in ↑	fill in ↑
	Step PMI Aqueous		#DIV/0!			Batch No (PO) or Experiment Number
	Step PMI		#DIV/0!
	Cumulative R-factor		#DIV/0!		fill in ↑
	Cumulative PMI Substrate, Reagents, Solvents		#DIV/0!
	Cumulative PMI Solvents		#DIV/0!		Insert comments here ...
	Cumulative PMI Aqueous		#DIV/0!
	Cumulative PMI		#DIV/0!
	Number of chem. trans.; "0" for distillation, column, filtration, salting out, etc.:
	Intern or extern manufacturing:
	Technologies used in this sheet:
		fill in - drop down	fill in
	Step Function, Name-Number:				Inherited factors from side chains
		Value	Units		R-factor	Solvents	Aqueous
	Substrate (amount added, batch size)		kg
	Substrate (assay)		wt%
	Substrate (actual amount)	0	kg
	Molar Yield (100% if this sheet is not populated)	1
	Product-Intermediate product (amount obtained, batch yield by weight)		kg
	Product-Intermediate product (assay)		wt%
	Actual amount of product-intermediate product	0	kg
	Raw Materials	Physical Charge	Units
	Substrates (as 100%) - if more than 2 substrates, add additional ones to reagents!
		0	kg
			kg
	Reagents (as 100%)
			kg
			kg
			kg
			kg
			kg
			kg
			kg
			kg
			kg
			kg
	Total mass of substrates and reagents	0	kg
	Solvents, incl. diluents of substrates
			kg
			kg
			kg
			kg
			kg
			kg
			kg
			kg
	... aqueous
			kg
			kg
			kg
			kg
			kg
			kg
			kg
	Total input material mass	0	kg
	PROCESS STEP METRICS
	Mass Substrate (kg or g)		0
	Mass Reagents (kg or g)		0
	Mass Solvents (kg or g)		0
	Mass Aqueous (kg or g)		0
	Step R-factor		#DIV/0!		Isolated?	Purity in percent?
	Step PMI Substrate, Reagents, Solvents		#DIV/0!
	Step PMI Solvents		#DIV/0!		fill in ↑	fill in ↑
	Step PMI Aqueous		#DIV/0!			Batch No (PO) or Experiment Number
	Step PMI		#DIV/0!
	Cumulative R-factor		#DIV/0!		fill in ↑
	Cumulative PMI Substrate, Reagents, Solvents		#DIV/0!
	Cumulative PMI Solvents		#DIV/0!		Insert comments here ...
	Cumulative PMI Aqueous		#DIV/0!
	Cumulative PMI		#DIV/0!
	Number of chem. trans.; "0" for distillation, column, filtration, salting out, etc.:
	Intern or extern manufacturing:
	Technologies used in this sheet:
		fill in - drop down	fill in
	Step Function, Name-Number:				Inherited factors from side chains
		Value	Units		R-factor	Solvents	Aqueous
	Substrate (amount added, batch size)		kg
	Substrate (assay)		wt%
	Substrate (actual amount)	0	kg
	Molar Yield (100% if this sheet is not populated)	1
	Product-Intermediate product (amount obtained, batch yield by weight)		kg
	Product-Intermediate product (assay)		wt%
	Actual amount of product-intermediate product	0	kg
	Raw Materials	Physical Charge	Units
	Substrates (as 100%) - if more than 2 substrates, add additional ones to reagents!
		0	kg
			kg
	Reagents (as 100%)
			kg
			kg
			kg
			kg
			kg
			kg
			kg
			kg
			kg
			kg
	Total mass of substrates and reagents	0	kg
	Solvents, incl. diluents of substrates
			kg
			kg
			kg
			kg
			kg
			kg
			kg
			kg
	... aqueous
			kg
			kg
			kg
			kg
			kg
			kg
			kg
	Total input material mass	0	kg
	PROCESS STEP METRICS
	Mass Substrate (kg or g)		0
	Mass Reagents (kg or g)		0
	Mass Solvents (kg or g)		0
	Mass Aqueous (kg or g)		0
	Step R-factor		#DIV/0!		Isolated?	Purity in percent?
	Step PMI Substrate, Reagents, Solvents		#DIV/0!
	Step PMI Solvents		#DIV/0!		fill in ↑	fill in ↑
	Step PMI Aqueous		#DIV/0!			Batch No (PO) or Experiment Number
	Step PMI		#DIV/0!
	Cumulative R-factor		#DIV/0!		fill in ↑
	Cumulative PMI Substrate, Reagents, Solvents		#DIV/0!
	Cumulative PMI Solvents		#DIV/0!		Insert comments here ...
	Cumulative PMI Aqueous		#DIV/0!
	Cumulative PMI		#DIV/0!
	Number of chem. trans.; "0" for distillation, column, filtration, salting out, etc.:
	Intern or extern manufacturing:
	Technologies used in this sheet:
		fill in - drop down	fill in
	Step Function, Name-Number:				Inherited factors from side chains
		Value	Units		R-factor	Solvents	Aqueous
	Substrate (amount added, batch size)		kg
	Substrate (assay)		wt%
	Substrate (actual amount)	0	kg
	Molar Yield (100% if this sheet is not populated)	1
	Product-Intermediate product (amount obtained, batch yield by weight)		kg
	Product-Intermediate product (assay)		wt%
	Actual amount of product-intermediate product	0	kg
	Raw Materials	Physical Charge	Units
	Substrates (as 100%) - if more than 2 substrates, add additional ones to reagents!
		0	kg
			kg
	Reagents (as 100%)
			kg
			kg
			kg
			kg
			kg
			kg
			kg
			kg
			kg
			kg
	Total mass of substrates and reagents	0	kg
	Solvents, incl. diluents of substrates
			kg
			kg
			kg
			kg
			kg
			kg
			kg
			kg
	... aqueous
			kg
			kg
			kg
			kg
			kg
			kg
			kg
	Total input material mass	0	kg
	PROCESS STEP METRICS
	Mass Substrate (kg or g)		0
	Mass Reagents (kg or g)		0
	Mass Solvents (kg or g)		0
	Mass Aqueous (kg or g)		0
	Step R-factor		#DIV/0!		Isolated?	Purity in percent?
	Step PMI Substrate, Reagents, Solvents		#DIV/0!
	Step PMI Solvents		#DIV/0!		fill in ↑	fill in ↑
	Step PMI Aqueous		#DIV/0!			Batch No (PO) or Experiment Number
	Step PMI		#DIV/0!
	Cumulative R-factor		#DIV/0!		fill in ↑
	Cumulative PMI Substrate, Reagents, Solvents		#DIV/0!
	Cumulative PMI Solvents		#DIV/0!		Insert comments here ...
	Cumulative PMI Aqueous		#DIV/0!
	Cumulative PMI		#DIV/0!
	Number of chem. trans.; "0" for distillation, column, filtration, salting out, etc.:
	Intern or extern manufacturing:
	Technologies used in this sheet:
		fill in - drop down	fill in
	Step Function, Name-Number:				Inherited factors from side chains
		Value	Units		R-factor	Solvents	Aqueous
	Substrate (amount added, batch size)		kg
	Substrate (assay)		wt%
	Substrate (actual amount)	0	kg
	Molar Yield (100% if this sheet is not populated)	1
	Product-Intermediate product (amount obtained, batch yield by weight)		kg
	Product-Intermediate product (assay)		wt%
	Actual amount of product-intermediate product	0	kg
	Raw Materials	Physical Charge	Units
	Substrates (as 100%) - if more than 2 substrates, add additional ones to reagents!
		0	kg
			kg
	Reagents (as 100%)
			kg
			kg
			kg
			kg
			kg
			kg
			kg
			kg
			kg
			kg
	Total mass of substrates and reagents	0	kg
	Solvents, incl. diluents of substrates
			kg
			kg
			kg
			kg
			kg
			kg
			kg
			kg
	... aqueous
			kg
			kg
			kg
			kg
			kg
			kg
			kg
	Total input material mass	0	kg
	PROCESS STEP METRICS
	Mass Substrate (kg or g)		0
	Mass Reagents (kg or g)		0
	Mass Solvents (kg or g)		0
	Mass Aqueous (kg or g)		0
	Step R-factor		#DIV/0!		Isolated?	Purity in percent?
	Step PMI Substrate, Reagents, Solvents		#DIV/0!
	Step PMI Solvents		#DIV/0!		fill in ↑	fill in ↑
	Step PMI Aqueous		#DIV/0!			Batch No (PO) or Experiment Number
	Step PMI		#DIV/0!
	Cumulative R-factor		#DIV/0!		fill in ↑
	Cumulative PMI Substrate, Reagents, Solvents		#DIV/0!
	Cumulative PMI Solvents		#DIV/0!		Insert comments here ...
	Cumulative PMI Aqueous		#DIV/0!
	Cumulative PMI		#DIV/0!
	Number of chem. trans.; "0" for distillation, column, filtration, salting out, etc.:
	Intern or extern manufacturing:
	Technologies used in this sheet:

## Sheet: Metrics template - side chain 2
	Step Function, Name-Number: SIDE CHAIN 2		Ni Cat.		Inherited factors from side chains
		Value	Units		R-factor	Solvents	Aqueous
	Substrate (amount added, batch size)	0.55	g
	Substrate (assay)	1	wt%
	Substrate (actual amount)	0.55	g
	Molar Yield	0.836
	Product-Intermediate product (amount obtained, batch yield by weight)	1.63	g
	Product-Intermediate product (assay)	1	wt%
	Actual amount of product-intermediate product	1.63	g
	Raw Materials	Physical Charge	Units
	Substrates (as 100%)
	NiCl2; CAS 7718-54-9	0.55	g
			g
	Reagents (as 100%)
	Tricyclohexylphosphine; CAS 2622-14-2	1.4	g										- The recovered EtOH was removed from the mass balance!
			g
			g
			g
			g
			g
			g
			g
			g
			g
			g
	Total mass of substrates and reagents	1.95	g
	Solvents, incl. diluents of substrates
	EtOH; Reaction; 5 mL added with the NiCl2	3.945	g
	EtOH; Reaction; 5 mL from phosphine addition, 50 mL recovered and not included!	3.945	g
	MeOH; Filter washing step	3.96	g
			g
			g
			g
			g
			g
	... aqueous
	H2O; Filter washing step	5	g
			g
			g
			g
			g
			g
			g
			g
	Total input material mass	18.8	g
	PROCESS STEP METRICS
	Mass Substrate (kg or g)		0.55
	Mass Reagents (kg or g)		1.4
	Mass Solvents (kg or g)		11.85
	Mass Aqueous (kg or g)		5
	Step R-factor		1.19632
	Step PMI Substrate, Reagents, Solvents		8.46626
	Step PMI Solvents		7.26994
	Step PMI Aqueous		3.06748
	Step PMI		11.5337
	Cumulative R-factor		1.19632
	Cumulative PMI Substrate, Reagents, Solvents		8.46626
	Cumulative PMI Solvents		7.26994
	Cumulative PMI Aqueous		3.06748
	Cumulative PMI		11.5337
		fill in - drop down	fill in
	Step Function, Name-Number:				Inherited factors from side chains
		Value	Units		R-factor	Solvents	Aqueous
	Substrate (amount added, batch size)		kg
	Substrate (assay)		wt%
	Substrate (actual amount)	0	kg
	Molar Yield (100% if this sheet is not populated)	1
	Product-Intermediate product (amount obtained, batch yield by weight)		kg
	Product-Intermediate product (assay)		wt%
	Actual amount of product-intermediate product	0	kg
	Raw Materials	Physical Charge	Units
	Substrates (as 100%) - if more than 2 substrates, add additional ones to reagents!
		0	kg
			kg
	Reagents (as 100%)
			kg
			kg
			kg
			kg
			kg
			kg
			kg
			kg
			kg
			kg
	Total mass of substrates and reagents	0	kg
	Solvents, incl. diluents of substrates
			kg
			kg
			kg
			kg
			kg
			kg
			kg
			kg
	... aqueous
			kg
			kg
			kg
			kg
			kg
			kg
			kg
	Total input material mass	0	kg
	PROCESS STEP METRICS
	Mass Substrate (kg or g)		0
	Mass Reagents (kg or g)		0
	Mass Solvents (kg or g)		0
	Mass Aqueous (kg or g)		0
	Step R-factor		#DIV/0!		Isolated?	Purity in percent?
	Step PMI Substrate, Reagents, Solvents		#DIV/0!
	Step PMI Solvents		#DIV/0!		fill in ↑	fill in ↑
	Step PMI Aqueous		#DIV/0!			Batch No (PO) or Experiment Number
	Step PMI		#DIV/0!
	Cumulative R-factor		#DIV/0!		fill in ↑
	Cumulative PMI Substrate, Reagents, Solvents		#DIV/0!
	Cumulative PMI Solvents		#DIV/0!		Insert comments here ...
	Cumulative PMI Aqueous		#DIV/0!
	Cumulative PMI		#DIV/0!
	Number of chem. trans.; "0" for distillation, column, filtration, salting out, etc.:
	Intern or extern manufacturing:
	Technologies used in this sheet:
		fill in - drop down	fill in
	Step Function, Name-Number:				Inherited factors from side chains
		Value	Units		R-factor	Solvents	Aqueous
	Substrate (amount added, batch size)		kg
	Substrate (assay)		wt%
	Substrate (actual amount)	0	kg
	Molar Yield (100% if this sheet is not populated)	1
	Product-Intermediate product (amount obtained, batch yield by weight)		kg
	Product-Intermediate product (assay)		wt%
	Actual amount of product-intermediate product	0	kg
	Raw Materials	Physical Charge	Units
	Substrates (as 100%) - if more than 2 substrates, add additional ones to reagents!
		0	kg
			kg
	Reagents (as 100%)
			kg
			kg
			kg
			kg
			kg
			kg
			kg
			kg
			kg
			kg
	Total mass of substrates and reagents	0	kg
	Solvents, incl. diluents of substrates
			kg
			kg
			kg
			kg
			kg
			kg
			kg
			kg
	... aqueous
			kg
			kg
			kg
			kg
			kg
			kg
			kg
	Total input material mass	0	kg
	PROCESS STEP METRICS
	Mass Substrate (kg or g)		0
	Mass Reagents (kg or g)		0
	Mass Solvents (kg or g)		0
	Mass Aqueous (kg or g)		0
	Step R-factor		#DIV/0!		Isolated?	Purity in percent?
	Step PMI Substrate, Reagents, Solvents		#DIV/0!
	Step PMI Solvents		#DIV/0!		fill in ↑	fill in ↑
	Step PMI Aqueous		#DIV/0!			Batch No (PO) or Experiment Number
	Step PMI		#DIV/0!
	Cumulative R-factor		#DIV/0!		fill in ↑
	Cumulative PMI Substrate, Reagents, Solvents		#DIV/0!
	Cumulative PMI Solvents		#DIV/0!		Insert comments here ...
	Cumulative PMI Aqueous		#DIV/0!
	Cumulative PMI		#DIV/0!
	Number of chem. trans.; "0" for distillation, column, filtration, salting out, etc.:
	Intern or extern manufacturing:
	Technologies used in this sheet:
		fill in - drop down	fill in
	Step Function, Name-Number:				Inherited factors from side chains
		Value	Units		R-factor	Solvents	Aqueous
	Substrate (amount added, batch size)		kg
	Substrate (assay)		wt%
	Substrate (actual amount)	0	kg
	Molar Yield (100% if this sheet is not populated)	1
	Product-Intermediate product (amount obtained, batch yield by weight)		kg
	Product-Intermediate product (assay)		wt%
	Actual amount of product-intermediate product	0	kg
	Raw Materials	Physical Charge	Units
	Substrates (as 100%) - if more than 2 substrates, add additional ones to reagents!
		0	kg
			kg
	Reagents (as 100%)
			kg
			kg
			kg
			kg
			kg
			kg
			kg
			kg
			kg
			kg
	Total mass of substrates and reagents	0	kg
	Solvents, incl. diluents of substrates
			kg
			kg
			kg
			kg
			kg
			kg
			kg
			kg
	... aqueous
			kg
			kg
			kg
			kg
			kg
			kg
			kg
	Total input material mass	0	kg
	PROCESS STEP METRICS
	Mass Substrate (kg or g)		0
	Mass Reagents (kg or g)		0
	Mass Solvents (kg or g)		0
	Mass Aqueous (kg or g)		0
	Step R-factor		#DIV/0!		Isolated?	Purity in percent?
	Step PMI Substrate, Reagents, Solvents		#DIV/0!
	Step PMI Solvents		#DIV/0!		fill in ↑	fill in ↑
	Step PMI Aqueous		#DIV/0!			Batch No (PO) or Experiment Number
	Step PMI		#DIV/0!
	Cumulative R-factor		#DIV/0!		fill in ↑
	Cumulative PMI Substrate, Reagents, Solvents		#DIV/0!
	Cumulative PMI Solvents		#DIV/0!		Insert comments here ...
	Cumulative PMI Aqueous		#DIV/0!
	Cumulative PMI		#DIV/0!
	Number of chem. trans.; "0" for distillation, column, filtration, salting out, etc.:
	Intern or extern manufacturing:
	Technologies used in this sheet:
		fill in - drop down	fill in
	Step Function, Name-Number:				Inherited factors from side chains
		Value	Units		R-factor	Solvents	Aqueous
	Substrate (amount added, batch size)		kg
	Substrate (assay)		wt%
	Substrate (actual amount)	0	kg
	Molar Yield (100% if this sheet is not populated)	1
	Product-Intermediate product (amount obtained, batch yield by weight)		kg
	Product-Intermediate product (assay)		wt%
	Actual amount of product-intermediate product	0	kg
	Raw Materials	Physical Charge	Units
	Substrates (as 100%) - if more than 2 substrates, add additional ones to reagents!
		0	kg
			kg
	Reagents (as 100%)
			kg
			kg
			kg
			kg
			kg
			kg
			kg
			kg
			kg
			kg
	Total mass of substrates and reagents	0	kg
	Solvents, incl. diluents of substrates
			kg
			kg
			kg
			kg
			kg
			kg
			kg
			kg
	... aqueous
			kg
			kg
			kg
			kg
			kg
			kg
			kg
	Total input material mass	0	kg
	PROCESS STEP METRICS
	Mass Substrate (kg or g)		0
	Mass Reagents (kg or g)		0
	Mass Solvents (kg or g)		0
	Mass Aqueous (kg or g)		0
	Step R-factor		#DIV/0!		Isolated?	Purity in percent?
	Step PMI Substrate, Reagents, Solvents		#DIV/0!
	Step PMI Solvents		#DIV/0!		fill in ↑	fill in ↑
	Step PMI Aqueous		#DIV/0!			Batch No (PO) or Experiment Number
	Step PMI		#DIV/0!
	Cumulative R-factor		#DIV/0!		fill in ↑
	Cumulative PMI Substrate, Reagents, Solvents		#DIV/0!
	Cumulative PMI Solvents		#DIV/0!		Insert comments here ...
	Cumulative PMI Aqueous		#DIV/0!
	Cumulative PMI		#DIV/0!
	Number of chem. trans.; "0" for distillation, column, filtration, salting out, etc.:
	Intern or extern manufacturing:
	Technologies used in this sheet:
		fill in - drop down	fill in
	Step Function, Name-Number:				Inherited factors from side chains
		Value	Units		R-factor	Solvents	Aqueous
	Substrate (amount added, batch size)		kg
	Substrate (assay)		wt%
	Substrate (actual amount)	0	kg
	Molar Yield (100% if this sheet is not populated)	1
	Product-Intermediate product (amount obtained, batch yield by weight)		kg
	Product-Intermediate product (assay)		wt%
	Actual amount of product-intermediate product	0	kg
	Raw Materials	Physical Charge	Units
	Substrates (as 100%) - if more than 2 substrates, add additional ones to reagents!
		0	kg
			kg
	Reagents (as 100%)
			kg
			kg
			kg
			kg
			kg
			kg
			kg
			kg
			kg
			kg
	Total mass of substrates and reagents	0	kg
	Solvents, incl. diluents of substrates
			kg
			kg
			kg
			kg
			kg
			kg
			kg
			kg
	... aqueous
			kg
			kg
			kg
			kg
			kg
			kg
			kg
	Total input material mass	0	kg
	PROCESS STEP METRICS
	Mass Substrate (kg or g)		0
	Mass Reagents (kg or g)		0
	Mass Solvents (kg or g)		0
	Mass Aqueous (kg or g)		0
	Step R-factor		#DIV/0!		Isolated?	Purity in percent?
	Step PMI Substrate, Reagents, Solvents		#DIV/0!
	Step PMI Solvents		#DIV/0!		fill in ↑	fill in ↑
	Step PMI Aqueous		#DIV/0!			Batch No (PO) or Experiment Number
	Step PMI		#DIV/0!
	Cumulative R-factor		#DIV/0!		fill in ↑
	Cumulative PMI Substrate, Reagents, Solvents		#DIV/0!
	Cumulative PMI Solvents		#DIV/0!		Insert comments here ...
	Cumulative PMI Aqueous		#DIV/0!
	Cumulative PMI		#DIV/0!
	Number of chem. trans.; "0" for distillation, column, filtration, salting out, etc.:
	Intern or extern manufacturing:
	Technologies used in this sheet:
		fill in - drop down	fill in
	Step Function, Name-Number:				Inherited factors from side chains
		Value	Units		R-factor	Solvents	Aqueous
	Substrate (amount added, batch size)		kg
	Substrate (assay)		wt%
	Substrate (actual amount)	0	kg
	Molar Yield (100% if this sheet is not populated)	1
	Product-Intermediate product (amount obtained, batch yield by weight)		kg
	Product-Intermediate product (assay)		wt%
	Actual amount of product-intermediate product	0	kg
	Raw Materials	Physical Charge	Units
	Substrates (as 100%) - if more than 2 substrates, add additional ones to reagents!
		0	kg
			kg
	Reagents (as 100%)
			kg
			kg
			kg
			kg
			kg
			kg
			kg
			kg
			kg
			kg
	Total mass of substrates and reagents	0	kg
	Solvents, incl. diluents of substrates
			kg
			kg
			kg
			kg
			kg
			kg
			kg
			kg
	... aqueous
			kg
			kg
			kg
			kg
			kg
			kg
			kg
	Total input material mass	0	kg
	PROCESS STEP METRICS
	Mass Substrate (kg or g)		0
	Mass Reagents (kg or g)		0
	Mass Solvents (kg or g)		0
	Mass Aqueous (kg or g)		0
	Step R-factor		#DIV/0!		Isolated?	Purity in percent?
	Step PMI Substrate, Reagents, Solvents		#DIV/0!
	Step PMI Solvents		#DIV/0!		fill in ↑	fill in ↑
	Step PMI Aqueous		#DIV/0!			Batch No (PO) or Experiment Number
	Step PMI		#DIV/0!
	Cumulative R-factor		#DIV/0!		fill in ↑
	Cumulative PMI Substrate, Reagents, Solvents		#DIV/0!
	Cumulative PMI Solvents		#DIV/0!		Insert comments here ...
	Cumulative PMI Aqueous		#DIV/0!
	Cumulative PMI		#DIV/0!
	Number of chem. trans.; "0" for distillation, column, filtration, salting out, etc.:
	Intern or extern manufacturing:
	Technologies used in this sheet:
		fill in - drop down	fill in
	Step Function, Name-Number:				Inherited factors from side chains
		Value	Units		R-factor	Solvents	Aqueous
	Substrate (amount added, batch size)		kg
	Substrate (assay)		wt%
	Substrate (actual amount)	0	kg
	Molar Yield (100% if this sheet is not populated)	1
	Product-Intermediate product (amount obtained, batch yield by weight)		kg
	Product-Intermediate product (assay)		wt%
	Actual amount of product-intermediate product	0	kg
	Raw Materials	Physical Charge	Units
	Substrates (as 100%) - if more than 2 substrates, add additional ones to reagents!
		0	kg
			kg
	Reagents (as 100%)
			kg
			kg
			kg
			kg
			kg
			kg
			kg
			kg
			kg
			kg
	Total mass of substrates and reagents	0	kg
	Solvents, incl. diluents of substrates
			kg
			kg
			kg
			kg
			kg
			kg
			kg
			kg
	... aqueous
			kg
			kg
			kg
			kg
			kg
			kg
			kg
	Total input material mass	0	kg
	PROCESS STEP METRICS
	Mass Substrate (kg or g)		0
	Mass Reagents (kg or g)		0
	Mass Solvents (kg or g)		0
	Mass Aqueous (kg or g)		0
	Step R-factor		#DIV/0!		Isolated?	Purity in percent?
	Step PMI Substrate, Reagents, Solvents		#DIV/0!
	Step PMI Solvents		#DIV/0!		fill in ↑	fill in ↑
	Step PMI Aqueous		#DIV/0!			Batch No (PO) or Experiment Number
	Step PMI		#DIV/0!
	Cumulative R-factor		#DIV/0!		fill in ↑
	Cumulative PMI Substrate, Reagents, Solvents		#DIV/0!
	Cumulative PMI Solvents		#DIV/0!		Insert comments here ...
	Cumulative PMI Aqueous		#DIV/0!
	Cumulative PMI		#DIV/0!
	Number of chem. trans.; "0" for distillation, column, filtration, salting out, etc.:
	Intern or extern manufacturing:
	Technologies used in this sheet:
		fill in - drop down	fill in
	Step Function, Name-Number:				Inherited factors from side chains
		Value	Units		R-factor	Solvents	Aqueous
	Substrate (amount added, batch size)		kg
	Substrate (assay)		wt%
	Substrate (actual amount)	0	kg
	Molar Yield (100% if this sheet is not populated)	1
	Product-Intermediate product (amount obtained, batch yield by weight)		kg
	Product-Intermediate product (assay)		wt%
	Actual amount of product-intermediate product	0	kg
	Raw Materials	Physical Charge	Units
	Substrates (as 100%) - if more than 2 substrates, add additional ones to reagents!
		0	kg
			kg
	Reagents (as 100%)
			kg
			kg
			kg
			kg
			kg
			kg
			kg
			kg
			kg
			kg
	Total mass of substrates and reagents	0	kg
	Solvents, incl. diluents of substrates
			kg
			kg
			kg
			kg
			kg
			kg
			kg
			kg
	... aqueous
			kg
			kg
			kg
			kg
			kg
			kg
			kg
	Total input material mass	0	kg
	PROCESS STEP METRICS
	Mass Substrate (kg or g)		0
	Mass Reagents (kg or g)		0
	Mass Solvents (kg or g)		0
	Mass Aqueous (kg or g)		0
	Step R-factor		#DIV/0!		Isolated?	Purity in percent?
	Step PMI Substrate, Reagents, Solvents		#DIV/0!
	Step PMI Solvents		#DIV/0!		fill in ↑	fill in ↑
	Step PMI Aqueous		#DIV/0!			Batch No (PO) or Experiment Number
	Step PMI		#DIV/0!
	Cumulative R-factor		#DIV/0!		fill in ↑
	Cumulative PMI Substrate, Reagents, Solvents		#DIV/0!
	Cumulative PMI Solvents		#DIV/0!		Insert comments here ...
	Cumulative PMI Aqueous		#DIV/0!
	Cumulative PMI		#DIV/0!
	Number of chem. trans.; "0" for distillation, column, filtration, salting out, etc.:
	Intern or extern manufacturing:
	Technologies used in this sheet:
		fill in - drop down	fill in
	Step Function, Name-Number:				Inherited factors from side chains
		Value	Units		R-factor	Solvents	Aqueous
	Substrate (amount added, batch size)		kg
	Substrate (assay)		wt%
	Substrate (actual amount)	0	kg
	Molar Yield (100% if this sheet is not populated)	1
	Product-Intermediate product (amount obtained, batch yield by weight)		kg
	Product-Intermediate product (assay)		wt%
	Actual amount of product-intermediate product	0	kg
	Raw Materials	Physical Charge	Units
	Substrates (as 100%) - if more than 2 substrates, add additional ones to reagents!
		0	kg
			kg
	Reagents (as 100%)
			kg
			kg
			kg
			kg
			kg
			kg
			kg
			kg
			kg
			kg
	Total mass of substrates and reagents	0	kg
	Solvents, incl. diluents of substrates
			kg
			kg
			kg
			kg
			kg
			kg
			kg
			kg
	... aqueous
			kg
			kg
			kg
			kg
			kg
			kg
			kg
	Total input material mass	0	kg
	PROCESS STEP METRICS
	Mass Substrate (kg or g)		0
	Mass Reagents (kg or g)		0
	Mass Solvents (kg or g)		0
	Mass Aqueous (kg or g)		0
	Step R-factor		#DIV/0!		Isolated?	Purity in percent?
	Step PMI Substrate, Reagents, Solvents		#DIV/0!
	Step PMI Solvents		#DIV/0!		fill in ↑	fill in ↑
	Step PMI Aqueous		#DIV/0!			Batch No (PO) or Experiment Number
	Step PMI		#DIV/0!
	Cumulative R-factor		#DIV/0!		fill in ↑
	Cumulative PMI Substrate, Reagents, Solvents		#DIV/0!
	Cumulative PMI Solvents		#DIV/0!		Insert comments here ...
	Cumulative PMI Aqueous		#DIV/0!
	Cumulative PMI		#DIV/0!
	Number of chem. trans.; "0" for distillation, column, filtration, salting out, etc.:
	Intern or extern manufacturing:
	Technologies used in this sheet:

## Sheet: PMI-Science 2015, 349, 1087.
	Source - Idea:
	PMI SUMMARY TABLE - PROCESS INCL. MAIN CHAIN											Overall Yield Main Chain:			0.82
	Step Name - Number (Main Chain)	0	0	0	0	0	0	0	0	0	0	0	0	0	0
	Mass Substrate (g or kg)	0.196315	0	0	0	0	0	0	0	0	0	0	0	0	0
	Mass Reagents (g or kg)	2.81327	0	0	0	0	0	0	0	0	0	0	0	0	0
	Mass Solvents (g or kg)	16.1573	0	0	0	0	0	0	0	0	0	0	0	0	0
	Mass Aqueous (g or kg)	1.2255	0	0	0	0	0	0	0	0	0	0	0	0	0
	Isolated amount of product (g or kg)	0.084	0	0	0	0	0	0	0	0	0	0	0	0	0
	Factor intermediate - substrate	0.427885	#DIV/0!	#DIV/0!	#DIV/0!	#DIV/0!	#DIV/0!	#DIV/0!	#DIV/0!	#DIV/0!	#DIV/0!	#DIV/0!	#DIV/0!	#DIV/0!	#DIV/0!
	Cumulated ratio current intermediate vs 1st intermediate	0.427885	#DIV/0!	#DIV/0!	#DIV/0!	#DIV/0!	#DIV/0!	#DIV/0!	#DIV/0!	#DIV/0!	#DIV/0!	#DIV/0!	#DIV/0!	#DIV/0!	#DIV/0!
	Step R-factor	35.8283	#DIV/0!	#DIV/0!	#DIV/0!	#DIV/0!	#DIV/0!	#DIV/0!	#DIV/0!	#DIV/0!	#DIV/0!	#DIV/0!	#DIV/0!	#DIV/0!	#DIV/0!
	Step PMI Substrate, Reagents, Solvents	228.177	#DIV/0!	#DIV/0!	#DIV/0!	#DIV/0!	#DIV/0!	#DIV/0!	#DIV/0!	#DIV/0!	#DIV/0!	#DIV/0!	#DIV/0!	#DIV/0!	#DIV/0!
	Step PMI Solvents	192.349	#DIV/0!	#DIV/0!	#DIV/0!	#DIV/0!	#DIV/0!	#DIV/0!	#DIV/0!	#DIV/0!	#DIV/0!	#DIV/0!	#DIV/0!	#DIV/0!	#DIV/0!
	Step PMI Aqueous	14.5893	#DIV/0!	#DIV/0!	#DIV/0!	#DIV/0!	#DIV/0!	#DIV/0!	#DIV/0!	#DIV/0!	#DIV/0!	#DIV/0!	#DIV/0!	#DIV/0!	#DIV/0!
	Step PMI	242.766	#DIV/0!	#DIV/0!	#DIV/0!	#DIV/0!	#DIV/0!	#DIV/0!	#DIV/0!	#DIV/0!	#DIV/0!	#DIV/0!	#DIV/0!	#DIV/0!	#DIV/0!
	Cumulative R-factor	42.5709	#DIV/0!	#DIV/0!	#DIV/0!	#DIV/0!	#DIV/0!	#DIV/0!	#DIV/0!	#DIV/0!	#DIV/0!	#DIV/0!	#DIV/0!	#DIV/0!	#DIV/0!
	Cumulative PMI Substrate, Reagents, Solvents	289.034	#DIV/0!	#DIV/0!	#DIV/0!	#DIV/0!	#DIV/0!	#DIV/0!	#DIV/0!	#DIV/0!	#DIV/0!	#DIV/0!	#DIV/0!	#DIV/0!	#DIV/0!
	Cumulative PMI Solvents	246.463	#DIV/0!	#DIV/0!	#DIV/0!	#DIV/0!	#DIV/0!	#DIV/0!	#DIV/0!	#DIV/0!	#DIV/0!	#DIV/0!	#DIV/0!	#DIV/0!	#DIV/0!
	Cumulative PMI Aqueous	59.3094	#DIV/0!	#DIV/0!	#DIV/0!	#DIV/0!	#DIV/0!	#DIV/0!	#DIV/0!	#DIV/0!	#DIV/0!	#DIV/0!	#DIV/0!	#DIV/0!	#DIV/0!
	Cumulative PMI	348.344	#DIV/0!	#DIV/0!	#DIV/0!	#DIV/0!	#DIV/0!	#DIV/0!	#DIV/0!	#DIV/0!	#DIV/0!	#DIV/0!	#DIV/0!	#DIV/0!	#DIV/0!
	PMI SUMMARY - Side Chain 1											Overall Yield Side Chain 1:			0.8
	Step Name - Number	RB(OH)2	0	0	0	0	0	0	0	0	0
	Mass Substrate (g or kg)	8.15	0	0	0	0	0	0	0	0	0
	Mass Reagents (g or kg)	23.3882	0	0	0	0	0	0	0	0	0
	Mass Solvents (g or kg)	170.095	0	0	0	0	0	0	0	0	0
	Mass Aqueous (g or kg)	247.215	0	0	0	0	0	0	0	0	0
	Isolated amount of product (g or kg)	5.2	0	0	0	0	0	0	0	0	0
	Step R-factor	6.06504	#DIV/0!	#DIV/0!	#DIV/0!	#DIV/0!	#DIV/0!	#DIV/0!	#DIV/0!	#DIV/0!	#DIV/0!
	Step PMI Substrate, Reagents, Solvents	38.7755	#DIV/0!	#DIV/0!	#DIV/0!	#DIV/0!	#DIV/0!	#DIV/0!	#DIV/0!	#DIV/0!	#DIV/0!
	Step PMI Solvents	32.7105	#DIV/0!	#DIV/0!	#DIV/0!	#DIV/0!	#DIV/0!	#DIV/0!	#DIV/0!	#DIV/0!	#DIV/0!
	Step PMI Aqueous	47.5414	#DIV/0!	#DIV/0!	#DIV/0!	#DIV/0!	#DIV/0!	#DIV/0!	#DIV/0!	#DIV/0!	#DIV/0!
	Step PMI	86.3169	#DIV/0!	#DIV/0!	#DIV/0!	#DIV/0!	#DIV/0!	#DIV/0!	#DIV/0!	#DIV/0!	#DIV/0!
	Cumulative R-factor	6.06504	#DIV/0!	#DIV/0!	#DIV/0!	#DIV/0!	#DIV/0!	#DIV/0!	#DIV/0!	#DIV/0!	#DIV/0!
	Cumulative PMI Substrate, Reagents, Solvents	38.7755	#DIV/0!	#DIV/0!	#DIV/0!	#DIV/0!	#DIV/0!	#DIV/0!	#DIV/0!	#DIV/0!	#DIV/0!
	Cumulative PMI Solvents	32.7105	#DIV/0!	#DIV/0!	#DIV/0!	#DIV/0!	#DIV/0!	#DIV/0!	#DIV/0!	#DIV/0!	#DIV/0!
	Cumulative PMI Aqueous	47.5414	#DIV/0!	#DIV/0!	#DIV/0!	#DIV/0!	#DIV/0!	#DIV/0!	#DIV/0!	#DIV/0!	#DIV/0!
	Cumulative PMI	86.3169	#DIV/0!	#DIV/0!	#DIV/0!	#DIV/0!	#DIV/0!	#DIV/0!	#DIV/0!	#DIV/0!	#DIV/0!
	PMI SUMMARY - Side Chain 2											Overall Yield Side Chain 2:			0.59
	Step Name - Number	Sphos	Nano cat.	0	0	0	0	0	0	0	0
	Mass Substrate (g or kg)	4.7308	1.015	0	0	0	0	0	0	0	0
	Mass Reagents (g or kg)	9.69965	0.968202	0	0	0	0	0	0	0	0
	Mass Solvents (g or kg)	262.088	45.1	0	0	0	0	0	0	0	0
	Mass Aqueous (g or kg)	0	0.1	0	0	0	0	0	0	0	0
	Isolated amount of product (g or kg)	3.32	2.7	0	0	0	0	0	0	0	0
	Step R-factor	4.34652	0.734519	#DIV/0!	#DIV/0!	#DIV/0!	#DIV/0!	#DIV/0!	#DIV/0!	#DIV/0!	#DIV/0!
	Step PMI Substrate, Reagents, Solvents	83.2887	17.4382	#DIV/0!	#DIV/0!	#DIV/0!	#DIV/0!	#DIV/0!	#DIV/0!	#DIV/0!	#DIV/0!
	Step PMI Solvents	78.9422	16.7037	#DIV/0!	#DIV/0!	#DIV/0!	#DIV/0!	#DIV/0!	#DIV/0!	#DIV/0!	#DIV/0!
	Step PMI Aqueous	0	0.037037	#DIV/0!	#DIV/0!	#DIV/0!	#DIV/0!	#DIV/0!	#DIV/0!	#DIV/0!	#DIV/0!
	Step PMI	83.2887	17.4753	#DIV/0!	#DIV/0!	#DIV/0!	#DIV/0!	#DIV/0!	#DIV/0!	#DIV/0!	#DIV/0!
	Cumulative R-factor	4.34652	1.99256	#DIV/0!	#DIV/0!	#DIV/0!	#DIV/0!	#DIV/0!	#DIV/0!	#DIV/0!	#DIV/0!
	Cumulative PMI Substrate, Reagents, Solvents	83.2887	48.3727	#DIV/0!	#DIV/0!	#DIV/0!	#DIV/0!	#DIV/0!	#DIV/0!	#DIV/0!	#DIV/0!
	Cumulative PMI Solvents	78.9422	46.3801	#DIV/0!	#DIV/0!	#DIV/0!	#DIV/0!	#DIV/0!	#DIV/0!	#DIV/0!	#DIV/0!
	Cumulative PMI Aqueous	0	0.037037	#DIV/0!	#DIV/0!	#DIV/0!	#DIV/0!	#DIV/0!	#DIV/0!	#DIV/0!	#DIV/0!
	Cumulative PMI	83.2887	48.4097	#DIV/0!	#DIV/0!	#DIV/0!	#DIV/0!	#DIV/0!	#DIV/0!	#DIV/0!	#DIV/0!
	PMI SUMMARY - Side Chain 3											Overall Yield Side Chain 3:			0.969
	Step Name - Number	Toc. Succ.	TPGS	0	0	0	0	0	0	0	0
	Mass Substrate (g or kg)	89.5	188.758	0	0	0	0	0	0	0	0
	Mass Reagents (g or kg)	741.574	603.01	0	0	0	0	0	0	0	0
	Mass Solvents (g or kg)	5137.5	4475.52	0	0	0	0	0	0	0	0
	Mass Aqueous (g or kg)	915.955	0	0	0	0	0	0	0	0	0
	Isolated amount of product (g or kg)	79.26	174.11	0	0	0	0	0	0	0	0
	Step R-factor	10.4854	4.54751	#DIV/0!	#DIV/0!	#DIV/0!	#DIV/0!	#DIV/0!	#DIV/0!	#DIV/0!	#DIV/0!
	Step PMI Substrate, Reagents, Solvents	75.3037	30.2526	#DIV/0!	#DIV/0!	#DIV/0!	#DIV/0!	#DIV/0!	#DIV/0!	#DIV/0!	#DIV/0!
	Step PMI Solvents	64.8183	25.7051	#DIV/0!	#DIV/0!	#DIV/0!	#DIV/0!	#DIV/0!	#DIV/0!	#DIV/0!	#DIV/0!
	Step PMI Aqueous	11.5563	0	#DIV/0!	#DIV/0!	#DIV/0!	#DIV/0!	#DIV/0!	#DIV/0!	#DIV/0!	#DIV/0!
	Step PMI	86.8601	30.2526	#DIV/0!	#DIV/0!	#DIV/0!	#DIV/0!	#DIV/0!	#DIV/0!	#DIV/0!	#DIV/0!
	Cumulative R-factor	10.4854	8.86542	#DIV/0!	#DIV/0!	#DIV/0!	#DIV/0!	#DIV/0!	#DIV/0!	#DIV/0!	#DIV/0!
	Cumulative PMI Substrate, Reagents, Solvents	75.3037	64.0769	#DIV/0!	#DIV/0!	#DIV/0!	#DIV/0!	#DIV/0!	#DIV/0!	#DIV/0!	#DIV/0!
	Cumulative PMI Solvents	64.8183	55.2114	#DIV/0!	#DIV/0!	#DIV/0!	#DIV/0!	#DIV/0!	#DIV/0!	#DIV/0!	#DIV/0!
	Cumulative PMI Aqueous	11.5563	5.26063	#DIV/0!	#DIV/0!	#DIV/0!	#DIV/0!	#DIV/0!	#DIV/0!	#DIV/0!	#DIV/0!
	Cumulative PMI	86.8601	69.3375	#DIV/0!	#DIV/0!	#DIV/0!	#DIV/0!	#DIV/0!	#DIV/0!	#DIV/0!	#DIV/0!

## Sheet: Metrics template - main chain-b
	Step Function, Name-Number: MAIN CHAIN				Inherited factors from side chains
		Value	Units		R-factor	Solvents	Aqueous
	Substrate (amount added, batch size)	0.0794925	g
	Substrate (assay)	1	wt%
	Substrate (actual amount)	0.0794925	g
	Molar Yield	0.82
	Product-Intermediate product (amount obtained, batch yield by weight)	0.084	g
	Product-Intermediate product (assay)	1	wt%
	Actual amount of product-intermediate product	0.084	g
	Raw Materials	Physical Charge	Units
	Substrates (as 100%)
	5-Bromopyrimidine; CAS 4595-59-9	0.0794925	g
	Nanoparticles	0.02	g		1.99256	46.3801	0.037037
	Thiophene-3-boronic acid; CAS 6165-69-1	0.076782	g		6.06504	32.7105	47.5414
	TPGS-750-M; Pure TPGS-750-M from 1.0 mL 2 wt.-% TPGS-750-M in H2O, d 1.002 g mL-1	0.02004	g		8.86542	55.2114	5.26063
			g
	Reagents (as 100%)
	K3PO4 x H2O; Reaction	0.173	g
			g
	NaCl; Extraction; from brine wash of org. phases	0.0751667	g
			g
	Na2SO4; Extraction; assumed to be 5 wt.-% of EtOAc	0.0451	g
			g
	SiO2; Purification; assumed to be 3000 wt.-% of isolated product	2.52	g
			g
			g
			g
			g
	Total mass of substrates and reagents	3.00958	g
	Solvents, incl. diluents of substrates
	EtOAc; Extraction	0.902	g
			g
	EtOAc; Extraction; assumed to be 300 wt.-% of amount Na2SO4 assumed	0.1353	g
			g
	EtOAc; Purification; assumed to be 300 wt.-% of amount SiO2	7.56	g
	n-Hexanes; Purification; assumed to be 300 wt.-% of amount SiO2	7.56	g
			g
			g
			g
			g
			g
	... aqueous
	H2O; Reaction; from TPGS solution	1	g
			g
			g
	H2O; Extraction; from brine wash of org. phases; assumed to be 30 wt.-% of EtOAc added	0.2255	g
			g
			g
			g
			g
	Total input material mass	20.3924	g
	PROCESS STEP METRICS
	Mass Substrate (kg or g)		0.196315
	Mass Reagents (kg or g)		2.81327
	Mass Solvents (kg or g)		16.1573
	Mass Aqueous (kg or g)		1.2255
	Step R-factor		35.8283										- It is assumed, that the org. phase is washed with brine. - Brine assumed to be 25 wt.-% NaCl and 75 wt.-% H2O
	Step PMI Substrate, Reagents, Solvents		228.177
	Step PMI Solvents		192.349
	Step PMI Aqueous		14.5893
	Step PMI		242.766
	Cumulative R-factor		42.5709
	Cumulative PMI Substrate, Reagents, Solvents		289.034
	Cumulative PMI Solvents		246.463
	Cumulative PMI Aqueous		59.3094
	Cumulative PMI		348.344
		fill in - drop down	fill in
	Step Function, Name-Number:
		Value	Units
	Substrate (amount added, batch size)		kg
	Substrate (assay)		wt%
	Substrate (actual amount)	0	kg
	Molar Yield (100% if this sheet is not populated)	1
	Product-Intermediate product (amount obtained, batch yield by weight)		kg
	Product-Intermediate product (assay)		wt%
	Actual amount of product-intermediate product	0	kg
	Raw Materials	Physical Charge	Units
	Substrates (as 100%) - if more than 2 substrates, add additional ones to reagents!
		0	kg
			kg
	Reagents (as 100%)
			kg
			kg
			kg
			kg
			kg
			kg
			kg
			kg
			kg
			kg
	Total mass of substrates and reagents	0	kg
	Solvents, incl. diluents of substrates
			kg
			kg
			kg
			kg
			kg
			kg
			kg
			kg
	... aqueous
			kg
			kg
			kg
			kg
			kg
			kg
			kg
	Total input material mass	0	kg
	PROCESS STEP METRICS
	Mass Substrate (kg or g)		0
	Mass Reagents (kg or g)		0		Isolated?	Purity in percent?
	Mass Solvents (kg or g)		0
	Mass Aqueous (kg or g)		0		fill in ↑	fill in ↑
	Step R-factor		#DIV/0!			Batch No (PO) or Experiment Number
	Step PMI Substrate, Reagents, Solvents		#DIV/0!
	Step PMI Solvents		#DIV/0!		fill in ↑
	Step PMI Aqueous		#DIV/0!
	Step PMI		#DIV/0!		Insert comments here ...
	Cumulative R-factor		#DIV/0!
	Cumulative PMI Substrate, Reagents, Solvents		#DIV/0!
	Cumulative PMI Solvents		#DIV/0!
	Cumulative PMI Aqueous		#DIV/0!
	Cumulative PMI		#DIV/0!
	Number of chem. trans.; "0" for distillation, column, filtration, salting out, etc.:
	Intern or extern manufacturing:
	Technologies used in this sheet:				Inherited factors from side chains
					R-factor	Solvents	Aqueous
		fill in - drop down	fill in
	Step Function, Name-Number:
		Value	Units
	Substrate (amount added, batch size)		kg
	Substrate (assay)		wt%
	Substrate (actual amount)	0	kg
	Molar Yield (100% if this sheet is not populated)	1
	Product-Intermediate product (amount obtained, batch yield by weight)		kg
	Product-Intermediate product (assay)		wt%
	Actual amount of product-intermediate product	0	kg
	Raw Materials	Physical Charge	Units
	Substrates (as 100%) - if more than 2 substrates, add additional ones to reagents!
		0	kg
			kg
	Reagents (as 100%)
			kg
			kg
			kg
			kg
			kg
			kg
			kg
			kg
			kg
			kg
	Total mass of substrates and reagents	0	kg
	Solvents, incl. diluents of substrates
			kg
			kg
			kg
			kg
			kg
			kg
			kg
			kg
	... aqueous
			kg
			kg
			kg
			kg
			kg
			kg
			kg
	Total input material mass	0	kg
	PROCESS STEP METRICS
	Mass Substrate (kg or g)		0
	Mass Reagents (kg or g)		0		Isolated?	Purity in percent?
	Mass Solvents (kg or g)		0
	Mass Aqueous (kg or g)		0		fill in ↑	fill in ↑
	Step R-factor		#DIV/0!			Batch No (PO) or Experiment Number
	Step PMI Substrate, Reagents, Solvents		#DIV/0!
	Step PMI Solvents		#DIV/0!		fill in ↑
	Step PMI Aqueous		#DIV/0!
	Step PMI		#DIV/0!		Insert comments here ...
	Cumulative R-factor		#DIV/0!
	Cumulative PMI Substrate, Reagents, Solvents		#DIV/0!
	Cumulative PMI Solvents		#DIV/0!
	Cumulative PMI Aqueous		#DIV/0!
	Cumulative PMI		#DIV/0!
	Number of chem. trans.; "0" for distillation, column, filtration, salting out, etc.:
	Intern or extern manufacturing:
	Technologies used in this sheet:				Inherited factors from side chains
					R-factor	Solvents	Aqueous
		fill in - drop down	fill in
	Step Function, Name-Number:
		Value	Units
	Substrate (amount added, batch size)		kg
	Substrate (assay)		wt%
	Substrate (actual amount)	0	kg
	Molar Yield (100% if this sheet is not populated)	1
	Product-Intermediate product (amount obtained, batch yield by weight)		kg
	Product-Intermediate product (assay)		wt%
	Actual amount of product-intermediate product	0	kg
	Raw Materials	Physical Charge	Units
	Substrates (as 100%) - if more than 2 substrates, add additional ones to reagents!
		0	kg
			kg
	Reagents (as 100%)
			kg
			kg
			kg
			kg
			kg
			kg
			kg
			kg
			kg
			kg
	Total mass of substrates and reagents	0	kg
	Solvents, incl. diluents of substrates
			kg
			kg
			kg
			kg
			kg
			kg
			kg
			kg
	... aqueous
			kg
			kg
			kg
			kg
			kg
			kg
			kg
	Total input material mass	0	kg
	PROCESS STEP METRICS
	Mass Substrate (kg or g)		0
	Mass Reagents (kg or g)		0		Isolated?	Purity in percent?
	Mass Solvents (kg or g)		0
	Mass Aqueous (kg or g)		0		fill in ↑	fill in ↑
	Step R-factor		#DIV/0!			Batch No (PO) or Experiment Number
	Step PMI Substrate, Reagents, Solvents		#DIV/0!
	Step PMI Solvents		#DIV/0!		fill in ↑
	Step PMI Aqueous		#DIV/0!
	Step PMI		#DIV/0!		Insert comments here ...
	Cumulative R-factor		#DIV/0!
	Cumulative PMI Substrate, Reagents, Solvents		#DIV/0!
	Cumulative PMI Solvents		#DIV/0!
	Cumulative PMI Aqueous		#DIV/0!
	Cumulative PMI		#DIV/0!
	Number of chem. trans.; "0" for distillation, column, filtration, salting out, etc.:
	Intern or extern manufacturing:
	Technologies used in this sheet:				Inherited factors from side chains
					R-factor	Solvents	Aqueous
		fill in - drop down	fill in
	Step Function, Name-Number:
		Value	Units
	Substrate (amount added, batch size)		kg
	Substrate (assay)		wt%
	Substrate (actual amount)	0	kg
	Molar Yield (100% if this sheet is not populated)	1
	Product-Intermediate product (amount obtained, batch yield by weight)		kg
	Product-Intermediate product (assay)		wt%
	Actual amount of product-intermediate product	0	kg
	Raw Materials	Physical Charge	Units
	Substrates (as 100%) - if more than 2 substrates, add additional ones to reagents!
		0	kg
			kg
	Reagents (as 100%)
			kg
			kg
			kg
			kg
			kg
			kg
			kg
			kg
			kg
			kg
	Total mass of substrates and reagents	0	kg
	Solvents, incl. diluents of substrates
			kg
			kg
			kg
			kg
			kg
			kg
			kg
			kg
	... aqueous
			kg
			kg
			kg
			kg
			kg
			kg
			kg
	Total input material mass	0	kg
	PROCESS STEP METRICS
	Mass Substrate (kg or g)		0
	Mass Reagents (kg or g)		0		Isolated?	Purity in percent?
	Mass Solvents (kg or g)		0
	Mass Aqueous (kg or g)		0		fill in ↑	fill in ↑
	Step R-factor		#DIV/0!			Batch No (PO) or Experiment Number
	Step PMI Substrate, Reagents, Solvents		#DIV/0!
	Step PMI Solvents		#DIV/0!		fill in ↑
	Step PMI Aqueous		#DIV/0!
	Step PMI		#DIV/0!		Insert comments here ...
	Cumulative R-factor		#DIV/0!
	Cumulative PMI Substrate, Reagents, Solvents		#DIV/0!
	Cumulative PMI Solvents		#DIV/0!
	Cumulative PMI Aqueous		#DIV/0!
	Cumulative PMI		#DIV/0!
	Number of chem. trans.; "0" for distillation, column, filtration, salting out, etc.:
	Intern or extern manufacturing:
	Technologies used in this sheet:				Inherited factors from side chains
					R-factor	Solvents	Aqueous
		fill in - drop down	fill in
	Step Function, Name-Number:
		Value	Units
	Substrate (amount added, batch size)		kg
	Substrate (assay)		wt%
	Substrate (actual amount)	0	kg
	Molar Yield (100% if this sheet is not populated)	1
	Product-Intermediate product (amount obtained, batch yield by weight)		kg
	Product-Intermediate product (assay)		wt%
	Actual amount of product-intermediate product	0	kg
	Raw Materials	Physical Charge	Units
	Substrates (as 100%) - if more than 2 substrates, add additional ones to reagents!
		0	kg
			kg
	Reagents (as 100%)
			kg
			kg
			kg
			kg
			kg
			kg
			kg
			kg
			kg
			kg
	Total mass of substrates and reagents	0	kg
	Solvents, incl. diluents of substrates
			kg
			kg
			kg
			kg
			kg
			kg
			kg
			kg
	... aqueous
			kg
			kg
			kg
			kg
			kg
			kg
			kg
	Total input material mass	0	kg
	PROCESS STEP METRICS
	Mass Substrate (kg or g)		0
	Mass Reagents (kg or g)		0		Isolated?	Purity in percent?
	Mass Solvents (kg or g)		0
	Mass Aqueous (kg or g)		0		fill in ↑	fill in ↑
	Step R-factor		#DIV/0!			Batch No (PO) or Experiment Number
	Step PMI Substrate, Reagents, Solvents		#DIV/0!
	Step PMI Solvents		#DIV/0!		fill in ↑
	Step PMI Aqueous		#DIV/0!
	Step PMI		#DIV/0!		Insert comments here ...
	Cumulative R-factor		#DIV/0!
	Cumulative PMI Substrate, Reagents, Solvents		#DIV/0!
	Cumulative PMI Solvents		#DIV/0!
	Cumulative PMI Aqueous		#DIV/0!
	Cumulative PMI		#DIV/0!
	Number of chem. trans.; "0" for distillation, column, filtration, salting out, etc.:
	Intern or extern manufacturing:
	Technologies used in this sheet:				Inherited factors from side chains
					R-factor	Solvents	Aqueous
		fill in - drop down	fill in
	Step Function, Name-Number:
		Value	Units
	Substrate (amount added, batch size)		kg
	Substrate (assay)		wt%
	Substrate (actual amount)	0	kg
	Molar Yield (100% if this sheet is not populated)	1
	Product-Intermediate product (amount obtained, batch yield by weight)		kg
	Product-Intermediate product (assay)		wt%
	Actual amount of product-intermediate product	0	kg
	Raw Materials	Physical Charge	Units
	Substrates (as 100%) - if more than 2 substrates, add additional ones to reagents!
		0	kg
			kg
	Reagents (as 100%)
			kg
			kg
			kg
			kg
			kg
			kg
			kg
			kg
			kg
			kg
	Total mass of substrates and reagents	0	kg
	Solvents, incl. diluents of substrates
			kg
			kg
			kg
			kg
			kg
			kg
			kg
			kg
	... aqueous
			kg
			kg
			kg
			kg
			kg
			kg
			kg
	Total input material mass	0	kg
	PROCESS STEP METRICS
	Mass Substrate (kg or g)		0
	Mass Reagents (kg or g)		0		Isolated?	Purity in percent?
	Mass Solvents (kg or g)		0
	Mass Aqueous (kg or g)		0		fill in ↑	fill in ↑
	Step R-factor		#DIV/0!			Batch No (PO) or Experiment Number
	Step PMI Substrate, Reagents, Solvents		#DIV/0!
	Step PMI Solvents		#DIV/0!		fill in ↑
	Step PMI Aqueous		#DIV/0!
	Step PMI		#DIV/0!		Insert comments here ...
	Cumulative R-factor		#DIV/0!
	Cumulative PMI Substrate, Reagents, Solvents		#DIV/0!
	Cumulative PMI Solvents		#DIV/0!
	Cumulative PMI Aqueous		#DIV/0!
	Cumulative PMI		#DIV/0!
	Number of chem. trans.; "0" for distillation, column, filtration, salting out, etc.:
	Intern or extern manufacturing:
	Technologies used in this sheet:				Inherited factors from side chains
					R-factor	Solvents	Aqueous
		fill in - drop down	fill in
	Step Function, Name-Number:
		Value	Units
	Substrate (amount added, batch size)		kg
	Substrate (assay)		wt%
	Substrate (actual amount)	0	kg
	Molar Yield (100% if this sheet is not populated)	1
	Product-Intermediate product (amount obtained, batch yield by weight)		kg
	Product-Intermediate product (assay)		wt%
	Actual amount of product-intermediate product	0	kg
	Raw Materials	Physical Charge	Units
	Substrates (as 100%) - if more than 2 substrates, add additional ones to reagents!
		0	kg
			kg
	Reagents (as 100%)
			kg
			kg
			kg
			kg
			kg
			kg
			kg
			kg
			kg
			kg
	Total mass of substrates and reagents	0	kg
	Solvents, incl. diluents of substrates
			kg
			kg
			kg
			kg
			kg
			kg
			kg
			kg
	... aqueous
			kg
			kg
			kg
			kg
			kg
			kg
			kg
	Total input material mass	0	kg
	PROCESS STEP METRICS
	Mass Substrate (kg or g)		0
	Mass Reagents (kg or g)		0		Isolated?	Purity in percent?
	Mass Solvents (kg or g)		0
	Mass Aqueous (kg or g)		0		fill in ↑	fill in ↑
	Step R-factor		#DIV/0!			Batch No (PO) or Experiment Number
	Step PMI Substrate, Reagents, Solvents		#DIV/0!
	Step PMI Solvents		#DIV/0!		fill in ↑
	Step PMI Aqueous		#DIV/0!
	Step PMI		#DIV/0!		Insert comments here ...
	Cumulative R-factor		#DIV/0!
	Cumulative PMI Substrate, Reagents, Solvents		#DIV/0!
	Cumulative PMI Solvents		#DIV/0!
	Cumulative PMI Aqueous		#DIV/0!
	Cumulative PMI		#DIV/0!
	Number of chem. trans.; "0" for distillation, column, filtration, salting out, etc.:
	Intern or extern manufacturing:
	Technologies used in this sheet:				Inherited factors from side chains
					R-factor	Solvents	Aqueous
		fill in - drop down	fill in
	Step Function, Name-Number:
		Value	Units
	Substrate (amount added, batch size)		kg
	Substrate (assay)		wt%
	Substrate (actual amount)	0	kg
	Molar Yield (100% if this sheet is not populated)	1
	Product-Intermediate product (amount obtained, batch yield by weight)		kg
	Product-Intermediate product (assay)		wt%
	Actual amount of product-intermediate product	0	kg
	Raw Materials	Physical Charge	Units
	Substrates (as 100%) - if more than 2 substrates, add additional ones to reagents!
		0	kg
			kg
	Reagents (as 100%)
			kg
			kg
			kg
			kg
			kg
			kg
			kg
			kg
			kg
			kg
	Total mass of substrates and reagents	0	kg
	Solvents, incl. diluents of substrates
			kg
			kg
			kg
			kg
			kg
			kg
			kg
			kg
	... aqueous
			kg
			kg
			kg
			kg
			kg
			kg
			kg
	Total input material mass	0	kg
	PROCESS STEP METRICS
	Mass Substrate (kg or g)		0
	Mass Reagents (kg or g)		0		Isolated?	Purity in percent?
	Mass Solvents (kg or g)		0
	Mass Aqueous (kg or g)		0		fill in ↑	fill in ↑
	Step R-factor		#DIV/0!			Batch No (PO) or Experiment Number
	Step PMI Substrate, Reagents, Solvents		#DIV/0!
	Step PMI Solvents		#DIV/0!		fill in ↑
	Step PMI Aqueous		#DIV/0!
	Step PMI		#DIV/0!		Insert comments here ...
	Cumulative R-factor		#DIV/0!
	Cumulative PMI Substrate, Reagents, Solvents		#DIV/0!
	Cumulative PMI Solvents		#DIV/0!
	Cumulative PMI Aqueous		#DIV/0!
	Cumulative PMI		#DIV/0!
	Number of chem. trans.; "0" for distillation, column, filtration, salting out, etc.:
	Intern or extern manufacturing:
	Technologies used in this sheet:				Inherited factors from side chains
					R-factor	Solvents	Aqueous
		fill in - drop down	fill in
	Step Function, Name-Number:
		Value	Units
	Substrate (amount added, batch size)		kg
	Substrate (assay)		wt%
	Substrate (actual amount)	0	kg
	Molar Yield (100% if this sheet is not populated)	1
	Product-Intermediate product (amount obtained, batch yield by weight)		kg
	Product-Intermediate product (assay)		wt%
	Actual amount of product-intermediate product	0	kg
	Raw Materials	Physical Charge	Units
	Substrates (as 100%) - if more than 2 substrates, add additional ones to reagents!
		0	kg
			kg
	Reagents (as 100%)
			kg
			kg
			kg
			kg
			kg
			kg
			kg
			kg
			kg
			kg
	Total mass of substrates and reagents	0	kg
	Solvents, incl. diluents of substrates
			kg
			kg
			kg
			kg
			kg
			kg
			kg
			kg
	... aqueous
			kg
			kg
			kg
			kg
			kg
			kg
			kg
	Total input material mass	0	kg
	PROCESS STEP METRICS
	Mass Substrate (kg or g)		0
	Mass Reagents (kg or g)		0		Isolated?	Purity in percent?
	Mass Solvents (kg or g)		0
	Mass Aqueous (kg or g)		0		fill in ↑	fill in ↑
	Step R-factor		#DIV/0!			Batch No (PO) or Experiment Number
	Step PMI Substrate, Reagents, Solvents		#DIV/0!
	Step PMI Solvents		#DIV/0!		fill in ↑
	Step PMI Aqueous		#DIV/0!
	Step PMI		#DIV/0!		Insert comments here ...
	Cumulative R-factor		#DIV/0!
	Cumulative PMI Substrate, Reagents, Solvents		#DIV/0!
	Cumulative PMI Solvents		#DIV/0!
	Cumulative PMI Aqueous		#DIV/0!
	Cumulative PMI		#DIV/0!
	Number of chem. trans.; "0" for distillation, column, filtration, salting out, etc.:
	Intern or extern manufacturing:
	Technologies used in this sheet:				Inherited factors from side chains
					R-factor	Solvents	Aqueous
		fill in - drop down	fill in
	Step Function, Name-Number:
		Value	Units
	Substrate (amount added, batch size)		kg
	Substrate (assay)		wt%
	Substrate (actual amount)	0	kg
	Molar Yield (100% if this sheet is not populated)	1
	Product-Intermediate product (amount obtained, batch yield by weight)		kg
	Product-Intermediate product (assay)		wt%
	Actual amount of product-intermediate product	0	kg
	Raw Materials	Physical Charge	Units
	Substrates (as 100%) - if more than 2 substrates, add additional ones to reagents!
		0	kg
			kg
	Reagents (as 100%)
			kg
			kg
			kg
			kg
			kg
			kg
			kg
			kg
			kg
			kg
	Total mass of substrates and reagents	0	kg
	Solvents, incl. diluents of substrates
			kg
			kg
			kg
			kg
			kg
			kg
			kg
			kg
	... aqueous
			kg
			kg
			kg
			kg
			kg
			kg
			kg
	Total input material mass	0	kg
	PROCESS STEP METRICS
	Mass Substrate (kg or g)		0
	Mass Reagents (kg or g)		0		Isolated?	Purity in percent?
	Mass Solvents (kg or g)		0
	Mass Aqueous (kg or g)		0		fill in ↑	fill in ↑
	Step R-factor		#DIV/0!			Batch No (PO) or Experiment Number
	Step PMI Substrate, Reagents, Solvents		#DIV/0!
	Step PMI Solvents		#DIV/0!		fill in ↑
	Step PMI Aqueous		#DIV/0!
	Step PMI		#DIV/0!		Insert comments here ...
	Cumulative R-factor		#DIV/0!
	Cumulative PMI Substrate, Reagents, Solvents		#DIV/0!
	Cumulative PMI Solvents		#DIV/0!
	Cumulative PMI Aqueous		#DIV/0!
	Cumulative PMI		#DIV/0!
	Number of chem. trans.; "0" for distillation, column, filtration, salting out, etc.:
	Intern or extern manufacturing:
	Technologies used in this sheet:				Inherited factors from side chains
					R-factor	Solvents	Aqueous
		fill in - drop down	fill in
	Step Function, Name-Number:
		Value	Units
	Substrate (amount added, batch size)		kg
	Substrate (assay)		wt%
	Substrate (actual amount)	0	kg
	Molar Yield (100% if this sheet is not populated)	1
	Product-Intermediate product (amount obtained, batch yield by weight)		kg
	Product-Intermediate product (assay)		wt%
	Actual amount of product-intermediate product	0	kg
	Raw Materials	Physical Charge	Units
	Substrates (as 100%) - if more than 2 substrates, add additional ones to reagents!
		0	kg
			kg
	Reagents (as 100%)
			kg
			kg
			kg
			kg
			kg
			kg
			kg
			kg
			kg
			kg
	Total mass of substrates and reagents	0	kg
	Solvents, incl. diluents of substrates
			kg
			kg
			kg
			kg
			kg
			kg
			kg
			kg
	... aqueous
			kg
			kg
			kg
			kg
			kg
			kg
			kg
	Total input material mass	0	kg
	PROCESS STEP METRICS
	Mass Substrate (kg or g)		0
	Mass Reagents (kg or g)		0		Isolated?	Purity in percent?
	Mass Solvents (kg or g)		0
	Mass Aqueous (kg or g)		0		fill in ↑	fill in ↑
	Step R-factor		#DIV/0!			Batch No (PO) or Experiment Number
	Step PMI Substrate, Reagents, Solvents		#DIV/0!
	Step PMI Solvents		#DIV/0!		fill in ↑
	Step PMI Aqueous		#DIV/0!
	Step PMI		#DIV/0!		Insert comments here ...
	Cumulative R-factor		#DIV/0!
	Cumulative PMI Substrate, Reagents, Solvents		#DIV/0!
	Cumulative PMI Solvents		#DIV/0!
	Cumulative PMI Aqueous		#DIV/0!
	Cumulative PMI		#DIV/0!
	Number of chem. trans.; "0" for distillation, column, filtration, salting out, etc.:
	Intern or extern manufacturing:
	Technologies used in this sheet:				Inherited factors from side chains
					R-factor	Solvents	Aqueous
		fill in - drop down	fill in
	Step Function, Name-Number:
		Value	Units
	Substrate (amount added, batch size)		kg
	Substrate (assay)		wt%
	Substrate (actual amount)	0	kg
	Molar Yield (100% if this sheet is not populated)	1
	Product-Intermediate product (amount obtained, batch yield by weight)		kg
	Product-Intermediate product (assay)		wt%
	Actual amount of product-intermediate product	0	kg
	Raw Materials	Physical Charge	Units
	Substrates (as 100%) - if more than 2 substrates, add additional ones to reagents!
		0	kg
			kg
	Reagents (as 100%)
			kg
			kg
			kg
			kg
			kg
			kg
			kg
			kg
			kg
			kg
	Total mass of substrates and reagents	0	kg
	Solvents, incl. diluents of substrates
			kg
			kg
			kg
			kg
			kg
			kg
			kg
			kg
	... aqueous
			kg
			kg
			kg
			kg
			kg
			kg
			kg
	Total input material mass	0	kg
	PROCESS STEP METRICS
	Mass Substrate (kg or g)		0
	Mass Reagents (kg or g)		0		Isolated?	Purity in percent?
	Mass Solvents (kg or g)		0
	Mass Aqueous (kg or g)		0		fill in ↑	fill in ↑
	Step R-factor		#DIV/0!			Batch No (PO) or Experiment Number
	Step PMI Substrate, Reagents, Solvents		#DIV/0!
	Step PMI Solvents		#DIV/0!		fill in ↑
	Step PMI Aqueous		#DIV/0!
	Step PMI		#DIV/0!		Insert comments here ...
	Cumulative R-factor		#DIV/0!
	Cumulative PMI Substrate, Reagents, Solvents		#DIV/0!
	Cumulative PMI Solvents		#DIV/0!
	Cumulative PMI Aqueous		#DIV/0!
	Cumulative PMI		#DIV/0!
	Number of chem. trans.; "0" for distillation, column, filtration, salting out, etc.:
	Intern or extern manufacturing:
	Technologies used in this sheet:				Inherited factors from side chains
					R-factor	Solvents	Aqueous
		fill in - drop down	fill in
	Step Function, Name-Number:
		Value	Units
	Substrate (amount added, batch size)		kg
	Substrate (assay)		wt%
	Substrate (actual amount)	0	kg
	Molar Yield (100% if this sheet is not populated)	1
	Product-Intermediate product (amount obtained, batch yield by weight)		kg
	Product-Intermediate product (assay)		wt%
	Actual amount of product-intermediate product	0	kg
	Raw Materials	Physical Charge	Units
	Substrates (as 100%) - if more than 2 substrates, add additional ones to reagents!
		0	kg
			kg
	Reagents (as 100%)
			kg
			kg
			kg
			kg
			kg
			kg
			kg
			kg
			kg
			kg
	Total mass of substrates and reagents	0	kg
	Solvents, incl. diluents of substrates
			kg
			kg
			kg
			kg
			kg
			kg
			kg
			kg
	... aqueous
			kg
			kg
			kg
			kg
			kg
			kg
			kg
	Total input material mass	0	kg
	PROCESS STEP METRICS
	Mass Substrate (kg or g)		0
	Mass Reagents (kg or g)		0		Isolated?	Purity in percent?
	Mass Solvents (kg or g)		0
	Mass Aqueous (kg or g)		0		fill in ↑	fill in ↑
	Step R-factor		#DIV/0!			Batch No (PO) or Experiment Number
	Step PMI Substrate, Reagents, Solvents		#DIV/0!
	Step PMI Solvents		#DIV/0!		fill in ↑
	Step PMI Aqueous		#DIV/0!
	Step PMI		#DIV/0!		Insert comments here ...
	Cumulative R-factor		#DIV/0!
	Cumulative PMI Substrate, Reagents, Solvents		#DIV/0!
	Cumulative PMI Solvents		#DIV/0!
	Cumulative PMI Aqueous		#DIV/0!
	Cumulative PMI		#DIV/0!
	Number of chem. trans.; "0" for distillation, column, filtration, salting out, etc.:
	Intern or extern manufacturing:
	Technologies used in this sheet:

## Sheet: Metrics template - side chain-b
	Step Function, Name-Number: SIDE CHAIN 1		RB(OH)2		Inherited factors from side chains
		Value	Units		R-factor	Solvents	Aqueous
	Substrate (amount added, batch size)	8.15	g
	Substrate (assay)	1	wt%
	Substrate (actual amount)	8.15	g
	Molar Yield	0.8
	Product-Intermediate product (amount obtained, batch yield by weight)	5.2	g
	Product-Intermediate product (assay)	1	wt%
	Actual amount of product-intermediate product	5.2	g
	Raw Materials	Physical Charge	Units
	Substrates (as 100%)
	3-Bromothiophene; CAS 872-31-1	8.15	g
			g
	Reagents (as 100%)
	n-BuLi; Pure n-BuLi from 2.5 M nBuLi in n-hexanes	3.20166	g										- It is assumed that the borate is diluted in 10 mL THF.
	Triisopropylborate; CAS 5419-55-6	9.403	g
			g
	HCl; Reaction quench; from 1 M HCl	3.6458	g
			g
	NaOH; Extraction; from 1 M NaOH	3.6	g
	HCl; Extraction; 2 mL HCl 36% assumed to set aq. phase to pH2	0.864	g
			g
	MgSO4; Extraction; assumed to be 5 wt.-% of 2nd Et2O portion	2.67375	g
			g
			g
	Total mass of substrates and reagents	31.5382	g
	Solvents, incl. diluents of substrates
	THF; Reaction	17.76	g
	n-Hexanes; Reaction; from 2.5 M n-BuLi solution	10.6583	g
	THF; Reaction; from B(OiPr)3 solution	8.88	g
			g
	Et2O; Extraction; assumed to be 50% of amount stated in protocol	124.775	g
	Et2O; Extraction; assumed to be 300 wt.-% of amount MgSO4 assumed	8.02125	g
			g
			g
	... aqueous
	H2O; Reaction quench; from 1 M HCl	102.204	g
			g
	H2O; Extraction; from 1 M NaOH	90	g
	H2O; Extraction; from 2 mL HCl 36%	1.536	g
	H2O; Extraction; from wash of org. phases; assumed to be 30 wt.-% of 2nd Et2O portion	53.475	g
			g
			g
			g
	Total input material mass	448.848	g
	PROCESS STEP METRICS
	Mass Substrate (kg or g)		8.15
	Mass Reagents (kg or g)		23.3882
	Mass Solvents (kg or g)		170.095
	Mass Aqueous (kg or g)		247.215
	Step R-factor		6.06504
	Step PMI Substrate, Reagents, Solvents		38.7755
	Step PMI Solvents		32.7105
	Step PMI Aqueous		47.5414
	Step PMI		86.3169
	Cumulative R-factor		6.06504
	Cumulative PMI Substrate, Reagents, Solvents		38.7755
	Cumulative PMI Solvents		32.7105
	Cumulative PMI Aqueous		47.5414
	Cumulative PMI		86.3169
		fill in - drop down	fill in
	Step Function, Name-Number:				Inherited factors from side chains
		Value	Units		R-factor	Solvents	Aqueous
	Substrate (amount added, batch size)		kg
	Substrate (assay)		wt%
	Substrate (actual amount)	0	kg
	Molar Yield (100% if this sheet is not populated)	1
	Product-Intermediate product (amount obtained, batch yield by weight)		kg
	Product-Intermediate product (assay)		wt%
	Actual amount of product-intermediate product	0	kg
	Raw Materials	Physical Charge	Units
	Substrates (as 100%) - if more than 2 substrates, add additional ones to reagents!
		0	kg
			kg
	Reagents (as 100%)
			kg
			kg
			kg
			kg
			kg
			kg
			kg
			kg
			kg
			kg
	Total mass of substrates and reagents	0	kg
	Solvents, incl. diluents of substrates
			kg
			kg
			kg
			kg
			kg
			kg
			kg
			kg
	... aqueous
			kg
			kg
			kg
			kg
			kg
			kg
			kg
	Total input material mass	0	kg
	PROCESS STEP METRICS
	Mass Substrate (kg or g)		0
	Mass Reagents (kg or g)		0
	Mass Solvents (kg or g)		0
	Mass Aqueous (kg or g)		0
	Step R-factor		#DIV/0!		Isolated?	Purity in percent?
	Step PMI Substrate, Reagents, Solvents		#DIV/0!
	Step PMI Solvents		#DIV/0!		fill in ↑	fill in ↑
	Step PMI Aqueous		#DIV/0!			Batch No (PO) or Experiment Number
	Step PMI		#DIV/0!
	Cumulative R-factor		#DIV/0!		fill in ↑
	Cumulative PMI Substrate, Reagents, Solvents		#DIV/0!
	Cumulative PMI Solvents		#DIV/0!		Insert comments here ...
	Cumulative PMI Aqueous		#DIV/0!
	Cumulative PMI		#DIV/0!
	Number of chem. trans.; "0" for distillation, column, filtration, salting out, etc.:
	Intern or extern manufacturing:
	Technologies used in this sheet:
		fill in - drop down	fill in
	Step Function, Name-Number:				Inherited factors from side chains
		Value	Units		R-factor	Solvents	Aqueous
	Substrate (amount added, batch size)		kg
	Substrate (assay)		wt%
	Substrate (actual amount)	0	kg
	Molar Yield (100% if this sheet is not populated)	1
	Product-Intermediate product (amount obtained, batch yield by weight)		kg
	Product-Intermediate product (assay)		wt%
	Actual amount of product-intermediate product	0	kg
	Raw Materials	Physical Charge	Units
	Substrates (as 100%) - if more than 2 substrates, add additional ones to reagents!
		0	kg
			kg
	Reagents (as 100%)
			kg
			kg
			kg
			kg
			kg
			kg
			kg
			kg
			kg
			kg
	Total mass of substrates and reagents	0	kg
	Solvents, incl. diluents of substrates
			kg
			kg
			kg
			kg
			kg
			kg
			kg
			kg
	... aqueous
			kg
			kg
			kg
			kg
			kg
			kg
			kg
	Total input material mass	0	kg
	PROCESS STEP METRICS
	Mass Substrate (kg or g)		0
	Mass Reagents (kg or g)		0
	Mass Solvents (kg or g)		0
	Mass Aqueous (kg or g)		0
	Step R-factor		#DIV/0!		Isolated?	Purity in percent?
	Step PMI Substrate, Reagents, Solvents		#DIV/0!
	Step PMI Solvents		#DIV/0!		fill in ↑	fill in ↑
	Step PMI Aqueous		#DIV/0!			Batch No (PO) or Experiment Number
	Step PMI		#DIV/0!
	Cumulative R-factor		#DIV/0!		fill in ↑
	Cumulative PMI Substrate, Reagents, Solvents		#DIV/0!
	Cumulative PMI Solvents		#DIV/0!		Insert comments here ...
	Cumulative PMI Aqueous		#DIV/0!
	Cumulative PMI		#DIV/0!
	Number of chem. trans.; "0" for distillation, column, filtration, salting out, etc.:
	Intern or extern manufacturing:
	Technologies used in this sheet:
		fill in - drop down	fill in
	Step Function, Name-Number:				Inherited factors from side chains
		Value	Units		R-factor	Solvents	Aqueous
	Substrate (amount added, batch size)		kg
	Substrate (assay)		wt%
	Substrate (actual amount)	0	kg
	Molar Yield (100% if this sheet is not populated)	1
	Product-Intermediate product (amount obtained, batch yield by weight)		kg
	Product-Intermediate product (assay)		wt%
	Actual amount of product-intermediate product	0	kg
	Raw Materials	Physical Charge	Units
	Substrates (as 100%) - if more than 2 substrates, add additional ones to reagents!
		0	kg
			kg
	Reagents (as 100%)
			kg
			kg
			kg
			kg
			kg
			kg
			kg
			kg
			kg
			kg
	Total mass of substrates and reagents	0	kg
	Solvents, incl. diluents of substrates
			kg
			kg
			kg
			kg
			kg
			kg
			kg
			kg
	... aqueous
			kg
			kg
			kg
			kg
			kg
			kg
			kg
	Total input material mass	0	kg
	PROCESS STEP METRICS
	Mass Substrate (kg or g)		0
	Mass Reagents (kg or g)		0
	Mass Solvents (kg or g)		0
	Mass Aqueous (kg or g)		0
	Step R-factor		#DIV/0!		Isolated?	Purity in percent?
	Step PMI Substrate, Reagents, Solvents		#DIV/0!
	Step PMI Solvents		#DIV/0!		fill in ↑	fill in ↑
	Step PMI Aqueous		#DIV/0!			Batch No (PO) or Experiment Number
	Step PMI		#DIV/0!
	Cumulative R-factor		#DIV/0!		fill in ↑
	Cumulative PMI Substrate, Reagents, Solvents		#DIV/0!
	Cumulative PMI Solvents		#DIV/0!		Insert comments here ...
	Cumulative PMI Aqueous		#DIV/0!
	Cumulative PMI		#DIV/0!
	Number of chem. trans.; "0" for distillation, column, filtration, salting out, etc.:
	Intern or extern manufacturing:
	Technologies used in this sheet:
		fill in - drop down	fill in
	Step Function, Name-Number:				Inherited factors from side chains
		Value	Units		R-factor	Solvents	Aqueous
	Substrate (amount added, batch size)		kg
	Substrate (assay)		wt%
	Substrate (actual amount)	0	kg
	Molar Yield (100% if this sheet is not populated)	1
	Product-Intermediate product (amount obtained, batch yield by weight)		kg
	Product-Intermediate product (assay)		wt%
	Actual amount of product-intermediate product	0	kg
	Raw Materials	Physical Charge	Units
	Substrates (as 100%) - if more than 2 substrates, add additional ones to reagents!
		0	kg
			kg
	Reagents (as 100%)
			kg
			kg
			kg
			kg
			kg
			kg
			kg
			kg
			kg
			kg
	Total mass of substrates and reagents	0	kg
	Solvents, incl. diluents of substrates
			kg
			kg
			kg
			kg
			kg
			kg
			kg
			kg
	... aqueous
			kg
			kg
			kg
			kg
			kg
			kg
			kg
	Total input material mass	0	kg
	PROCESS STEP METRICS
	Mass Substrate (kg or g)		0
	Mass Reagents (kg or g)		0
	Mass Solvents (kg or g)		0
	Mass Aqueous (kg or g)		0
	Step R-factor		#DIV/0!		Isolated?	Purity in percent?
	Step PMI Substrate, Reagents, Solvents		#DIV/0!
	Step PMI Solvents		#DIV/0!		fill in ↑	fill in ↑
	Step PMI Aqueous		#DIV/0!			Batch No (PO) or Experiment Number
	Step PMI		#DIV/0!
	Cumulative R-factor		#DIV/0!		fill in ↑
	Cumulative PMI Substrate, Reagents, Solvents		#DIV/0!
	Cumulative PMI Solvents		#DIV/0!		Insert comments here ...
	Cumulative PMI Aqueous		#DIV/0!
	Cumulative PMI		#DIV/0!
	Number of chem. trans.; "0" for distillation, column, filtration, salting out, etc.:
	Intern or extern manufacturing:
	Technologies used in this sheet:
		fill in - drop down	fill in
	Step Function, Name-Number:				Inherited factors from side chains
		Value	Units		R-factor	Solvents	Aqueous
	Substrate (amount added, batch size)		kg
	Substrate (assay)		wt%
	Substrate (actual amount)	0	kg
	Molar Yield (100% if this sheet is not populated)	1
	Product-Intermediate product (amount obtained, batch yield by weight)		kg
	Product-Intermediate product (assay)		wt%
	Actual amount of product-intermediate product	0	kg
	Raw Materials	Physical Charge	Units
	Substrates (as 100%) - if more than 2 substrates, add additional ones to reagents!
		0	kg
			kg
	Reagents (as 100%)
			kg
			kg
			kg
			kg
			kg
			kg
			kg
			kg
			kg
			kg
	Total mass of substrates and reagents	0	kg
	Solvents, incl. diluents of substrates
			kg
			kg
			kg
			kg
			kg
			kg
			kg
			kg
	... aqueous
			kg
			kg
			kg
			kg
			kg
			kg
			kg
	Total input material mass	0	kg
	PROCESS STEP METRICS
	Mass Substrate (kg or g)		0
	Mass Reagents (kg or g)		0
	Mass Solvents (kg or g)		0
	Mass Aqueous (kg or g)		0
	Step R-factor		#DIV/0!		Isolated?	Purity in percent?
	Step PMI Substrate, Reagents, Solvents		#DIV/0!
	Step PMI Solvents		#DIV/0!		fill in ↑	fill in ↑
	Step PMI Aqueous		#DIV/0!			Batch No (PO) or Experiment Number
	Step PMI		#DIV/0!
	Cumulative R-factor		#DIV/0!		fill in ↑
	Cumulative PMI Substrate, Reagents, Solvents		#DIV/0!
	Cumulative PMI Solvents		#DIV/0!		Insert comments here ...
	Cumulative PMI Aqueous		#DIV/0!
	Cumulative PMI		#DIV/0!
	Number of chem. trans.; "0" for distillation, column, filtration, salting out, etc.:
	Intern or extern manufacturing:
	Technologies used in this sheet:
		fill in - drop down	fill in
	Step Function, Name-Number:				Inherited factors from side chains
		Value	Units		R-factor	Solvents	Aqueous
	Substrate (amount added, batch size)		kg
	Substrate (assay)		wt%
	Substrate (actual amount)	0	kg
	Molar Yield (100% if this sheet is not populated)	1
	Product-Intermediate product (amount obtained, batch yield by weight)		kg
	Product-Intermediate product (assay)		wt%
	Actual amount of product-intermediate product	0	kg
	Raw Materials	Physical Charge	Units
	Substrates (as 100%) - if more than 2 substrates, add additional ones to reagents!
		0	kg
			kg
	Reagents (as 100%)
			kg
			kg
			kg
			kg
			kg
			kg
			kg
			kg
			kg
			kg
	Total mass of substrates and reagents	0	kg
	Solvents, incl. diluents of substrates
			kg
			kg
			kg
			kg
			kg
			kg
			kg
			kg
	... aqueous
			kg
			kg
			kg
			kg
			kg
			kg
			kg
	Total input material mass	0	kg
	PROCESS STEP METRICS
	Mass Substrate (kg or g)		0
	Mass Reagents (kg or g)		0
	Mass Solvents (kg or g)		0
	Mass Aqueous (kg or g)		0
	Step R-factor		#DIV/0!		Isolated?	Purity in percent?
	Step PMI Substrate, Reagents, Solvents		#DIV/0!
	Step PMI Solvents		#DIV/0!		fill in ↑	fill in ↑
	Step PMI Aqueous		#DIV/0!			Batch No (PO) or Experiment Number
	Step PMI		#DIV/0!
	Cumulative R-factor		#DIV/0!		fill in ↑
	Cumulative PMI Substrate, Reagents, Solvents		#DIV/0!
	Cumulative PMI Solvents		#DIV/0!		Insert comments here ...
	Cumulative PMI Aqueous		#DIV/0!
	Cumulative PMI		#DIV/0!
	Number of chem. trans.; "0" for distillation, column, filtration, salting out, etc.:
	Intern or extern manufacturing:
	Technologies used in this sheet:
		fill in - drop down	fill in
	Step Function, Name-Number:				Inherited factors from side chains
		Value	Units		R-factor	Solvents	Aqueous
	Substrate (amount added, batch size)		kg
	Substrate (assay)		wt%
	Substrate (actual amount)	0	kg
	Molar Yield (100% if this sheet is not populated)	1
	Product-Intermediate product (amount obtained, batch yield by weight)		kg
	Product-Intermediate product (assay)		wt%
	Actual amount of product-intermediate product	0	kg
	Raw Materials	Physical Charge	Units
	Substrates (as 100%) - if more than 2 substrates, add additional ones to reagents!
		0	kg
			kg
	Reagents (as 100%)
			kg
			kg
			kg
			kg
			kg
			kg
			kg
			kg
			kg
			kg
	Total mass of substrates and reagents	0	kg
	Solvents, incl. diluents of substrates
			kg
			kg
			kg
			kg
			kg
			kg
			kg
			kg
	... aqueous
			kg
			kg
			kg
			kg
			kg
			kg
			kg
	Total input material mass	0	kg
	PROCESS STEP METRICS
	Mass Substrate (kg or g)		0
	Mass Reagents (kg or g)		0
	Mass Solvents (kg or g)		0
	Mass Aqueous (kg or g)		0
	Step R-factor		#DIV/0!		Isolated?	Purity in percent?
	Step PMI Substrate, Reagents, Solvents		#DIV/0!
	Step PMI Solvents		#DIV/0!		fill in ↑	fill in ↑
	Step PMI Aqueous		#DIV/0!			Batch No (PO) or Experiment Number
	Step PMI		#DIV/0!
	Cumulative R-factor		#DIV/0!		fill in ↑
	Cumulative PMI Substrate, Reagents, Solvents		#DIV/0!
	Cumulative PMI Solvents		#DIV/0!		Insert comments here ...
	Cumulative PMI Aqueous		#DIV/0!
	Cumulative PMI		#DIV/0!
	Number of chem. trans.; "0" for distillation, column, filtration, salting out, etc.:
	Intern or extern manufacturing:
	Technologies used in this sheet:
		fill in - drop down	fill in
	Step Function, Name-Number:				Inherited factors from side chains
		Value	Units		R-factor	Solvents	Aqueous
	Substrate (amount added, batch size)		kg
	Substrate (assay)		wt%
	Substrate (actual amount)	0	kg
	Molar Yield (100% if this sheet is not populated)	1
	Product-Intermediate product (amount obtained, batch yield by weight)		kg
	Product-Intermediate product (assay)		wt%
	Actual amount of product-intermediate product	0	kg
	Raw Materials	Physical Charge	Units
	Substrates (as 100%) - if more than 2 substrates, add additional ones to reagents!
		0	kg
			kg
	Reagents (as 100%)
			kg
			kg
			kg
			kg
			kg
			kg
			kg
			kg
			kg
			kg
	Total mass of substrates and reagents	0	kg
	Solvents, incl. diluents of substrates
			kg
			kg
			kg
			kg
			kg
			kg
			kg
			kg
	... aqueous
			kg
			kg
			kg
			kg
			kg
			kg
			kg
	Total input material mass	0	kg
	PROCESS STEP METRICS
	Mass Substrate (kg or g)		0
	Mass Reagents (kg or g)		0
	Mass Solvents (kg or g)		0
	Mass Aqueous (kg or g)		0
	Step R-factor		#DIV/0!		Isolated?	Purity in percent?
	Step PMI Substrate, Reagents, Solvents		#DIV/0!
	Step PMI Solvents		#DIV/0!		fill in ↑	fill in ↑
	Step PMI Aqueous		#DIV/0!			Batch No (PO) or Experiment Number
	Step PMI		#DIV/0!
	Cumulative R-factor		#DIV/0!		fill in ↑
	Cumulative PMI Substrate, Reagents, Solvents		#DIV/0!
	Cumulative PMI Solvents		#DIV/0!		Insert comments here ...
	Cumulative PMI Aqueous		#DIV/0!
	Cumulative PMI		#DIV/0!
	Number of chem. trans.; "0" for distillation, column, filtration, salting out, etc.:
	Intern or extern manufacturing:
	Technologies used in this sheet:
		fill in - drop down	fill in
	Step Function, Name-Number:				Inherited factors from side chains
		Value	Units		R-factor	Solvents	Aqueous
	Substrate (amount added, batch size)		kg
	Substrate (assay)		wt%
	Substrate (actual amount)	0	kg
	Molar Yield (100% if this sheet is not populated)	1
	Product-Intermediate product (amount obtained, batch yield by weight)		kg
	Product-Intermediate product (assay)		wt%
	Actual amount of product-intermediate product	0	kg
	Raw Materials	Physical Charge	Units
	Substrates (as 100%) - if more than 2 substrates, add additional ones to reagents!
		0	kg
			kg
	Reagents (as 100%)
			kg
			kg
			kg
			kg
			kg
			kg
			kg
			kg
			kg
			kg
	Total mass of substrates and reagents	0	kg
	Solvents, incl. diluents of substrates
			kg
			kg
			kg
			kg
			kg
			kg
			kg
			kg
	... aqueous
			kg
			kg
			kg
			kg
			kg
			kg
			kg
	Total input material mass	0	kg
	PROCESS STEP METRICS
	Mass Substrate (kg or g)		0
	Mass Reagents (kg or g)		0
	Mass Solvents (kg or g)		0
	Mass Aqueous (kg or g)		0
	Step R-factor		#DIV/0!		Isolated?	Purity in percent?
	Step PMI Substrate, Reagents, Solvents		#DIV/0!
	Step PMI Solvents		#DIV/0!		fill in ↑	fill in ↑
	Step PMI Aqueous		#DIV/0!			Batch No (PO) or Experiment Number
	Step PMI		#DIV/0!
	Cumulative R-factor		#DIV/0!		fill in ↑
	Cumulative PMI Substrate, Reagents, Solvents		#DIV/0!
	Cumulative PMI Solvents		#DIV/0!		Insert comments here ...
	Cumulative PMI Aqueous		#DIV/0!
	Cumulative PMI		#DIV/0!
	Number of chem. trans.; "0" for distillation, column, filtration, salting out, etc.:
	Intern or extern manufacturing:
	Technologies used in this sheet:

## Sheet: Metrics template - side chain2b
	Step Function, Name-Number: SIDE CHAIN 2		Sphos		Inherited factors from side chains								J. Am. Chem. Soc. 2005, 127, 13, 4685–4696
		Value	Units		R-factor	Solvents	Aqueous
	Substrate (amount added, batch size)	2.6208	g
	Substrate (assay)	1	wt%
	Substrate (actual amount)	2.6208	g
	Molar Yield	0.59
	Product-Intermediate product (amount obtained, batch yield by weight)	3.32	g
	Product-Intermediate product (assay)	1	wt%
	Actual amount of product-intermediate product	3.32	g
	Raw Materials	Physical Charge	Units
	Substrates (as 100%)
	2-Bromochlorobenzene; CAS 694-80-4; d 1.638 g mL-1	2.6208	g
	1.3-Dimethoxybenzene; CAS 151-10-0; d 1.055 g mL-1	2.11	g
	Reagents (as 100%)
	n-BuLi; Pure n-BuLi from 2.5 M nBuLi in n-hexanes	0.992515	g
	n-BuLi; Pure n-BuLi from 2.5 M nBuLi in n-hexanes	0.992515	g
	Chlorodicyclohexylphosphine; CAS 16523-54-9, d 1.054 g mL-1	3.19362	g
			g
			g
	SiO2; Filtration; assumed to be 0.3 g SiO2 per mmol 2-bromochlorobenzene	4.11	g
	Cellulose acetate; Filtration; assumed to be 10 wt.-% to SiO2	0.411	g
			g
			g
			g
			g
	Total mass of substrates and reagents	14.4304	g
	Solvents, incl. diluents of substrates
	THF; Reaction	31.08	g
	n-Hexanes; Reaction; from 2.5 M n-BuLi solution	3.30409	g
	n-Hexanes; Reaction; from 2.5 M n-BuLi solution	3.30409	g
			g
	EtOAc; Filtration; assumed to be 50% of amount stated in protocol	180.4	g
			g
	Acetone; Recrystallizations; assumed to be 50 mL	40	g
	MeOH; Recrystallization; trituration assumed to be 5 mL	4	g
	... aqueous
			g
			g
			g
			g
			g
			g
			g
			g
	Total input material mass	276.519	g
	PROCESS STEP METRICS
	Mass Substrate (kg or g)		4.7308
	Mass Reagents (kg or g)		9.69965
	Mass Solvents (kg or g)		262.088
	Mass Aqueous (kg or g)		0
	Step R-factor		4.34652
	Step PMI Substrate, Reagents, Solvents		83.2887
	Step PMI Solvents		78.9422
	Step PMI Aqueous		0
	Step PMI		83.2887
	Cumulative R-factor		4.34652
	Cumulative PMI Substrate, Reagents, Solvents		83.2887
	Cumulative PMI Solvents		78.9422
	Cumulative PMI Aqueous		0
	Cumulative PMI		83.2887
	Step Function, Name-Number:		Nano cat.		Inherited factors from side chains								Science 2015, 349, 1087–1091.
		Value	Units		R-factor	Solvents	Aqueous
	Substrate (amount added, batch size)	1.015	g
	Substrate (assay)	1	wt%
	Substrate (actual amount)	1.015	g
	Molar Yield (100% if this sheet is not populated)	1
	Product-Intermediate product (amount obtained, batch yield by weight)	2.7	g
	Product-Intermediate product (assay)	1	wt%
	Actual amount of product-intermediate product	2.7	g
	Raw Materials	Physical Charge	Units
	Substrates (as 100%)
	Sphos	1.015	g
			g
	Reagents (as 100%)
	FeCl3; CAS 7705-08-0	0.5	g
	Pd(OAc)2; CAS 3375-31-3	0.006	g
	MeMgCl; Pure MeMgCl from 0.5 M MeMgCl in THF	0.462202	g
			g
			g
			g
			g
			g
			g
			g										- It is assumed that the borate is diluted in 10 mL THF.
			g
	Total mass of substrates and reagents	1.9832	g
	Solvents, incl. diluents of substrates
	THF; Reaction	7.112	g
	THF; Reaction; from 0.5 M MeMgCl solution	10.988	g
			g
	Pentanes; Trituration; assumed to be 1000 wt.-% of mass of isolated material	27	g
			g
			g
			g
			g
	... aqueous
	H2O; Reaction quench	0.1	g
			g
			g
			g
			g
			g
			g
			g
	Total input material mass	47.1832	g
	PROCESS STEP METRICS
	Mass Substrate (kg or g)		1.015
	Mass Reagents (kg or g)		0.968202
	Mass Solvents (kg or g)		45.1
	Mass Aqueous (kg or g)		0.1
	Step R-factor		0.734519
	Step PMI Substrate, Reagents, Solvents		17.4382
	Step PMI Solvents		16.7037
	Step PMI Aqueous		0.037037
	Step PMI		17.4753
	Cumulative R-factor		1.99256
	Cumulative PMI Substrate, Reagents, Solvents		48.3727
	Cumulative PMI Solvents		46.3801
	Cumulative PMI Aqueous		0.037037
	Cumulative PMI		48.4097
		fill in - drop down	fill in
	Step Function, Name-Number:				Inherited factors from side chains
		Value	Units		R-factor	Solvents	Aqueous
	Substrate (amount added, batch size)		kg
	Substrate (assay)		wt%
	Substrate (actual amount)	0	kg
	Molar Yield (100% if this sheet is not populated)	1
	Product-Intermediate product (amount obtained, batch yield by weight)		kg
	Product-Intermediate product (assay)		wt%
	Actual amount of product-intermediate product	0	kg
	Raw Materials	Physical Charge	Units
	Substrates (as 100%) - if more than 2 substrates, add additional ones to reagents!
		0	kg
			kg
	Reagents (as 100%)
			kg
			kg
			kg
			kg
			kg
			kg
			kg
			kg
			kg
			kg
	Total mass of substrates and reagents	0	kg
	Solvents, incl. diluents of substrates
			kg
			kg
			kg
			kg
			kg
			kg
			kg
			kg
	... aqueous
			kg
			kg
			kg
			kg
			kg
			kg
			kg
	Total input material mass	0	kg
	PROCESS STEP METRICS
	Mass Substrate (kg or g)		0
	Mass Reagents (kg or g)		0
	Mass Solvents (kg or g)		0
	Mass Aqueous (kg or g)		0
	Step R-factor		#DIV/0!		Isolated?	Purity in percent?
	Step PMI Substrate, Reagents, Solvents		#DIV/0!
	Step PMI Solvents		#DIV/0!		fill in ↑	fill in ↑
	Step PMI Aqueous		#DIV/0!			Batch No (PO) or Experiment Number
	Step PMI		#DIV/0!
	Cumulative R-factor		#DIV/0!		fill in ↑
	Cumulative PMI Substrate, Reagents, Solvents		#DIV/0!
	Cumulative PMI Solvents		#DIV/0!		Insert comments here ...
	Cumulative PMI Aqueous		#DIV/0!
	Cumulative PMI		#DIV/0!
	Number of chem. trans.; "0" for distillation, column, filtration, salting out, etc.:
	Intern or extern manufacturing:
	Technologies used in this sheet:
		fill in - drop down	fill in
	Step Function, Name-Number:				Inherited factors from side chains
		Value	Units		R-factor	Solvents	Aqueous
	Substrate (amount added, batch size)		kg
	Substrate (assay)		wt%
	Substrate (actual amount)	0	kg
	Molar Yield (100% if this sheet is not populated)	1
	Product-Intermediate product (amount obtained, batch yield by weight)		kg
	Product-Intermediate product (assay)		wt%
	Actual amount of product-intermediate product	0	kg
	Raw Materials	Physical Charge	Units
	Substrates (as 100%) - if more than 2 substrates, add additional ones to reagents!
		0	kg
			kg
	Reagents (as 100%)
			kg
			kg
			kg
			kg
			kg
			kg
			kg
			kg
			kg
			kg
	Total mass of substrates and reagents	0	kg
	Solvents, incl. diluents of substrates
			kg
			kg
			kg
			kg
			kg
			kg
			kg
			kg
	... aqueous
			kg
			kg
			kg
			kg
			kg
			kg
			kg
	Total input material mass	0	kg
	PROCESS STEP METRICS
	Mass Substrate (kg or g)		0
	Mass Reagents (kg or g)		0
	Mass Solvents (kg or g)		0
	Mass Aqueous (kg or g)		0
	Step R-factor		#DIV/0!		Isolated?	Purity in percent?
	Step PMI Substrate, Reagents, Solvents		#DIV/0!
	Step PMI Solvents		#DIV/0!		fill in ↑	fill in ↑
	Step PMI Aqueous		#DIV/0!			Batch No (PO) or Experiment Number
	Step PMI		#DIV/0!
	Cumulative R-factor		#DIV/0!		fill in ↑
	Cumulative PMI Substrate, Reagents, Solvents		#DIV/0!
	Cumulative PMI Solvents		#DIV/0!		Insert comments here ...
	Cumulative PMI Aqueous		#DIV/0!
	Cumulative PMI		#DIV/0!
	Number of chem. trans.; "0" for distillation, column, filtration, salting out, etc.:
	Intern or extern manufacturing:
	Technologies used in this sheet:
		fill in - drop down	fill in
	Step Function, Name-Number:				Inherited factors from side chains
		Value	Units		R-factor	Solvents	Aqueous
	Substrate (amount added, batch size)		kg
	Substrate (assay)		wt%
	Substrate (actual amount)	0	kg
	Molar Yield (100% if this sheet is not populated)	1
	Product-Intermediate product (amount obtained, batch yield by weight)		kg
	Product-Intermediate product (assay)		wt%
	Actual amount of product-intermediate product	0	kg
	Raw Materials	Physical Charge	Units
	Substrates (as 100%) - if more than 2 substrates, add additional ones to reagents!
		0	kg
			kg
	Reagents (as 100%)
			kg
			kg
			kg
			kg
			kg
			kg
			kg
			kg
			kg
			kg
	Total mass of substrates and reagents	0	kg
	Solvents, incl. diluents of substrates
			kg
			kg
			kg
			kg
			kg
			kg
			kg
			kg
	... aqueous
			kg
			kg
			kg
			kg
			kg
			kg
			kg
	Total input material mass	0	kg
	PROCESS STEP METRICS
	Mass Substrate (kg or g)		0
	Mass Reagents (kg or g)		0
	Mass Solvents (kg or g)		0
	Mass Aqueous (kg or g)		0
	Step R-factor		#DIV/0!		Isolated?	Purity in percent?
	Step PMI Substrate, Reagents, Solvents		#DIV/0!
	Step PMI Solvents		#DIV/0!		fill in ↑	fill in ↑
	Step PMI Aqueous		#DIV/0!			Batch No (PO) or Experiment Number
	Step PMI		#DIV/0!
	Cumulative R-factor		#DIV/0!		fill in ↑
	Cumulative PMI Substrate, Reagents, Solvents		#DIV/0!
	Cumulative PMI Solvents		#DIV/0!		Insert comments here ...
	Cumulative PMI Aqueous		#DIV/0!
	Cumulative PMI		#DIV/0!
	Number of chem. trans.; "0" for distillation, column, filtration, salting out, etc.:
	Intern or extern manufacturing:
	Technologies used in this sheet:
		fill in - drop down	fill in
	Step Function, Name-Number:				Inherited factors from side chains
		Value	Units		R-factor	Solvents	Aqueous
	Substrate (amount added, batch size)		kg
	Substrate (assay)		wt%
	Substrate (actual amount)	0	kg
	Molar Yield (100% if this sheet is not populated)	1
	Product-Intermediate product (amount obtained, batch yield by weight)		kg
	Product-Intermediate product (assay)		wt%
	Actual amount of product-intermediate product	0	kg
	Raw Materials	Physical Charge	Units
	Substrates (as 100%) - if more than 2 substrates, add additional ones to reagents!
		0	kg
			kg
	Reagents (as 100%)
			kg
			kg
			kg
			kg
			kg
			kg
			kg
			kg
			kg
			kg
	Total mass of substrates and reagents	0	kg
	Solvents, incl. diluents of substrates
			kg
			kg
			kg
			kg
			kg
			kg
			kg
			kg
	... aqueous
			kg
			kg
			kg
			kg
			kg
			kg
			kg
	Total input material mass	0	kg
	PROCESS STEP METRICS
	Mass Substrate (kg or g)		0
	Mass Reagents (kg or g)		0
	Mass Solvents (kg or g)		0
	Mass Aqueous (kg or g)		0
	Step R-factor		#DIV/0!		Isolated?	Purity in percent?
	Step PMI Substrate, Reagents, Solvents		#DIV/0!
	Step PMI Solvents		#DIV/0!		fill in ↑	fill in ↑
	Step PMI Aqueous		#DIV/0!			Batch No (PO) or Experiment Number
	Step PMI		#DIV/0!
	Cumulative R-factor		#DIV/0!		fill in ↑
	Cumulative PMI Substrate, Reagents, Solvents		#DIV/0!
	Cumulative PMI Solvents		#DIV/0!		Insert comments here ...
	Cumulative PMI Aqueous		#DIV/0!
	Cumulative PMI		#DIV/0!
	Number of chem. trans.; "0" for distillation, column, filtration, salting out, etc.:
	Intern or extern manufacturing:
	Technologies used in this sheet:
		fill in - drop down	fill in
	Step Function, Name-Number:				Inherited factors from side chains
		Value	Units		R-factor	Solvents	Aqueous
	Substrate (amount added, batch size)		kg
	Substrate (assay)		wt%
	Substrate (actual amount)	0	kg
	Molar Yield (100% if this sheet is not populated)	1
	Product-Intermediate product (amount obtained, batch yield by weight)		kg
	Product-Intermediate product (assay)		wt%
	Actual amount of product-intermediate product	0	kg
	Raw Materials	Physical Charge	Units
	Substrates (as 100%) - if more than 2 substrates, add additional ones to reagents!
		0	kg
			kg
	Reagents (as 100%)
			kg
			kg
			kg
			kg
			kg
			kg
			kg
			kg
			kg
			kg
	Total mass of substrates and reagents	0	kg
	Solvents, incl. diluents of substrates
			kg
			kg
			kg
			kg
			kg
			kg
			kg
			kg
	... aqueous
			kg
			kg
			kg
			kg
			kg
			kg
			kg
	Total input material mass	0	kg
	PROCESS STEP METRICS
	Mass Substrate (kg or g)		0
	Mass Reagents (kg or g)		0
	Mass Solvents (kg or g)		0
	Mass Aqueous (kg or g)		0
	Step R-factor		#DIV/0!		Isolated?	Purity in percent?
	Step PMI Substrate, Reagents, Solvents		#DIV/0!
	Step PMI Solvents		#DIV/0!		fill in ↑	fill in ↑
	Step PMI Aqueous		#DIV/0!			Batch No (PO) or Experiment Number
	Step PMI		#DIV/0!
	Cumulative R-factor		#DIV/0!		fill in ↑
	Cumulative PMI Substrate, Reagents, Solvents		#DIV/0!
	Cumulative PMI Solvents		#DIV/0!		Insert comments here ...
	Cumulative PMI Aqueous		#DIV/0!
	Cumulative PMI		#DIV/0!
	Number of chem. trans.; "0" for distillation, column, filtration, salting out, etc.:
	Intern or extern manufacturing:
	Technologies used in this sheet:
		fill in - drop down	fill in
	Step Function, Name-Number:				Inherited factors from side chains
		Value	Units		R-factor	Solvents	Aqueous
	Substrate (amount added, batch size)		kg
	Substrate (assay)		wt%
	Substrate (actual amount)	0	kg
	Molar Yield (100% if this sheet is not populated)	1
	Product-Intermediate product (amount obtained, batch yield by weight)		kg
	Product-Intermediate product (assay)		wt%
	Actual amount of product-intermediate product	0	kg
	Raw Materials	Physical Charge	Units
	Substrates (as 100%) - if more than 2 substrates, add additional ones to reagents!
		0	kg
			kg
	Reagents (as 100%)
			kg
			kg
			kg
			kg
			kg
			kg
			kg
			kg
			kg
			kg
	Total mass of substrates and reagents	0	kg
	Solvents, incl. diluents of substrates
			kg
			kg
			kg
			kg
			kg
			kg
			kg
			kg
	... aqueous
			kg
			kg
			kg
			kg
			kg
			kg
			kg
	Total input material mass	0	kg
	PROCESS STEP METRICS
	Mass Substrate (kg or g)		0
	Mass Reagents (kg or g)		0
	Mass Solvents (kg or g)		0
	Mass Aqueous (kg or g)		0
	Step R-factor		#DIV/0!		Isolated?	Purity in percent?
	Step PMI Substrate, Reagents, Solvents		#DIV/0!
	Step PMI Solvents		#DIV/0!		fill in ↑	fill in ↑
	Step PMI Aqueous		#DIV/0!			Batch No (PO) or Experiment Number
	Step PMI		#DIV/0!
	Cumulative R-factor		#DIV/0!		fill in ↑
	Cumulative PMI Substrate, Reagents, Solvents		#DIV/0!
	Cumulative PMI Solvents		#DIV/0!		Insert comments here ...
	Cumulative PMI Aqueous		#DIV/0!
	Cumulative PMI		#DIV/0!
	Number of chem. trans.; "0" for distillation, column, filtration, salting out, etc.:
	Intern or extern manufacturing:
	Technologies used in this sheet:
		fill in - drop down	fill in
	Step Function, Name-Number:				Inherited factors from side chains
		Value	Units		R-factor	Solvents	Aqueous
	Substrate (amount added, batch size)		kg
	Substrate (assay)		wt%
	Substrate (actual amount)	0	kg
	Molar Yield (100% if this sheet is not populated)	1
	Product-Intermediate product (amount obtained, batch yield by weight)		kg
	Product-Intermediate product (assay)		wt%
	Actual amount of product-intermediate product	0	kg
	Raw Materials	Physical Charge	Units
	Substrates (as 100%) - if more than 2 substrates, add additional ones to reagents!
		0	kg
			kg
	Reagents (as 100%)
			kg
			kg
			kg
			kg
			kg
			kg
			kg
			kg
			kg
			kg
	Total mass of substrates and reagents	0	kg
	Solvents, incl. diluents of substrates
			kg
			kg
			kg
			kg
			kg
			kg
			kg
			kg
	... aqueous
			kg
			kg
			kg
			kg
			kg
			kg
			kg
	Total input material mass	0	kg
	PROCESS STEP METRICS
	Mass Substrate (kg or g)		0
	Mass Reagents (kg or g)		0
	Mass Solvents (kg or g)		0
	Mass Aqueous (kg or g)		0
	Step R-factor		#DIV/0!		Isolated?	Purity in percent?
	Step PMI Substrate, Reagents, Solvents		#DIV/0!
	Step PMI Solvents		#DIV/0!		fill in ↑	fill in ↑
	Step PMI Aqueous		#DIV/0!			Batch No (PO) or Experiment Number
	Step PMI		#DIV/0!
	Cumulative R-factor		#DIV/0!		fill in ↑
	Cumulative PMI Substrate, Reagents, Solvents		#DIV/0!
	Cumulative PMI Solvents		#DIV/0!		Insert comments here ...
	Cumulative PMI Aqueous		#DIV/0!
	Cumulative PMI		#DIV/0!
	Number of chem. trans.; "0" for distillation, column, filtration, salting out, etc.:
	Intern or extern manufacturing:
	Technologies used in this sheet:
		fill in - drop down	fill in
	Step Function, Name-Number:				Inherited factors from side chains
		Value	Units		R-factor	Solvents	Aqueous
	Substrate (amount added, batch size)		kg
	Substrate (assay)		wt%
	Substrate (actual amount)	0	kg
	Molar Yield (100% if this sheet is not populated)	1
	Product-Intermediate product (amount obtained, batch yield by weight)		kg
	Product-Intermediate product (assay)		wt%
	Actual amount of product-intermediate product	0	kg
	Raw Materials	Physical Charge	Units
	Substrates (as 100%) - if more than 2 substrates, add additional ones to reagents!
		0	kg
			kg
	Reagents (as 100%)
			kg
			kg
			kg
			kg
			kg
			kg
			kg
			kg
			kg
			kg
	Total mass of substrates and reagents	0	kg
	Solvents, incl. diluents of substrates
			kg
			kg
			kg
			kg
			kg
			kg
			kg
			kg
	... aqueous
			kg
			kg
			kg
			kg
			kg
			kg
			kg
	Total input material mass	0	kg
	PROCESS STEP METRICS
	Mass Substrate (kg or g)		0
	Mass Reagents (kg or g)		0
	Mass Solvents (kg or g)		0
	Mass Aqueous (kg or g)		0
	Step R-factor		#DIV/0!		Isolated?	Purity in percent?
	Step PMI Substrate, Reagents, Solvents		#DIV/0!
	Step PMI Solvents		#DIV/0!		fill in ↑	fill in ↑
	Step PMI Aqueous		#DIV/0!			Batch No (PO) or Experiment Number
	Step PMI		#DIV/0!
	Cumulative R-factor		#DIV/0!		fill in ↑
	Cumulative PMI Substrate, Reagents, Solvents		#DIV/0!
	Cumulative PMI Solvents		#DIV/0!		Insert comments here ...
	Cumulative PMI Aqueous		#DIV/0!
	Cumulative PMI		#DIV/0!
	Number of chem. trans.; "0" for distillation, column, filtration, salting out, etc.:
	Intern or extern manufacturing:
	Technologies used in this sheet:

## Sheet: Metrics template - side chain3b
	Step Function, Name-Number: SIDE CHAIN 3		Toc. Succ.		Inherited factors from side chains
		Value	Units		R-factor	Solvents	Aqueous
	Substrate (amount added, batch size)	66.4	g
	Substrate (assay)	1	wt%
	Substrate (actual amount)	66.4	g
	Molar Yield	0.969
	Product-Intermediate product (amount obtained, batch yield by weight)	79.26	g
	Product-Intermediate product (assay)	1	wt%
	Actual amount of product-intermediate product	79.26	g
	Raw Materials	Physical Charge	Units
	Substrates (as 100%)
	Tocopherol; CAS 10191-41-0	66.4	g
	Succinic anhydride; CAS 108-30-5	23.1	g
	Reagents (as 100%)
	4-Dimethylaminopyridine; CAS 1122-58-3	9.4	g
	Triethylamine; CAS 121-44-8	15.609	g
			g
	HCl; Extraction; from 1 M HCl	17.4998	g
	NaCl; Extraction; from brine wash of org. phases	75.125	g
			g
	Na2SO4; Extraction; assumed to be 3 wt.-% of CH2Cl2	23.94	g
			g
	SiO2; Purification	600	g
			g
	Total mass of substrates and reagents	831.074	g
	Solvents, incl. diluents of substrates
	CH2Cl2; Reaction	399	g
			g
	CH2Cl2; Flask rinse; Extraction	399	g
			g
	CH2Cl2; Purification	1995	g
	EtOAc; Purification; assumed to be 300 wt.-% of amount SiO2	1353	g
	n-Hexanes; Purification; assumed to be 300 wt.-% of amount SiO2	991.5	g
			g
	... aqueous
	H2O; Extraction; from 1 M HCl	490.58	g
	H2O; Extraction	200	g
	H2O; Extraction; from brine wash of org. Phases	225.375	g
			g
			g
			g
			g
	Total input material mass	6884.53	g
	PROCESS STEP METRICS
	Mass Substrate (kg or g)		89.5
	Mass Reagents (kg or g)		741.574
	Mass Solvents (kg or g)		5137.5
	Mass Aqueous (kg or g)		915.955
	Step R-factor		10.4854
	Step PMI Substrate, Reagents, Solvents		75.3037
	Step PMI Solvents		64.8183
	Step PMI Aqueous		11.5563
	Step PMI		86.8601																	- Brine assumed to be 25 wt.-% NaCl and 75 wt.-% H2O
	Cumulative R-factor		10.4854
	Cumulative PMI Substrate, Reagents, Solvents		75.3037
	Cumulative PMI Solvents		64.8183
	Cumulative PMI Aqueous		11.5563
	Cumulative PMI		86.8601
	Step Function, Name-Number:		TPGS		Inherited factors from side chains
		Value	Units		R-factor	Solvents	Aqueous
	Substrate (amount added, batch size)	82.56	g
	Substrate (assay)	0.96	wt%
	Substrate (actual amount)	79.2576	g
	Molar Yield (100% if this sheet is not populated)	1
	Product-Intermediate product (amount obtained, batch yield by weight)	174.11	g
	Product-Intermediate product (assay)	1	wt%
	Actual amount of product-intermediate product	174.11	g
	Raw Materials	Physical Charge	Units
	Substrates (as 100%)
	Tocopherol succinate	79.2576	g
	MPEG 750; CAS 9004-74-4	109.5	g
	Reagents (as 100%)
	PTSA monohydrate; CAS 6192-52-5	3.01	g
			g
	Al2O3; Filtration	600	g
			g
			g
			g
			g
			g
			g
			g
			g
	Total mass of substrates and reagents	791.768	g
	Solvents, incl. diluents of substrates
	Toluene; Reaction	485.52	g
			g
	CH2Cl2; Filtration	3990	g
			g
			g
			g
			g
			g
	... aqueous
			g
			g
			g
			g
			g
			g
			g
			g
	Total input material mass	5267.29	g
	PROCESS STEP METRICS
	Mass Substrate (kg or g)		188.758
	Mass Reagents (kg or g)		603.01
	Mass Solvents (kg or g)		4475.52
	Mass Aqueous (kg or g)		0
	Step R-factor		4.54751
	Step PMI Substrate, Reagents, Solvents		30.2526
	Step PMI Solvents		25.7051
	Step PMI Aqueous		0
	Step PMI		30.2526
	Cumulative R-factor		8.86542
	Cumulative PMI Substrate, Reagents, Solvents		64.0769
	Cumulative PMI Solvents		55.2114
	Cumulative PMI Aqueous		5.26063
	Cumulative PMI		69.3375
		fill in - drop down	fill in
	Step Function, Name-Number:				Inherited factors from side chains
		Value	Units		R-factor	Solvents	Aqueous
	Substrate (amount added, batch size)		kg
	Substrate (assay)		wt%
	Substrate (actual amount)	0	kg
	Molar Yield (100% if this sheet is not populated)	1
	Product-Intermediate product (amount obtained, batch yield by weight)		kg
	Product-Intermediate product (assay)		wt%
	Actual amount of product-intermediate product	0	kg
	Raw Materials	Physical Charge	Units
	Substrates (as 100%) - if more than 2 substrates, add additional ones to reagents!
		0	kg
			kg
	Reagents (as 100%)
			kg
			kg
			kg
			kg
			kg
			kg
			kg
			kg
			kg
			kg
	Total mass of substrates and reagents	0	kg
	Solvents, incl. diluents of substrates
			kg
			kg
			kg
			kg
			kg
			kg
			kg
			kg
	... aqueous
			kg
			kg
			kg
			kg
			kg
			kg
			kg
	Total input material mass	0	kg
	PROCESS STEP METRICS
	Mass Substrate (kg or g)		0
	Mass Reagents (kg or g)		0
	Mass Solvents (kg or g)		0
	Mass Aqueous (kg or g)		0
	Step R-factor		#DIV/0!		Isolated?	Purity in percent?
	Step PMI Substrate, Reagents, Solvents		#DIV/0!
	Step PMI Solvents		#DIV/0!		fill in ↑	fill in ↑
	Step PMI Aqueous		#DIV/0!			Batch No (PO) or Experiment Number
	Step PMI		#DIV/0!
	Cumulative R-factor		#DIV/0!		fill in ↑
	Cumulative PMI Substrate, Reagents, Solvents		#DIV/0!
	Cumulative PMI Solvents		#DIV/0!		Insert comments here ...
	Cumulative PMI Aqueous		#DIV/0!
	Cumulative PMI		#DIV/0!
	Number of chem. trans.; "0" for distillation, column, filtration, salting out, etc.:
	Intern or extern manufacturing:
	Technologies used in this sheet:
		fill in - drop down	fill in
	Step Function, Name-Number:				Inherited factors from side chains
		Value	Units		R-factor	Solvents	Aqueous
	Substrate (amount added, batch size)		kg
	Substrate (assay)		wt%
	Substrate (actual amount)	0	kg
	Molar Yield (100% if this sheet is not populated)	1
	Product-Intermediate product (amount obtained, batch yield by weight)		kg
	Product-Intermediate product (assay)		wt%
	Actual amount of product-intermediate product	0	kg
	Raw Materials	Physical Charge	Units
	Substrates (as 100%) - if more than 2 substrates, add additional ones to reagents!
		0	kg
			kg
	Reagents (as 100%)
			kg
			kg
			kg
			kg
			kg
			kg
			kg
			kg
			kg
			kg
	Total mass of substrates and reagents	0	kg
	Solvents, incl. diluents of substrates
			kg
			kg
			kg
			kg
			kg
			kg
			kg
			kg
	... aqueous
			kg
			kg
			kg
			kg
			kg
			kg
			kg
	Total input material mass	0	kg
	PROCESS STEP METRICS
	Mass Substrate (kg or g)		0
	Mass Reagents (kg or g)		0
	Mass Solvents (kg or g)		0
	Mass Aqueous (kg or g)		0
	Step R-factor		#DIV/0!		Isolated?	Purity in percent?
	Step PMI Substrate, Reagents, Solvents		#DIV/0!
	Step PMI Solvents		#DIV/0!		fill in ↑	fill in ↑
	Step PMI Aqueous		#DIV/0!			Batch No (PO) or Experiment Number
	Step PMI		#DIV/0!
	Cumulative R-factor		#DIV/0!		fill in ↑
	Cumulative PMI Substrate, Reagents, Solvents		#DIV/0!
	Cumulative PMI Solvents		#DIV/0!		Insert comments here ...
	Cumulative PMI Aqueous		#DIV/0!
	Cumulative PMI		#DIV/0!
	Number of chem. trans.; "0" for distillation, column, filtration, salting out, etc.:
	Intern or extern manufacturing:
	Technologies used in this sheet:
		fill in - drop down	fill in
	Step Function, Name-Number:				Inherited factors from side chains
		Value	Units		R-factor	Solvents	Aqueous
	Substrate (amount added, batch size)		kg
	Substrate (assay)		wt%
	Substrate (actual amount)	0	kg
	Molar Yield (100% if this sheet is not populated)	1
	Product-Intermediate product (amount obtained, batch yield by weight)		kg
	Product-Intermediate product (assay)		wt%
	Actual amount of product-intermediate product	0	kg
	Raw Materials	Physical Charge	Units
	Substrates (as 100%) - if more than 2 substrates, add additional ones to reagents!
		0	kg
			kg
	Reagents (as 100%)
			kg
			kg
			kg
			kg
			kg
			kg
			kg
			kg
			kg
			kg
	Total mass of substrates and reagents	0	kg
	Solvents, incl. diluents of substrates
			kg
			kg
			kg
			kg
			kg
			kg
			kg
			kg
	... aqueous
			kg
			kg
			kg
			kg
			kg
			kg
			kg
	Total input material mass	0	kg
	PROCESS STEP METRICS
	Mass Substrate (kg or g)		0
	Mass Reagents (kg or g)		0
	Mass Solvents (kg or g)		0
	Mass Aqueous (kg or g)		0
	Step R-factor		#DIV/0!		Isolated?	Purity in percent?
	Step PMI Substrate, Reagents, Solvents		#DIV/0!
	Step PMI Solvents		#DIV/0!		fill in ↑	fill in ↑
	Step PMI Aqueous		#DIV/0!			Batch No (PO) or Experiment Number
	Step PMI		#DIV/0!
	Cumulative R-factor		#DIV/0!		fill in ↑
	Cumulative PMI Substrate, Reagents, Solvents		#DIV/0!
	Cumulative PMI Solvents		#DIV/0!		Insert comments here ...
	Cumulative PMI Aqueous		#DIV/0!
	Cumulative PMI		#DIV/0!
	Number of chem. trans.; "0" for distillation, column, filtration, salting out, etc.:
	Intern or extern manufacturing:
	Technologies used in this sheet:
		fill in - drop down	fill in
	Step Function, Name-Number:				Inherited factors from side chains
		Value	Units		R-factor	Solvents	Aqueous
	Substrate (amount added, batch size)		kg
	Substrate (assay)		wt%
	Substrate (actual amount)	0	kg
	Molar Yield (100% if this sheet is not populated)	1
	Product-Intermediate product (amount obtained, batch yield by weight)		kg
	Product-Intermediate product (assay)		wt%
	Actual amount of product-intermediate product	0	kg
	Raw Materials	Physical Charge	Units
	Substrates (as 100%) - if more than 2 substrates, add additional ones to reagents!
		0	kg
			kg
	Reagents (as 100%)
			kg
			kg
			kg
			kg
			kg
			kg
			kg
			kg
			kg
			kg
	Total mass of substrates and reagents	0	kg
	Solvents, incl. diluents of substrates
			kg
			kg
			kg
			kg
			kg
			kg
			kg
			kg
	... aqueous
			kg
			kg
			kg
			kg
			kg
			kg
			kg
	Total input material mass	0	kg
	PROCESS STEP METRICS
	Mass Substrate (kg or g)		0
	Mass Reagents (kg or g)		0
	Mass Solvents (kg or g)		0
	Mass Aqueous (kg or g)		0
	Step R-factor		#DIV/0!		Isolated?	Purity in percent?
	Step PMI Substrate, Reagents, Solvents		#DIV/0!
	Step PMI Solvents		#DIV/0!		fill in ↑	fill in ↑
	Step PMI Aqueous		#DIV/0!			Batch No (PO) or Experiment Number
	Step PMI		#DIV/0!
	Cumulative R-factor		#DIV/0!		fill in ↑
	Cumulative PMI Substrate, Reagents, Solvents		#DIV/0!
	Cumulative PMI Solvents		#DIV/0!		Insert comments here ...
	Cumulative PMI Aqueous		#DIV/0!
	Cumulative PMI		#DIV/0!
	Number of chem. trans.; "0" for distillation, column, filtration, salting out, etc.:
	Intern or extern manufacturing:
	Technologies used in this sheet:
		fill in - drop down	fill in
	Step Function, Name-Number:				Inherited factors from side chains
		Value	Units		R-factor	Solvents	Aqueous
	Substrate (amount added, batch size)		kg
	Substrate (assay)		wt%
	Substrate (actual amount)	0	kg
	Molar Yield (100% if this sheet is not populated)	1
	Product-Intermediate product (amount obtained, batch yield by weight)		kg
	Product-Intermediate product (assay)		wt%
	Actual amount of product-intermediate product	0	kg
	Raw Materials	Physical Charge	Units
	Substrates (as 100%) - if more than 2 substrates, add additional ones to reagents!
		0	kg
			kg
	Reagents (as 100%)
			kg
			kg
			kg
			kg
			kg
			kg
			kg
			kg
			kg
			kg
	Total mass of substrates and reagents	0	kg
	Solvents, incl. diluents of substrates
			kg
			kg
			kg
			kg
			kg
			kg
			kg
			kg
	... aqueous
			kg
			kg
			kg
			kg
			kg
			kg
			kg
	Total input material mass	0	kg
	PROCESS STEP METRICS
	Mass Substrate (kg or g)		0
	Mass Reagents (kg or g)		0
	Mass Solvents (kg or g)		0
	Mass Aqueous (kg or g)		0
	Step R-factor		#DIV/0!		Isolated?	Purity in percent?
	Step PMI Substrate, Reagents, Solvents		#DIV/0!
	Step PMI Solvents		#DIV/0!		fill in ↑	fill in ↑
	Step PMI Aqueous		#DIV/0!			Batch No (PO) or Experiment Number
	Step PMI		#DIV/0!
	Cumulative R-factor		#DIV/0!		fill in ↑
	Cumulative PMI Substrate, Reagents, Solvents		#DIV/0!
	Cumulative PMI Solvents		#DIV/0!		Insert comments here ...
	Cumulative PMI Aqueous		#DIV/0!
	Cumulative PMI		#DIV/0!
	Number of chem. trans.; "0" for distillation, column, filtration, salting out, etc.:
	Intern or extern manufacturing:
	Technologies used in this sheet:
		fill in - drop down	fill in
	Step Function, Name-Number:				Inherited factors from side chains
		Value	Units		R-factor	Solvents	Aqueous
	Substrate (amount added, batch size)		kg
	Substrate (assay)		wt%
	Substrate (actual amount)	0	kg
	Molar Yield (100% if this sheet is not populated)	1
	Product-Intermediate product (amount obtained, batch yield by weight)		kg
	Product-Intermediate product (assay)		wt%
	Actual amount of product-intermediate product	0	kg
	Raw Materials	Physical Charge	Units
	Substrates (as 100%) - if more than 2 substrates, add additional ones to reagents!
		0	kg
			kg
	Reagents (as 100%)
			kg
			kg
			kg
			kg
			kg
			kg
			kg
			kg
			kg
			kg
	Total mass of substrates and reagents	0	kg
	Solvents, incl. diluents of substrates
			kg
			kg
			kg
			kg
			kg
			kg
			kg
			kg
	... aqueous
			kg
			kg
			kg
			kg
			kg
			kg
			kg
	Total input material mass	0	kg
	PROCESS STEP METRICS
	Mass Substrate (kg or g)		0
	Mass Reagents (kg or g)		0
	Mass Solvents (kg or g)		0
	Mass Aqueous (kg or g)		0
	Step R-factor		#DIV/0!		Isolated?	Purity in percent?
	Step PMI Substrate, Reagents, Solvents		#DIV/0!
	Step PMI Solvents		#DIV/0!		fill in ↑	fill in ↑
	Step PMI Aqueous		#DIV/0!			Batch No (PO) or Experiment Number
	Step PMI		#DIV/0!
	Cumulative R-factor		#DIV/0!		fill in ↑
	Cumulative PMI Substrate, Reagents, Solvents		#DIV/0!
	Cumulative PMI Solvents		#DIV/0!		Insert comments here ...
	Cumulative PMI Aqueous		#DIV/0!
	Cumulative PMI		#DIV/0!
	Number of chem. trans.; "0" for distillation, column, filtration, salting out, etc.:
	Intern or extern manufacturing:
	Technologies used in this sheet:
		fill in - drop down	fill in
	Step Function, Name-Number:				Inherited factors from side chains
		Value	Units		R-factor	Solvents	Aqueous
	Substrate (amount added, batch size)		kg
	Substrate (assay)		wt%
	Substrate (actual amount)	0	kg
	Molar Yield (100% if this sheet is not populated)	1
	Product-Intermediate product (amount obtained, batch yield by weight)		kg
	Product-Intermediate product (assay)		wt%
	Actual amount of product-intermediate product	0	kg
	Raw Materials	Physical Charge	Units
	Substrates (as 100%) - if more than 2 substrates, add additional ones to reagents!
		0	kg
			kg
	Reagents (as 100%)
			kg
			kg
			kg
			kg
			kg
			kg
			kg
			kg
			kg
			kg
	Total mass of substrates and reagents	0	kg
	Solvents, incl. diluents of substrates
			kg
			kg
			kg
			kg
			kg
			kg
			kg
			kg
	... aqueous
			kg
			kg
			kg
			kg
			kg
			kg
			kg
	Total input material mass	0	kg
	PROCESS STEP METRICS
	Mass Substrate (kg or g)		0
	Mass Reagents (kg or g)		0
	Mass Solvents (kg or g)		0
	Mass Aqueous (kg or g)		0
	Step R-factor		#DIV/0!		Isolated?	Purity in percent?
	Step PMI Substrate, Reagents, Solvents		#DIV/0!
	Step PMI Solvents		#DIV/0!		fill in ↑	fill in ↑
	Step PMI Aqueous		#DIV/0!			Batch No (PO) or Experiment Number
	Step PMI		#DIV/0!
	Cumulative R-factor		#DIV/0!		fill in ↑
	Cumulative PMI Substrate, Reagents, Solvents		#DIV/0!
	Cumulative PMI Solvents		#DIV/0!		Insert comments here ...
	Cumulative PMI Aqueous		#DIV/0!
	Cumulative PMI		#DIV/0!
	Number of chem. trans.; "0" for distillation, column, filtration, salting out, etc.:
	Intern or extern manufacturing:
	Technologies used in this sheet:
		fill in - drop down	fill in
	Step Function, Name-Number:				Inherited factors from side chains
		Value	Units		R-factor	Solvents	Aqueous
	Substrate (amount added, batch size)		kg
	Substrate (assay)		wt%
	Substrate (actual amount)	0	kg
	Molar Yield (100% if this sheet is not populated)	1
	Product-Intermediate product (amount obtained, batch yield by weight)		kg
	Product-Intermediate product (assay)		wt%
	Actual amount of product-intermediate product	0	kg
	Raw Materials	Physical Charge	Units
	Substrates (as 100%) - if more than 2 substrates, add additional ones to reagents!
		0	kg
			kg
	Reagents (as 100%)
			kg
			kg
			kg
			kg
			kg
			kg
			kg
			kg
			kg
			kg
	Total mass of substrates and reagents	0	kg
	Solvents, incl. diluents of substrates
			kg
			kg
			kg
			kg
			kg
			kg
			kg
			kg
	... aqueous
			kg
			kg
			kg
			kg
			kg
			kg
			kg
	Total input material mass	0	kg
	PROCESS STEP METRICS
	Mass Substrate (kg or g)		0
	Mass Reagents (kg or g)		0
	Mass Solvents (kg or g)		0
	Mass Aqueous (kg or g)		0
	Step R-factor		#DIV/0!		Isolated?	Purity in percent?
	Step PMI Substrate, Reagents, Solvents		#DIV/0!
	Step PMI Solvents		#DIV/0!		fill in ↑	fill in ↑
	Step PMI Aqueous		#DIV/0!			Batch No (PO) or Experiment Number
	Step PMI		#DIV/0!
	Cumulative R-factor		#DIV/0!		fill in ↑
	Cumulative PMI Substrate, Reagents, Solvents		#DIV/0!
	Cumulative PMI Solvents		#DIV/0!		Insert comments here ...
	Cumulative PMI Aqueous		#DIV/0!
	Cumulative PMI		#DIV/0!
	Number of chem. trans.; "0" for distillation, column, filtration, salting out, etc.:
	Intern or extern manufacturing:
	Technologies used in this sheet:
		fill in - drop down	fill in
	Step Function, Name-Number:				Inherited factors from side chains
		Value	Units		R-factor	Solvents	Aqueous
	Substrate (amount added, batch size)		kg
	Substrate (assay)		wt%
	Substrate (actual amount)	0	kg
	Molar Yield (100% if this sheet is not populated)	1
	Product-Intermediate product (amount obtained, batch yield by weight)		kg
	Product-Intermediate product (assay)		wt%
	Actual amount of product-intermediate product	0	kg
	Raw Materials	Physical Charge	Units
	Substrates (as 100%) - if more than 2 substrates, add additional ones to reagents!
		0	kg
			kg
	Reagents (as 100%)
			kg
			kg
			kg
			kg
			kg
			kg
			kg
			kg
			kg
			kg
	Total mass of substrates and reagents	0	kg
	Solvents, incl. diluents of substrates
			kg
			kg
			kg
			kg
			kg
			kg
			kg
			kg
	... aqueous
			kg
			kg
			kg
			kg
			kg
			kg
			kg
	Total input material mass	0	kg
	PROCESS STEP METRICS
	Mass Substrate (kg or g)		0
	Mass Reagents (kg or g)		0
	Mass Solvents (kg or g)		0
	Mass Aqueous (kg or g)		0
	Step R-factor		#DIV/0!		Isolated?	Purity in percent?
	Step PMI Substrate, Reagents, Solvents		#DIV/0!
	Step PMI Solvents		#DIV/0!		fill in ↑	fill in ↑
	Step PMI Aqueous		#DIV/0!			Batch No (PO) or Experiment Number
	Step PMI		#DIV/0!
	Cumulative R-factor		#DIV/0!		fill in ↑
	Cumulative PMI Substrate, Reagents, Solvents		#DIV/0!
	Cumulative PMI Solvents		#DIV/0!		Insert comments here ...
	Cumulative PMI Aqueous		#DIV/0!
	Cumulative PMI		#DIV/0!
	Number of chem. trans.; "0" for distillation, column, filtration, salting out, etc.:
	Intern or extern manufacturing:
	Technologies used in this sheet:
		fill in - drop down	fill in
	Step Function, Name-Number:				Inherited factors from side chains
		Value	Units		R-factor	Solvents	Aqueous
	Substrate (amount added, batch size)		kg
	Substrate (assay)		wt%
	Substrate (actual amount)	0	kg
	Molar Yield (100% if this sheet is not populated)	1
	Product-Intermediate product (amount obtained, batch yield by weight)		kg
	Product-Intermediate product (assay)		wt%
	Actual amount of product-intermediate product	0	kg
	Raw Materials	Physical Charge	Units
	Substrates (as 100%) - if more than 2 substrates, add additional ones to reagents!
		0	kg
			kg
	Reagents (as 100%)
			kg
			kg
			kg
			kg
			kg
			kg
			kg
			kg
			kg
			kg
	Total mass of substrates and reagents	0	kg
	Solvents, incl. diluents of substrates
			kg
			kg
			kg
			kg
			kg
			kg
			kg
			kg
	... aqueous
			kg
			kg
			kg
			kg
			kg
			kg
			kg
	Total input material mass	0	kg
	PROCESS STEP METRICS
	Mass Substrate (kg or g)		0
	Mass Reagents (kg or g)		0
	Mass Solvents (kg or g)		0
	Mass Aqueous (kg or g)		0
	Step R-factor		#DIV/0!		Isolated?	Purity in percent?
	Step PMI Substrate, Reagents, Solvents		#DIV/0!
	Step PMI Solvents		#DIV/0!		fill in ↑	fill in ↑
	Step PMI Aqueous		#DIV/0!			Batch No (PO) or Experiment Number
	Step PMI		#DIV/0!
	Cumulative R-factor		#DIV/0!		fill in ↑
	Cumulative PMI Substrate, Reagents, Solvents		#DIV/0!
	Cumulative PMI Solvents		#DIV/0!		Insert comments here ...
	Cumulative PMI Aqueous		#DIV/0!
	Cumulative PMI		#DIV/0!
	Number of chem. trans.; "0" for distillation, column, filtration, salting out, etc.:
	Intern or extern manufacturing:
	Technologies used in this sheet:
		fill in - drop down	fill in
	Step Function, Name-Number:				Inherited factors from side chains
		Value	Units		R-factor	Solvents	Aqueous
	Substrate (amount added, batch size)		kg
	Substrate (assay)		wt%
	Substrate (actual amount)	0	kg
	Molar Yield (100% if this sheet is not populated)	1
	Product-Intermediate product (amount obtained, batch yield by weight)		kg
	Product-Intermediate product (assay)		wt%
	Actual amount of product-intermediate product	0	kg
	Raw Materials	Physical Charge	Units
	Substrates (as 100%) - if more than 2 substrates, add additional ones to reagents!
		0	kg
			kg
	Reagents (as 100%)
			kg
			kg
			kg
			kg
			kg
			kg
			kg
			kg
			kg
			kg
	Total mass of substrates and reagents	0	kg
	Solvents, incl. diluents of substrates
			kg
			kg
			kg
			kg
			kg
			kg
			kg
			kg
	... aqueous
			kg
			kg
			kg
			kg
			kg
			kg
			kg
	Total input material mass	0	kg
	PROCESS STEP METRICS
	Mass Substrate (kg or g)		0
	Mass Reagents (kg or g)		0
	Mass Solvents (kg or g)		0
	Mass Aqueous (kg or g)		0
	Step R-factor		#DIV/0!		Isolated?	Purity in percent?
	Step PMI Substrate, Reagents, Solvents		#DIV/0!
	Step PMI Solvents		#DIV/0!		fill in ↑	fill in ↑
	Step PMI Aqueous		#DIV/0!			Batch No (PO) or Experiment Number
	Step PMI		#DIV/0!
	Cumulative R-factor		#DIV/0!		fill in ↑
	Cumulative PMI Substrate, Reagents, Solvents		#DIV/0!
	Cumulative PMI Solvents		#DIV/0!		Insert comments here ...
	Cumulative PMI Aqueous		#DIV/0!
	Cumulative PMI		#DIV/0!
	Number of chem. trans.; "0" for distillation, column, filtration, salting out, etc.:
	Intern or extern manufacturing:
	Technologies used in this sheet:
		fill in - drop down	fill in
	Step Function, Name-Number:				Inherited factors from side chains
		Value	Units		R-factor	Solvents	Aqueous
	Substrate (amount added, batch size)		kg
	Substrate (assay)		wt%
	Substrate (actual amount)	0	kg
	Molar Yield (100% if this sheet is not populated)	1
	Product-Intermediate product (amount obtained, batch yield by weight)		kg
	Product-Intermediate product (assay)		wt%
	Actual amount of product-intermediate product	0	kg
	Raw Materials	Physical Charge	Units
	Substrates (as 100%) - if more than 2 substrates, add additional ones to reagents!
		0	kg
			kg
	Reagents (as 100%)
			kg
			kg
			kg
			kg
			kg
			kg
			kg
			kg
			kg
			kg
	Total mass of substrates and reagents	0	kg
	Solvents, incl. diluents of substrates
			kg
			kg
			kg
			kg
			kg
			kg
			kg
			kg
	... aqueous
			kg
			kg
			kg
			kg
			kg
			kg
			kg
	Total input material mass	0	kg
	PROCESS STEP METRICS
	Mass Substrate (kg or g)		0
	Mass Reagents (kg or g)		0
	Mass Solvents (kg or g)		0
	Mass Aqueous (kg or g)		0
	Step R-factor		#DIV/0!		Isolated?	Purity in percent?
	Step PMI Substrate, Reagents, Solvents		#DIV/0!
	Step PMI Solvents		#DIV/0!		fill in ↑	fill in ↑
	Step PMI Aqueous		#DIV/0!			Batch No (PO) or Experiment Number
	Step PMI		#DIV/0!
	Cumulative R-factor		#DIV/0!		fill in ↑
	Cumulative PMI Substrate, Reagents, Solvents		#DIV/0!
	Cumulative PMI Solvents		#DIV/0!		Insert comments here ...
	Cumulative PMI Aqueous		#DIV/0!
	Cumulative PMI		#DIV/0!
	Number of chem. trans.; "0" for distillation, column, filtration, salting out, etc.:
	Intern or extern manufacturing:
	Technologies used in this sheet:
		fill in - drop down	fill in
	Step Function, Name-Number:				Inherited factors from side chains
		Value	Units		R-factor	Solvents	Aqueous
	Substrate (amount added, batch size)		kg
	Substrate (assay)		wt%
	Substrate (actual amount)	0	kg
	Molar Yield (100% if this sheet is not populated)	1
	Product-Intermediate product (amount obtained, batch yield by weight)		kg
	Product-Intermediate product (assay)		wt%
	Actual amount of product-intermediate product	0	kg
	Raw Materials	Physical Charge	Units
	Substrates (as 100%) - if more than 2 substrates, add additional ones to reagents!
		0	kg
			kg
	Reagents (as 100%)
			kg
			kg
			kg
			kg
			kg
			kg
			kg
			kg
			kg
			kg
	Total mass of substrates and reagents	0	kg
	Solvents, incl. diluents of substrates
			kg
			kg
			kg
			kg
			kg
			kg
			kg
			kg
	... aqueous
			kg
			kg
			kg
			kg
			kg
			kg
			kg
	Total input material mass	0	kg
	PROCESS STEP METRICS
	Mass Substrate (kg or g)		0
	Mass Reagents (kg or g)		0
	Mass Solvents (kg or g)		0
	Mass Aqueous (kg or g)		0
	Step R-factor		#DIV/0!		Isolated?	Purity in percent?
	Step PMI Substrate, Reagents, Solvents		#DIV/0!
	Step PMI Solvents		#DIV/0!		fill in ↑	fill in ↑
	Step PMI Aqueous		#DIV/0!			Batch No (PO) or Experiment Number
	Step PMI		#DIV/0!
	Cumulative R-factor		#DIV/0!		fill in ↑
	Cumulative PMI Substrate, Reagents, Solvents		#DIV/0!
	Cumulative PMI Solvents		#DIV/0!		Insert comments here ...
	Cumulative PMI Aqueous		#DIV/0!
	Cumulative PMI		#DIV/0!
	Number of chem. trans.; "0" for distillation, column, filtration, salting out, etc.:
	Intern or extern manufacturing:
	Technologies used in this sheet:
		fill in - drop down	fill in
	Step Function, Name-Number:				Inherited factors from side chains
		Value	Units		R-factor	Solvents	Aqueous
	Substrate (amount added, batch size)		kg
	Substrate (assay)		wt%
	Substrate (actual amount)	0	kg
	Molar Yield (100% if this sheet is not populated)	1
	Product-Intermediate product (amount obtained, batch yield by weight)		kg
	Product-Intermediate product (assay)		wt%
	Actual amount of product-intermediate product	0	kg
	Raw Materials	Physical Charge	Units
	Substrates (as 100%) - if more than 2 substrates, add additional ones to reagents!
		0	kg
			kg
	Reagents (as 100%)
			kg
			kg
			kg
			kg
			kg
			kg
			kg
			kg
			kg
			kg
	Total mass of substrates and reagents	0	kg
	Solvents, incl. diluents of substrates
			kg
			kg
			kg
			kg
			kg
			kg
			kg
			kg
	... aqueous
			kg
			kg
			kg
			kg
			kg
			kg
			kg
	Total input material mass	0	kg
	PROCESS STEP METRICS
	Mass Substrate (kg or g)		0
	Mass Reagents (kg or g)		0
	Mass Solvents (kg or g)		0
	Mass Aqueous (kg or g)		0
	Step R-factor		#DIV/0!		Isolated?	Purity in percent?
	Step PMI Substrate, Reagents, Solvents		#DIV/0!
	Step PMI Solvents		#DIV/0!		fill in ↑	fill in ↑
	Step PMI Aqueous		#DIV/0!			Batch No (PO) or Experiment Number
	Step PMI		#DIV/0!
	Cumulative R-factor		#DIV/0!		fill in ↑
	Cumulative PMI Substrate, Reagents, Solvents		#DIV/0!
	Cumulative PMI Solvents		#DIV/0!		Insert comments here ...
	Cumulative PMI Aqueous		#DIV/0!
	Cumulative PMI		#DIV/0!
	Number of chem. trans.; "0" for distillation, column, filtration, salting out, etc.:
	Intern or extern manufacturing:
	Technologies used in this sheet:
		fill in - drop down	fill in
	Step Function, Name-Number:				Inherited factors from side chains
		Value	Units		R-factor	Solvents	Aqueous
	Substrate (amount added, batch size)		kg
	Substrate (assay)		wt%
	Substrate (actual amount)	0	kg
	Molar Yield (100% if this sheet is not populated)	1
	Product-Intermediate product (amount obtained, batch yield by weight)		kg
	Product-Intermediate product (assay)		wt%
	Actual amount of product-intermediate product	0	kg
	Raw Materials	Physical Charge	Units
	Substrates (as 100%) - if more than 2 substrates, add additional ones to reagents!
		0	kg
			kg
	Reagents (as 100%)
			kg
			kg
			kg
			kg
			kg
			kg
			kg
			kg
			kg
			kg
	Total mass of substrates and reagents	0	kg
	Solvents, incl. diluents of substrates
			kg
			kg
			kg
			kg
			kg
			kg
			kg
			kg
	... aqueous
			kg
			kg
			kg
			kg
			kg
			kg
			kg
	Total input material mass	0	kg
	PROCESS STEP METRICS
	Mass Substrate (kg or g)		0
	Mass Reagents (kg or g)		0
	Mass Solvents (kg or g)		0
	Mass Aqueous (kg or g)		0
	Step R-factor		#DIV/0!		Isolated?	Purity in percent?
	Step PMI Substrate, Reagents, Solvents		#DIV/0!
	Step PMI Solvents		#DIV/0!		fill in ↑	fill in ↑
	Step PMI Aqueous		#DIV/0!			Batch No (PO) or Experiment Number
	Step PMI		#DIV/0!
	Cumulative R-factor		#DIV/0!		fill in ↑
	Cumulative PMI Substrate, Reagents, Solvents		#DIV/0!
	Cumulative PMI Solvents		#DIV/0!		Insert comments here ...
	Cumulative PMI Aqueous		#DIV/0!
	Cumulative PMI		#DIV/0!
	Number of chem. trans.; "0" for distillation, column, filtration, salting out, etc.:
	Intern or extern manufacturing:
	Technologies used in this sheet:
		fill in - drop down	fill in
	Step Function, Name-Number:				Inherited factors from side chains
		Value	Units		R-factor	Solvents	Aqueous
	Substrate (amount added, batch size)		kg
	Substrate (assay)		wt%
	Substrate (actual amount)	0	kg
	Molar Yield (100% if this sheet is not populated)	1
	Product-Intermediate product (amount obtained, batch yield by weight)		kg
	Product-Intermediate product (assay)		wt%
	Actual amount of product-intermediate product	0	kg
	Raw Materials	Physical Charge	Units
	Substrates (as 100%) - if more than 2 substrates, add additional ones to reagents!
		0	kg
			kg
	Reagents (as 100%)
			kg
			kg
			kg
			kg
			kg
			kg
			kg
			kg
			kg
			kg
	Total mass of substrates and reagents	0	kg
	Solvents, incl. diluents of substrates
			kg
			kg
			kg
			kg
			kg
			kg
			kg
			kg
	... aqueous
			kg
			kg
			kg
			kg
			kg
			kg
			kg
	Total input material mass	0	kg
	PROCESS STEP METRICS
	Mass Substrate (kg or g)		0
	Mass Reagents (kg or g)		0
	Mass Solvents (kg or g)		0
	Mass Aqueous (kg or g)		0
	Step R-factor		#DIV/0!		Isolated?	Purity in percent?
	Step PMI Substrate, Reagents, Solvents		#DIV/0!
	Step PMI Solvents		#DIV/0!		fill in ↑	fill in ↑
	Step PMI Aqueous		#DIV/0!			Batch No (PO) or Experiment Number
	Step PMI		#DIV/0!
	Cumulative R-factor		#DIV/0!		fill in ↑
	Cumulative PMI Substrate, Reagents, Solvents		#DIV/0!
	Cumulative PMI Solvents		#DIV/0!		Insert comments here ...
	Cumulative PMI Aqueous		#DIV/0!
	Cumulative PMI		#DIV/0!
	Number of chem. trans.; "0" for distillation, column, filtration, salting out, etc.:
	Intern or extern manufacturing:
	Technologies used in this sheet:

## Sheet: Data Analysis
Materials	Reference material for env. footprints	LCA-Data Scenario according to footprint method manuscript; M. U. Luescher, F. Gallou, 2024	Reference material for env. Footprints [Location] (GLO = Global, RER = Region Europe, RoW = Rest of World)	UUID	Sigma Aldrich List Price [USD] Sept. 28, 2023	Amt.	Unit	δ [g cm-3] 1 as default for solids	MW	Sigma Aldrich List Price [USD kg-1] Sept. 28, 2023	Comments Price	Sigma Aldrich Product No., Desription Sept. 28, 2023	CAS	Acidification EF v3.1 no LT mol H+ eq	Climate change EF v3.1 no LT GWP100 Years (Prod. (+ Market)) kg CO2 eq	Climate change EF v3.1 no LT GWP100 Years (Incineration) kg CO2 eq	Climate change EF v3.1 no LT GWP100 Years (Total) kg CO2 eq	Ecotoxicity, freshwater EF v3.1 no LT CTUe	Energy resources, non-renewable EF v3.1 no LT MJ eq	Eutrophication, freshwater EF v3.1 no LT kg P eq	Eutrophication, marine EF v3.1 no LT kg N eq	Eutrophication, terrestrial EF v3.1 no LT molc N eq	Human toxicity EF v3.1 no LT Carcinogenic CTUh	Human toxicity EF v3.1 no LT Non-Carcinogenic CTUh	Ionizing radiation EF v3.1 no LT kg U235 eq	Land use EF v3.1 no LT Pt	Material resources EF v3.1 no LT Minerals, metals kg Sb eq	Ozone depletion EF v3.1 no LT ODP100 Years kg CFC-11 eq	Particulate matter EF v3.1 no LT Disease incidence	Photochem. ozone formation EF v3.1 no LT kg NMVOC eq	Water use EF v3.1 no LT m3 deprived		Garg OL 2013 cPMI without given material	Garg OL 2013 cPMI of given material	Costs of material needed to prepare one kg final product [USD]	Acidification EF v3.1 no LT mol H+ eq	Climate change EF v3.1 no LT GWP100 Years (Prod.n (+ Market)) kg CO2 eq	Climate change EF v3.1 no LT GWP100 Years (Incineration) kg CO2 eq	Climate change EF v3.1 no LT GWP100 Years (Total) kg CO2 eq	Ecotoxicity, freshwater EF v3.1 no LT CTUe	Energy resources, non-renewable EF v3.1 no LT MJ eq	Eutrophication, freshwater EF v3.1 no LT kg P eq	Eutrophication, marine EF v3.1 no LT kg N eq	Eutrophication, terrestrial EF v3.1 no LT molc N eq	Human toxicity EF v3.1 no LT Carcinogenic CTUh	Human toxicity EF v3.1 no LT Non-Carcinogenic CTUh	Ionizing radiation EF v3.1 no LT kg U235 eq	Land use EF v3.1 no LT Pt	Material resources EF v3.1 no LT Minerals, metals kg Sb eq
																																	532.372
NiCl2	market for nickel, class 1	-	GLO	0d9d1001-6635-51b9-bc24-470161f83e97_23fccced-e1e5-421d-9abe-5b59c51a862e	230	0.25	kg	-	-	-		-	7718-54-9	2.00411	17.528	1.98573	19.5137	399.604	263.446	0.00198319	0.0327681	0.370447	3.99795e-08	5.5579e-07	2.10344	123.138	0.00218023	3.45105e-07	3.10437e-06	0.240083	75.3576		-	-	-	-	-	-	-	-	-	-	-	-	-	-	-	-	-
NiCl2	VIRGIN METAL * 0.45 for Ni content	Scenario 2	-	-	230	0.25	kg	1	129.6	920		339350-250G, 98% anhydrous	7718-54-9	0.901848	7.88759	1.98573	9.87332	179.822	118.551	0.000892438	0.0147456	0.166701	1.79908e-08	2.50106e-07	0.946549	55.4121	0.000981105	1.55297e-07	1.39697e-06	0.108037	33.9109		532.354	0.0189	17.388	0.0170449	0.149075	0.0375304	0.186606	3.39863	2.24061	1.68671e-05	0.000278693	0.00315065	3.40026e-10	4.72699e-09	0.0178898	1.04729	1.85429e-05
Ethanol	market for ethanol, without water, in 99.7% solution state, from fermentation	Scenario 1	GLO	3226d665-ecfc-502d-ae2f-3b4959e2b1a7_508155f4-0601-4a0b-be0f-9ac7d558605a	1830	200	L	0.789	46.068	11.597		187380-200L, reagent grade	64-17-5	0.0154307	1.10617	2.47717	3.58334	203.301	10.6559	0.00020154	0.00912684	0.0632293	7.76362e-09	1.25467e-07	0.0151282	84.5353	7.27468e-06	5.13143e-08	1.12643e-07	0.00596805	6.52368		532.101	0.271	3.14278	0.00418173	0.299773	0.671312	0.971085	55.0946	2.88774	5.46173e-05	0.00247337	0.0171351	2.10394e-09	3.40017e-08	0.00409975	22.9091	1.97144e-06
Methanol	market for methanol	Scenario 1	GLO	e1f15039-1a5d-547d-bfa7-c245e47a8d92_4a0b47d3-c643-4b67-841b-b5689787f7a1	393	18	L	0.792	32.04	27.5673		179957-18L-CS, Laboratory Reagent, ≥99.6%	67-56-1	0.00198936	0.76443	2.47717	3.2416	2.39383	32.4024	1.84897e-05	0.000532315	0.00587329	2.75455e-10	3.90987e-09	0.00545605	1.00887	1.91052e-06	4.81443e-08	1.20109e-08	0.00423524	0.213269		532.236	0.136	3.74916	0.000270553	0.103962	0.336895	0.440857	0.32556	4.40673	2.5146e-06	7.23949e-05	0.000798767	3.74618e-11	5.31742e-10	0.000742022	0.137206	2.59831e-07
n-Hexane	market for hexane	Scenario 1	GLO	c54024dc-03bc-5d1e-843b-2793490b9bf9_039d3944-e16b-4baf-8153-35752757a05d	851	18	L	0.661	86.18	71.5246		208752-18L-CS, Laboratory Reagent, ≥95%	110-54-3	0.00400987	0.792299	2.47717	3.26947	19.332	39.6465	1.23233e-05	0.000805979	0.00786972	3.84109e-10	9.76051e-09	0.00836121	3.55361	6.11978e-06	4.9702e-08	3.24057e-08	0.00823148	0.366922		437.06	95.3128	6817.21	0.382192	75.5162	236.106	311.622	1842.59	3778.82	0.00117457	0.0768201	0.750085	3.66105e-08	9.30301e-07	0.79693	338.704	0.000583293
Tetrahydrofuran	market for tetrahydrofuran	Scenario 1	GLO	af481436-e45e-599c-a101-4e5e17e54bbf_f75d6f52-d4fa-4c96-b48e-1ec2f4115f27	786	18	L	0.888	72.11	49.1742		178810-18L-CS, ReagentPlus®, ≥99.0%, contains 250 ppm BHT as inhibitor	109-99-9	0.030875	6.16905	2.47717	8.64622	17.9127	103.264	0.000229337	0.00521359	0.0583742	4.58141e-09	6.49618e-08	0.193513	20.9048	3.63048e-05	1.33175e-07	3.37025e-07	0.0234963	13.9249		519.093	13.279	652.984	0.409989	81.9189	32.8943	114.813	237.862	1371.24	0.00304537	0.0692312	0.775151	6.08366e-08	8.62627e-07	2.56965	277.595	0.000482092
Diethyl ether	market for diethyl ether, without water, in 99.95% solution state	Scenario 1	RoW	ee760675-b678-5696-af94-cb88cfedfe53_86f356ee-4bfa-43cf-a82f-4799c7f7c776	2440	200	L	0.713	74.12	17.1108		673811-200L, anhydrous, ACS reagent, ≥99.0%, contains BHT as inhibitor	60-29-7	0.0534601	5.8891	2.47717	8.36626	52.1467	131.531	0.000978139	0.00577822	0.0655799	3.73204e-09	2.45961e-07	0.140885	18.819	0.000188973	1.30471e-06	3.9741e-07	0.0281567	5.17152		466.179	66.1937	1132.63	3.53873	389.821	163.973	553.794	3451.78	8706.53	0.0647467	0.382482	4.34097	2.47038e-07	1.62811e-05	9.32569	1245.7	0.0125088
Magnesium sulfate	market for magnesium sulfate	Scenario 1	GLO	f9038bd0-e9f7-581a-8c77-b091698dcc76_0b9fafd6-2b18-4ec6-a155-26ce0685cffc	368	12	kg	1	120.366	30.6667		208094-12KG, anhydrous, reagent grade, ≥97%	7487-88-9	0.00915543	1.10943	1.98573	3.09516	16.8918	13.8902	6.31789e-05	0.002774	0.0298311	6.44544e-10	2.53831e-08	0.011157	3.55682	1.52071e-05	5.54213e-08	7.16375e-08	0.00826776	0.265123		529.12	3.2525	99.7433	0.029778	3.60842	6.4586	10.067	54.9407	45.1778	0.000205489	0.00902244	0.0970256	2.09638e-09	8.25586e-08	0.0362882	11.5685	4.94611e-05
t-Amyl alcohol	market for 2-methyl-2-butanol	Scenario 1	GLO	b439ee40-fb4e-58a2-a696-7643a02d1689_11bd64cc-4415-44e4-8cf0-edde6adc6b46	801	18	L	0.815	88.15	54.6012		152463-18L, ReagentPlus®, 99%	75-85-4	0.0178901	3.11823	2.47717	5.5954	13.486	88.4552	7.04978e-05	0.00265204	0.0295633	8.34127e-10	2.26402e-08	0.0176874	11.9023	9.414e-06	2.69984e-08	2.6263e-07	0.0142795	3.39937		521.359	11.0135	601.351	0.197033	34.3426	27.2823	61.6249	148.528	974.202	0.000776427	0.0292082	0.325595	9.18665e-09	2.49348e-07	0.1948	131.086	0.000103681
Pd(OAc)2	market for palladium	-	GLO	3f5cf5c8-ed45-52d0-8937-856828aefa45_1d6a1b9e-c272-48f9-81b3-7057c2955688	7290	0.1	kg	-	-	-		-	-	2277.66	11289.4	1.98573	11291.4	229970	168375	1.13298	55.8605	832.288	6.88161e-06	0.000324145	238.71	90607.8	0.757625	0.000104103	0.00296518	303.801	3025.49		-	-	-	-	-	-	-	-	-	-	-	-	-	-	-	-	-
Pd(OAc)2	VIRGIN METAL * 0.42 for Pd content	Scenario 2	-	-	7290	0.1	kg	1	224.5	72900		205869-100G, reagent grade, 98%	3375-31-3	956.618	4741.54	1.98573	4743.52	96587.6	70717.3	0.475853	23.4614	349.561	2.89028e-06	0.000136141	100.258	38055.3	0.318203	4.37234e-05	0.00124538	127.596	1270.71		-	-	-	-	-	-	-	-	-	-	-	-	-	-	-	-	-
Water	market for water, deionised	Scenario 1	RoW	acef6928-2d98-55ad-ab61-982efad75546_360e2eb0-f81c-4e4b-ba6b-c7a690f31275	601	200	L	0.997	18.0153	3.01404		8483339200, for synthesis	7732-18-5	4.40682e-06	0.000467456	0.628	0.628467	0.0520482	0.00553618	2.08438e-08	4.415e-07	4.97783e-06	5.14945e-13	1.9678e-11	1.42718e-05	0.00203496	2.05259e-08	2.21425e-10	3.35784e-11	1.68238e-06	0.000331622		380.959	151.413	456.365	0.000667251	0.070779	95.0874	95.1581	7.88078	0.838249	3.15603e-06	6.68488e-05	0.000753709	7.79693e-11	2.9795e-09	0.00216094	0.308119	3.10788e-06
Hydrochloric acid	market for hydrochloric acid, without water, in 30% solution state	Scenario 1	RoW	128aebdb-14c9-5237-823c-f79142341b35_3ab60559-40d3-42e4-9cac-476a519098fa	2330	200	L	1.19	36.46	264.592	Price for pure HCl	1003179200, fuming 37%, for analysis EMSURE® ACS,ISO,Reag. Ph Eur	7647-01-0	0.00632283	0.835063	2.47717	3.31223	9.70777	11.0105	4.23635e-05	0.000908805	0.00976654	1.56844e-09	2.36136e-08	0.0272865	3.19449	2.70377e-05	2.56826e-07	5.38285e-08	0.00305812	0.720193		529.468	2.9048	768.588	0.0183665	2.42569	7.19567	9.62136	28.1991	31.9833	0.000123057	0.0026399	0.0283698	4.556e-09	6.85929e-08	0.0792619	9.27936	7.8539e-05
n-Butyl lithium	sum of bellows materials for env. Footprint	Scenario 3	-	-	1290	8	L	0.69	64.06	1006.87	Price for pure nBuLi	230707-8L, 2.5 M in hexanes	109-72-8	0.631117	86.2911	2.47717	88.7682	1601.02	1031.33	0.0595455	0.20993	1.20934	4.92706e-08	1.75921e-06	2.39191	325.387	0.00147788	4.47934e-06	5.54448e-06	0.336383	176.93		530.777	1.5959	1606.86	1.0072	137.712	3.95331	141.665	2555.07	1645.9	0.0950287	0.335027	1.92999	7.8631e-08	2.80752e-06	3.81725	519.285	0.00235854
	market for methyl iodide	-	GLO	118cef6b-e835-5ff5-8236-6fbe845ba170_1c38240e-a51d-4a2a-ac56-93637c1076c4	-	-	-	-	-	-		-	-	0.0265173	6.74131	-	-	211.423	93.7143	0.0443498	0.00447029	0.0488713	2.19147e-09	5.49607e-08	0.132315	15.1242	3.4332e-05	5.4017e-07	2.82564e-07	0.019546	136.533		-	-	-	-	-	-	-	-	-	-	-	-	-	-	-	-	-
	market for lithium	-	GLO	52a3f6a2-e195-5675-909a-168a9730e6bc_787e03e9-2909-4799-9df3-010d7c3f3fbf	-	-	-	-	-	-		-	-	0.6046	79.5498	-	-	1389.6	937.618	0.0151957	0.20546	1.16047	4.70791e-08	1.70425e-06	2.2596	310.262	0.00144354	3.93917e-06	5.26192e-06	0.316837	40.3969		-	-	-	-	-	-	-	-	-	-	-	-	-	-	-	-	-
Tripotassium phosphate	market for sodium phosphate	Scenario 2	RoW	1f3a338f-ba82-5666-b814-c19f8f0cbbbc_2fc288b5-3414-4086-9658-84fd71ebf6ac	562	10	kg	1	212.27	56.2		P5629-10KG, reagent grade, ≥98%	7778-53-2	0.0394686	2.82683	1.98573	4.81257	38.9769	20.371	0.00012443	0.00249082	0.0344897	5.92663e-09	1.51539e-07	0.0581318	60.2473	0.000116764	4.17753e-08	2.31922e-07	0.0099783	5.71575		524.627	7.745	435.269	0.305684	21.8938	15.3795	37.2733	301.876	157.773	0.00096371	0.0192914	0.267123	4.59018e-08	1.17367e-06	0.450231	466.615	0.000904334
Silica gel	market for activated silica	Scenario 2	GLO	1d3438c5-b6f0-584d-b25c-5107904c1fac_aef8dfb0-f2a7-4ce6-9559-afe913243fc3	916	25	kg	1	60.08	36.64		1115679025, for column chromatography (0.040-0.063 mm)	112926-00-8	0.0234985	2.10816	1.98573	4.09389	28.9678	23.8503	7.89188e-05	0.00202344	0.0280729	1.7371e-09	8.49342e-08	0.0318417	11.5035	9.1929e-05	2.85912e-08	1.88723e-07	0.00811189	1.30443		502.372	30	1099.2	0.704954	63.2448	59.572	122.817	869.033	715.51	0.00236756	0.0607031	0.842186	5.21131e-08	2.54802e-06	0.955251	345.104	0.00275787
Ethyl acetate	market for ethyl acetate	Scenario 1	GLO	8531287f-567b-5f5e-9c51-59f5717a6be8_1a71f77c-edaa-4365-a192-f54ac538d033	4000	200	L	0.902	88.11	22.1729		319902-200L, ACS reagent, ≥99.5%	141-78-6	0.0166328	3.2263	2.47717	5.70347	25.4324	72.294	0.000294559	0.0028773	0.0319209	1.27297e-09	4.11874e-08	0.0593801	10.2985	2.22293e-05	5.56385e-08	1.62568e-07	0.0156348	2.21576		398.217	134.155	2974.62	2.23137	432.826	332.325	765.151	3411.89	9698.62	0.0395166	0.386005	4.28236	1.70776e-07	5.52551e-06	7.96615	1381.59	0.00298218
Sodium chloride	market for sodium chloride, powder	Scenario 1	GLO	3e7110e2-0649-5b89-ae71-1bc5afe99a04_edcfa83a-363a-4b2d-8d6a-612e32dfcdfc	862	100	kg	1	58.44	8.62		1064009103, EMPROVE® ESSENTIAL, Ph. Eur., BP, USP	7647-14-5	0.00191383	0.271592	1.98573	2.25733	2.85613	3.2917	2.45012e-05	0.000374638	0.00392881	2.72471e-10	8.48983e-09	0.00969257	1.79524	2.48482e-05	2.8341e-09	1.87435e-08	0.00117056	0.147514		529.173	3.1996	27.5806	0.00612349	0.868984	6.35355	7.22254	9.13847	10.5321	7.83939e-05	0.00119869	0.0125706	8.71798e-10	2.71641e-08	0.0310124	5.74406	7.95042e-05
4-(Dimethylamino)pyridine	sum of bellows materials for env. Footprint	Scenario 3	-	-	572	5	kg	1	122.17	114.4		107700-5KG, ReagentPlus®, ≥99%	1122-58-3	0.0530799	12.9892	1.98573	14.9749	386.364	268.793	0.000332071	0.110761	0.12279	4.65364e-08	1.36438e-07	0.181839	25.3573	7.88338e-05	7.28033e-07	5.21195e-07	0.0484384	6.64601		-	-	-	-	-	-	-	-	-	-	-	-	-	-	-	-	-
	market for chlorine, gaseous	-	RoW	3b11c94b-b87f-5a9a-b641-1647cb5aee8b_0992e479-07eb-4837-8aa3-d4411f675dad	-	-	-	-	-	-		-	-	0.00532447	0.976431	-	-	6.16754	11.8071	5.28484e-05	0.000966246	0.0107408	4.59045e-10	1.5058e-08	0.0380751	2.91635	1.82286e-05	5.39759e-07	4.94586e-08	0.00311782	1.024		-	-	-	-	-	-	-	-	-	-	-	-	-	-	-	-	-
	market for pyridine	-	GLO	068d5e87-d6bf-53f1-8a3d-cf60d7a8e09e_c35d04b9-fc6e-4033-9144-af61a3c68526	-	-	-	-	-	-		-	-	0.0354885	8.81968	-	-	321.797	186.187	0.00019703	0.0920911	0.0789485	4.41653e-08	9.94336e-08	0.116559	16.5127	4.57369e-05	9.18629e-08	3.5869e-07	0.0331603	4.15236		-	-	-	-	-	-	-	-	-	-	-	-	-	-	-	-	-
	market for dimethylamine	-	RoW	1690406c-0838-5cd8-8f6a-58f1e2f7bb43_409fed7c-d609-44ba-901b-045059c1100d	-	-	-	-	-	-		-	-	0.0122669	3.19306	-	-	58.3997	70.7983	8.21927e-05	0.0177034	0.0331006	1.91206e-09	2.19462e-08	0.0272042	5.92825	1.48682e-05	9.64114e-08	1.13046e-07	0.0121603	1.46965		-	-	-	-	-	-	-	-	-	-	-	-	-	-	-	-	-
Triethylamine	market for triethyl amine	Scenario 1	GLO	73e1e525-1480-5616-a70e-a5fce54bae8d_af6f0e39-5637-4468-9e83-850d772bd206	722	40	kg	1	101.19	18.05		8083529040, for synthesis	121-44-8	0.0183977	3.91151	1.98573	5.89724	28.3862	86.531	0.000624682	0.00632844	0.0386049	1.52522e-09	3.46105e-08	0.032916	8.22038	2.32518e-05	3.50241e-08	1.51227e-07	0.0171943	1.82197		-	-	-	-	-	-	-	-	-	-	-	-	-	-	-	-	-
Sodium sulfate	market for sodium sulfate, anhydrite	Scenario 1	RoW	71fb87c3-1097-556d-8827-f10f28135e2b_2cfef82e-cb0d-4864-8163-9651fc6c25eb	643	25	kg	1	142.04	25.72		746363-25KG, anhydrous, free-flowing, Redi-Dri™, ACS reagent, ≥99%	7757-82-6	0.00879487	0.596723	1.98573	2.58246	11.4803	7.06884	3.52672e-05	0.000843295	0.00942998	7.02365e-10	3.51927e-08	0.0146402	7.28769	5.30281e-05	2.27117e-08	7.32461e-08	0.00307112	0.678472		-	-	-	-	-	-	-	-	-	-	-	-	-	-	-	-	-
Dichloromethane	market for dichloromethane	Scenario 1	RoW	94ff8fc2-982f-5956-aa79-b8f4f5de305b_c1fd4059-c24f-4e05-b3f5-82651ec0dbfa	5190	190	L	1.33	84.93	20.5382		1060509190, for analysis EMSURE® ACS,ISO,Reag. Ph Eur	75-09-2	0.027516	3.58217	2.47717	6.05933	57.9368	38.6558	2.69631e-06	0.00549181	0.0601295	9.56053e-10	6.75245e-08	0.00016367	0.213164	2.00543e-05	4.89104e-05	5.44595e-07	0.0164514	0.451733		-	-	-	-	-	-	-	-	-	-	-	-	-	-	-	-	-
Aluminium oxide	market for aluminium oxide, non-metallurgical	Scenario 2	RoW	61198d66-25b8-54b6-8c64-93e00ab3866d_96f36f31-8f6a-48f8-921f-1d781b7a545f	684	20	kg	1	101.96	34.2		199443-20KG, activated, basic, Brockmann I	1344-28-1	0.0120784	1.50492	1.98573	3.49066	8.39145	14.5088	4.46381e-05	0.00174994	0.0195901	4.41444e-09	7.60606e-08	0.0103524	4.07047	8.60253e-06	3.96157e-08	1.76647e-07	0.00587132	0.230245		-	-	-	-	-	-	-	-	-	-	-	-	-	-	-	-	-
p-Toluenesulfonic acid monohydrate	market for naphthalene sulfonic acid	Scenario 2	GLO	a76eb288-754e-5a01-a3cb-5a573e4615cf_08342471-1d67-4cb8-b89a-e7f686900079	531	15	kg	1	190.22	35.4		T35920-15KG, ReagentPlus®, ≥98%	203-180-0	0.0143415	1.36452	1.98573	3.35025	11.046	30.4147	0.00013569	0.00146627	0.0169513	1.76328e-08	3.9062e-08	0.0326726	7.4186	3.63171e-05	8.67093e-08	1.53131e-07	0.0256399	0.636035		-	-	-	-	-	-	-	-	-	-	-	-	-	-	-	-	-
Toluene, PhMe	market for toluene, liquid	Scenario 1	RoW	9ec1af2a-e729-5443-bb4e-b428985cacf1_7856dace-7366-43e2-9f81-83d63e579efc	3950	200	L	0.867	92.14	22.7797		179418-200L, ACS reagent, ≥99.5%	108-88-3	0.00500545	1.61023	2.47717	4.0874	0.742264	60.5424	1.11108e-06	0.000970677	0.0105845	1.47006e-10	1.79539e-09	0.000420121	0.505062	1.86765e-07	1.11724e-09	6.01803e-08	0.00489193	1.51695		-	-	-	-	-	-	-	-	-	-	-	-	-	-	-	-	-
Silica sand (Celite)	market for silica sand	Scenario 2	GLO	c39f6308-b683-5d84-8392-48cd9ee731b0_c4842286-21e6-4142-bc35-f2c36f1d68a2	393	25	kg	1	60.08	15.72		419931-25KG, Celite® 545	68855-54-9	0.000323391	0.0426791	1.98573	2.02841	0.220866	0.468921	1.07984e-06	7.07802e-05	0.000779525	2.29966e-11	4.00205e-10	0.000262104	1.10474	9.28555e-08	3.81143e-10	5.62815e-09	0.000243852	0.00546715		-	-	-	-	-	-	-	-	-	-	-	-	-	-	-	-	-
Acetone	market for acetone, liquid	Scenario 1	RoW	6efb96fb-1a22-5504-9385-450b0b5658b2_15e08bcb-75e0-4f45-ab47-d6ddff721ebc	2860	200	L	0.784	58.08	18.2398		179124-200L,	67-64-1	0.00776294	1.61349	2.47717	4.09065	10.0705	39.564	5.27754e-05	0.0013469	0.0151428	2.8075e-09	1.31703e-08	0.0150305	3.07012	7.93478e-06	1.56525e-08	6.75269e-08	0.0076759	0.79456		-	-	-	-	-	-	-	-	-	-	-	-	-	-	-	-	-
Iron(III) chloride	market for iron(III) chloride, without water, in 40% solution state	Scenario 2	GLO	a2440cd6-fb9a-5cfb-8fcd-db91feb68660_51202bed-5f41-4b96-a788-9f6649dcb3c8	125	25	kg	1	162.2	5		157740-2.5KG, reagent grade, 97%	7705-08-0	0.00563168	0.811483	1.98573	2.79722	6.64823	9.93674	4.66583e-05	0.000949223	0.0107839	8.1694e-10	2.56347e-08	0.0307974	4.70763	3.17672e-05	3.36428e-07	4.87876e-08	0.00318584	0.690829		-	-	-	-	-	-	-	-	-	-	-	-	-	-	-	-	-
Methylmagnesium chloride	sum of bellows materials for env. Footprint	Scenario 3	-	-	1340	8	L	1.013	74.79	718.679	Price for pure MeMgCl	189901-8L, 3.0 M in THF	676-58-4	0.131615	31.1288	2.47717	33.6059	142.4	390.943	0.00129059	0.0293702	0.327704	1.48216e-07	2.56341e-07	0.313798	64.3478	6.60128e-05	9.54844e-06	2.1382e-05	0.154309	3.3226		-	-	-	-	-	-	-	-	-	-	-	-	-	-	-	-	-
	market for methylchloride	-	RoW	e3d476a3-3323-5520-81d1-da29efadf106_07a9af51-381d-46b0-8ee1-1a494950a39a	-	-	-	-	-	-		-	-	0.0258573	3.21133	-	-	58.2709	45.383	3.64149e-06	0.00523002	0.0572538	9.03694e-10	6.76058e-08	0.000432615	0.544288	1.72957e-05	8.76101e-06	5.38829e-07	0.0165215	0.376142		-	-	-	-	-	-	-	-	-	-	-	-	-	-	-	-	-
	market for magnesium	-	GLO	a849f6f6-dd9e-5349-9aff-fe7b5393d009_1d344632-354d-4d3f-9f6c-da038a3bd491	-	-	-	-	-	-		-	-	0.105758	27.9174	-	-	84.1289	345.56	0.00128695	0.0241402	0.27045	1.47313e-07	1.88735e-07	0.313365	63.8035	4.87171e-05	7.87434e-07	2.08431e-05	0.137788	2.94645		-	-	-	-	-	-	-	-	-	-	-	-	-	-	-	-	-
Pentane	market for pentane	Scenario 1	GLO	33edb65d-3de6-58a5-9f09-155fb910827d_a300dfb2-454a-4bb1-aabc-257cc84994c3	630	18	L	0.626	72.15	55.9105		158941-18L-CS, reagent grade, 98%	109-66-0	0.00522952	1.14654	2.47717	3.62371	0.687779	79.6252	2.8795e-06	0.00097934	0.0107064	1.09666e-10	2.2164e-09	0.00163606	0.435016	9.54446e-07	8.45999e-09	6.60508e-08	0.00624382	0.081135		-	-	-	-	-	-	-	-	-	-	-	-	-	-	-	-	-
Tricyclohexylphosphine	market for solvent, organic	Scenario 4	GLO	8ffe142c-26b7-5984-805f-b21e828f3d0d_c6c77fb4-9850-4849-be9e-71fc9656bc03	708	0.25	kg	1	280.43	2832		261971-250G	2622-14-2	0.00555995	1.11534	1.98573	3.10107	26.3458	54.3797	1.74813e-05	0.00112017	0.0109922	5.82975e-10	1.36641e-08	0.0116363	4.99678	8.45441e-06	2.42651e-07	4.75262e-08	0.0112418	0.515217		532.324	0.0481	136.219	0.000267434	0.0536477	0.0955138	0.149162	1.26723	2.61566	8.40853e-07	5.38803e-05	0.000528726	2.80411e-11	6.57241e-10	0.000559706	0.240345	4.06657e-07
Triisopropylborate	market for trimethyl borate	Scenario 2	GLO	9382fc86-ac66-5b23-93f9-4187f0387241_73ba2ae4-7316-43af-86f5-89675d660f40	537	2	kg	1	188.07	268.5		197335-2KG, ≥98%	5419-55-6	0.0209011	2.89666	1.98573	4.88239	15.5471	58.3764	8.06985e-05	0.00303392	0.0340509	1.59886e-09	6.5598e-08	0.033015	9.16076	0.000957791	7.74831e-08	1.5587e-07	0.0141268	0.897881		527.685	4.687	1258.46	0.0979633	13.5766	9.30714	22.8838	72.8695	273.61	0.000378234	0.01422	0.159596	7.49386e-09	3.07458e-07	0.154741	42.9365	0.00448917
Succinic anhydride	average of bellows materials	Scenario 2	-	-	1600	50	kg	1	100.07	32		8006839050, for synthesis	108-30-5	0.0119644	3.47969	1.98573	5.46543	22.6046	69.5679	6.29788e-05	0.0021129	0.022647	2.85106e-09	2.10107e-08	0.0579073	6.23115	1.22265e-05	6.6157e-08	1.07793e-07	0.0118795	0.780811		-	-	-	-	-	-	-	-	-	-	-	-	-	-	-	-	-
	market for succinic acid	-	GLO	df414346-bcf8-556b-9155-5112f32122c0_c0c2439d-115d-5846-b0dc-7fc716f3862e	-	-	-	-	-	-		-	-	0.0132006	3.74312	-	-	22.7675	70.3055	7.22772e-05	0.00232326	0.0253179	2.93876e-09	2.56195e-08	0.0645773	7.14913	1.62843e-05	7.0086e-08	1.20562e-07	0.0123914	0.870625		-	-	-	-	-	-	-	-	-	-	-	-	-	-	-	-	-
	market for maleic anhydride	-	GLO	2cdb9cca-9d7a-50a9-9ff7-d168c6f8ab3b_4c2b6470-79f6-40e4-b6c0-08a769c9ab04	-	-	-	-	-	-		-	-	0.0107282	3.21627	-	-	22.4417	68.8303	5.36803e-05	0.00190253	0.0199761	2.76336e-09	1.64019e-08	0.0512372	5.31316	8.1687e-06	6.2228e-08	9.50244e-08	0.0113677	0.690998		-	-	-	-	-	-	-	-	-	-	-	-	-	-	-	-	-
MPEG 750	market for non-ionic surfactant	Scenario 2	GLO	bef1e2ff-86ff-5368-9aae-dd21c1138248_3fc068d9-71cf-5f55-8e15-1675bbc38caf	195	0.5	kg	1	unk	390		202495-500G, average Mn 750	9004-74-4	0.0194215	4.08266	1.98573	6.06839	104.63	60.6303	0.000194876	0.0135759	0.057302	6.97565e-09	5.51717e-08	0.0637827	112.271	2.6175e-05	2.80629e-08	2.08059e-07	0.0186042	8.26		-	-	-	-	-	-	-	-	-	-	-	-	-	-	-	-	-
Sodium hydroxide	market for sodium hydroxide, without water, in 50% solution state	Scenario 2	GLO	b84f5014-de3c-5aab-9bb2-f5596b330018_61396bcb-bf35-411a-a6a6-8543ccef83e8	1310	50	kg	1	40	26.2		221465-50KG, ACS reagent, ≥97.0%, pellets	1310-73-2	0.00729005	1.29059	1.98573	3.27632	8.24849	16.6121	7.26581e-05	0.0013747	0.0152688	6.77891e-10	2.39832e-08	0.062638	4.40125	2.49793e-05	7.4013e-07	6.58531e-08	0.00446992	1.40344		530.578	1.7944	47.0133	0.0130813	2.31584	3.5632	5.87904	14.8011	29.8088	0.000130378	0.00246676	0.0273983	1.21641e-09	4.30354e-08	0.112398	7.8976	4.48228e-05
2-Bromochlorobenzene	sum of bellows materials for env. Footprint	Scenario 3	-	-	92.6	0.1	kg	1	191.45	926		B60401-100G, 99%	694-80-4	0.034735	8.26591	1.98573	10.2516	355.295	140.997	0.000203941	0.00542216	0.0598514	4.45113e-08	1.065e-07	0.106569	13.4396	5.01586e-05	9.40032e-07	3.81832e-07	0.0341867	21.6315		-	-	-	-	-	-	-	-	-	-	-	-	-	-	-	-	-
	market for bromine	-	GLO	3b3ff70a-0f35-5f1c-879e-018d7b38b626_c16db903-a356-4c17-9775-1ce1c4aa4e0b	-	-	-	-	-	-		-	-	0.020248	5.47418	-	-	17.6805	70.6596	0.000106419	0.00300438	0.0329404	1.59921e-09	3.91634e-08	0.0613393	7.07653	2.26504e-05	4.13648e-07	2.22876e-07	0.0136422	19.5348		-	-	-	-	-	-	-	-	-	-	-	-	-	-	-	-	-
	market for monochlorobenzene	-	RoW	aea9642c-5006-5c5d-aa7a-df632280489b_0f04185b-5bd5-47c6-b259-c101f5ff47b5	-	-	-	-	-	-		-	-	0.014487	2.79173	-	-	337.615	70.3371	9.7522e-05	0.00241778	0.026911	4.29121e-08	6.73363e-08	0.0452292	6.36302	2.75082e-05	5.26384e-07	1.58956e-07	0.0205444	2.09675		-	-	-	-	-	-	-	-	-	-	-	-	-	-	-	-	-
1.3-Dimethoxybenzene	sum of bellows materials for env. Footprint	Scenario 3	-	-	762	10	kg	1	138.16	76.2		W238503-10KG-K, ≥98%, FG	151-10-0	0.0806147	15.2576	1.98573	17.2433	332.98	252.755	0.000352884	0.100079	0.103192	1.19144e-08	1.55859e-07	0.191717	23.1315	0.000124791	7.76616e-07	6.98873e-07	0.0499465	6.82212		-	-	-	-	-	-	-	-	-	-	-	-	-	-	-	-	-
	market for resorcinol	-	GLO	2fd69980-ce33-58ce-924a-5164322dd622_0848beac-bbcb-4791-b34a-c721d9a3a3fd	-	-	-	-	-	-		-	-	0.0621451	13.8276	-	-	319.987	222.174	0.000288704	0.0986142	0.0862703	1.04274e-08	7.67583e-08	0.156323	17.0883	4.26113e-05	7.38689e-07	5.84848e-07	0.0425759	5.07245		-	-	-	-	-	-	-	-	-	-	-	-	-	-	-	-	-
	market for dimethyl sulfate	-	RoW	c8e7757a-bb60-5af4-a443-9f31bd58e2ba_5b808359-1aed-4a46-aba5-993226763791	-	-	-	-	-	-		-	-	0.0184696	1.42999	-	-	12.9932	30.5817	6.418e-05	0.00146451	0.0169221	1.48701e-09	7.91008e-08	0.0353939	6.04319	8.21796e-05	3.79267e-08	1.14025e-07	0.00737053	1.74967		-	-	-	-	-	-	-	-	-	-	-	-	-	-	-	-	-
Chlorodicyclohexylphosphine	sum of bellows materials for env. Footprint	Scenario 3	-	-	272	0.005	kg	1	232.73	54400		481408-5G, 97%	16523-54-9	0.162334	40.55	1.98573	42.5357	127.831	558.567	0.0139695	0.033979	0.377205	1.58799e-07	2.97242e-07	0.707492	110.506	0.000117462	1.74165e-06	2.14486e-05	0.182082	26.1702		-	-	-	-	-	-	-	-	-	-	-	-	-	-	-	-	-
	market for bromine	-	GLO	3b3ff70a-0f35-5f1c-879e-018d7b38b626_c16db903-a356-4c17-9775-1ce1c4aa4e0b	-	-	-	-	-	-		-	-	0.020248	5.47418	-	-	17.6805	70.6596	0.000106419	0.00300438	0.0329404	1.59921e-09	3.91634e-08	0.0613393	7.07653	2.26504e-05	4.13648e-07	2.22876e-07	0.0136422	19.5348		-	-	-	-	-	-	-	-	-	-	-	-	-	-	-	-	-
	market for cyclohexane	-	GLO	920dbf93-28a4-5ddf-93de-5877f1442f41_faff01b2-d18a-4432-a850-a9e54cc64e7a	-	-	-	-	-	-		-	-	0.0118132	2.45271	-	-	5.26541	73.2944	5.93599e-05	0.00184663	0.0205316	8.07219e-09	1.3369e-08	0.0118702	4.35811	9.26361e-06	5.7621e-08	1.44376e-07	0.0114999	1.56541		-	-	-	-	-	-	-	-	-	-	-	-	-	-	-	-	-
	market for magnesium	-	GLO	a849f6f6-dd9e-5349-9aff-fe7b5393d009_1d344632-354d-4d3f-9f6c-da038a3bd491	-	-	-	-	-	-		-	-	0.105758	27.9174	-	-	84.1289	345.56	0.00128695	0.0241402	0.27045	1.47313e-07	1.88735e-07	0.313365	63.8035	4.87171e-05	7.87434e-07	2.08431e-05	0.137788	2.94645		-	-	-	-	-	-	-	-	-	-	-	-	-	-	-	-	-
	market for phosphorus trichloride	-	GLO	41b3f041-dfbb-5df8-b93c-65ae55d11c37_f83172e9-3aac-50f1-965f-8eae38b5fea5	-	-	-	-	-	-		-	-	0.024515	4.70564	-	-	20.7558	69.0531	0.0125168	0.0049878	0.0532829	1.81496e-09	5.59746e-08	0.320918	35.2683	3.68308e-05	4.82945e-07	2.3822e-07	0.0191523	2.12356		-	-	-	-	-	-	-	-	-	-	-	-	-	-	-	-	-
3-Bromothiophene	sum of bellows materials for env. Footprint	Scenario 3	-	-	160	0.1	kg	1	163.04	1600		106224-100G, 97%	872-31-1	0.0494749	6.7553	1.98573	8.74103	22.8481	129.77	0.00013204	0.0041013	0.0450884	2.31815e-09	5.25378e-08	0.0770247	10.5869	3.18114e-05	4.96591e-07	4.23958e-07	0.0230333	19.7045		528.31	4.0624	6499.84	0.200987	27.4427	8.06685	35.5096	92.8181	527.176	0.0005364	0.0166611	0.183167	9.41727e-09	2.1343e-07	0.312905	43.0081	0.000129231
	market for butane	-	GLO	d7c090a7-8844-5e54-ad02-ff5e250dbe54_aaa1fb85-4e0e-426e-808a-35987bd8d486	-	-	-	-	-	-		-	-	0.00469847	1.09663	-	-	3.83172	56.7292	2.44776e-05	0.000946793	0.0105428	6.71285e-10	1.24317e-08	0.0152724	3.2883	8.74991e-06	8.02226e-08	4.69177e-08	0.00725973	0.158203		-	-	-	-	-	-	-	-	-	-	-	-	-	-	-	-	-
	market for bromine	-	GLO	3b3ff70a-0f35-5f1c-879e-018d7b38b626_c16db903-a356-4c17-9775-1ce1c4aa4e0b	-	-	-	-	-	-		-	-	0.020248	5.47418	-	-	17.6805	70.6596	0.000106419	0.00300438	0.0329404	1.59921e-09	3.91634e-08	0.0613393	7.07653	2.26504e-05	4.13648e-07	2.22876e-07	0.0136422	19.5348		-	-	-	-	-	-	-	-	-	-	-	-	-	-	-	-	-
	market for sulfur	-	GLO	55d9b01f-18f1-5d1d-a841-973075319cca_fe8e025f-14c8-4abd-86df-1797ab26d3db	-	-	-	-	-	-		-	-	0.0245285	0.184489	-	-	1.33591	2.38091	1.14356e-06	0.000150127	0.00160521	4.76605e-11	9.42723e-10	0.000412912	0.222047	4.11069e-07	2.72042e-09	1.54164e-07	0.00213136	0.0115251		-	-	-	-	-	-	-	-	-	-	-	-	-	-	-	-	-
5-Bromopyrimidine	sum of bellows materials for env. Footprint	Scenario 3	-	-	82	0.025	kg	1	158.98	3280		219142-25G, 97%	4595-59-9	0.178291	20.3571	1.98573	22.3429	584.23	281.897	0.00929235	0.0263402	0.187387	1.91694e-08	3.14816e-07	0.524589	53.8765	0.000248762	8.71622e-06	1.50396e-06	0.0737096	37.5707		531.083	1.2891	4228.25	0.229834	26.2424	2.55981	28.8022	753.131	363.393	0.0119788	0.0339552	0.241561	2.47112e-08	4.05829e-07	0.676247	69.4523	0.000320679
	market for diazine-compound	-	GLO	bf4cc76f-85dd-5bbd-9e7c-e9e41053c033_99a11618-31ec-49b6-afe6-4bb57c1c5d9b	-	-	-	-	-	-		-	-	0.158043	14.883	-	-	566.549	211.237	0.00918594	0.0233358	0.154447	1.75702e-08	2.75653e-07	0.463249	46.8	0.000226111	8.30257e-06	1.28109e-06	0.0600674	18.0359		-	-	-	-	-	-	-	-	-	-	-	-	-	-	-	-	-
	market for bromine	-	GLO	3b3ff70a-0f35-5f1c-879e-018d7b38b626_c16db903-a356-4c17-9775-1ce1c4aa4e0b	-	-	-	-	-	-		-	-	0.020248	5.47418	-	-	17.6805	70.6596	0.000106419	0.00300438	0.0329404	1.59921e-09	3.91634e-08	0.0613393	7.07653	2.26504e-05	4.13648e-07	2.22876e-07	0.0136422	19.5348		-	-	-	-	-	-	-	-	-	-	-	-	-	-	-	-	-
Tocopherol	sum of bellows materials for env. Footprint	Scenario 3	-	-	3607	20	kg	1	430.71	180.35		5008789024, dry powder, EMPROVE® ESSENTIAL, Ph. Eur., BP	10191-41-0	0.172805	37.7708	1.98573	39.7565	183.705	767.847	0.00170777	0.0334702	0.340465	2.03868e-08	3.69466e-07	0.689032	79.3051	0.00107442	1.21962e-06	1.60807e-06	0.133571	29.2128		-	-	-	-	-	-	-	-	-	-	-	-	-	-	-	-	-
	market for ethylene oxide	-	RoW	f37305f2-09f7-56da-ba0c-358cf4ebcdf1_48396be2-470c-4a6a-b858-bec336a26b38	-	-	-	-	-	-		-	-	0.00947413	2.37886	-	-	5.33682	63.8537	5.70264e-05	0.00169237	0.018894	4.95098e-10	1.6103e-08	0.033482	2.83101	8.94655e-06	6.95045e-09	8.84603e-08	0.00768654	1.00294		-	-	-	-	-	-	-	-	-	-	-	-	-	-	-	-	-
	market for butene, mixed	-	RoW	4756644d-81b0-59a9-900f-cc2c7ad20dab_8c1de2fe-b584-49b7-9b96-d8c50ed152c4	-	-	-	-	-	-		-	-	0.00466186	1.60288	-	-	0.257629	62.4479	5.02609e-07	0.000839228	0.00916016	7.78962e-11	1.61302e-09	4.88149e-05	0.0307595	4.15754e-08	3.61187e-10	5.87717e-08	0.00450729	0.6819		-	-	-	-	-	-	-	-	-	-	-	-	-	-	-	-	-
	market for formaldehyde	-	RoW	911a57f1-ac36-586c-90c9-bc5846bceea7_ab2d6d49-c4a9-48b1-bddc-0ccb6b84e022	-	-	-	-	-	-		-	-	0.00395832	1.11	-	-	4.01283	36.4907	2.94655e-05	0.00101191	0.0112299	1.05333e-09	1.09805e-08	0.0126528	2.57594	9.04613e-06	5.24021e-08	2.81892e-08	0.00588709	0.27954		-	-	-	-	-	-	-	-	-	-	-	-	-	-	-	-	-
	market for acetylene	-	RoW	41e1ccdd-276e-528d-8eb5-318fff387f1e_ac271101-169f-43d6-913e-624d1a1b6683	-	-	-	-	-	-		-	-	0.029138	5.87973	-	-	15.6049	71.4724	0.000272611	0.00538261	0.0598354	1.55322e-09	5.64385e-08	0.233528	12.1467	1.31399e-05	3.33536e-08	2.71113e-07	0.0189213	6.09264		-	-	-	-	-	-	-	-	-	-	-	-	-	-	-	-	-
	market for acetone, liquid	-	RoW	6efb96fb-1a22-5504-9385-450b0b5658b2_15e08bcb-75e0-4f45-ab47-d6ddff721ebc	-	-	-	-	-	-		-	-	0.00776294	1.61349	-	-	10.0705	39.564	5.27754e-05	0.0013469	0.0151428	2.8075e-09	1.31703e-08	0.0150305	3.07012	7.93478e-06	1.56525e-08	6.75269e-08	0.0076759	0.79456		-	-	-	-	-	-	-	-	-	-	-	-	-	-	-	-	-
	market for trichloroborane	-	GLO	89e32c2d-47ce-5d4b-85f3-716bc25e8eec_2ed5aaa9-5c79-4693-b26b-b2532b82d7b7	-	-	-	-	-	-		-	-	0.0259662	3.76528	-	-	33.4238	42.1909	0.000157957	0.00403578	0.0453598	2.06468e-09	8.44543e-08	0.130363	13.0464	0.000923518	5.36637e-07	1.9571e-07	0.0140938	2.41641		-	-	-	-	-	-	-	-	-	-	-	-	-	-	-	-	-
	market for triethyl amine	-	GLO	73e1e525-1480-5616-a70e-a5fce54bae8d_af6f0e39-5637-4468-9e83-850d772bd206	-	-	-	-	-	-		-	-	0.0183977	3.91151	-	-	28.3862	86.531	0.000624682	0.00632844	0.0386049	1.52522e-09	3.46105e-08	0.032916	8.22038	2.32518e-05	3.50241e-08	1.51227e-07	0.0171943	1.82197		-	-	-	-	-	-	-	-	-	-	-	-	-	-	-	-	-
	market for ammonia, anhydrous, liquid	-	RoW	58c7b066-abed-5c76-86e7-297f2533a0b7_06b8d05b-e1e6-427b-929c-bb55e84e7c08	-	-	-	-	-	-		-	-	0.00877687	3.21905	-	-	5.11558	37.0518	9.07323e-05	0.00154224	0.017496	6.11877e-10	1.4488e-08	0.00814116	6.50882	9.56959e-06	4.67688e-08	9.96815e-08	0.00656193	2.4698		-	-	-	-	-	-	-	-	-	-	-	-	-	-	-	-	-
	market for formic acid	-	RoW	87836424-42b4-5c8a-b917-a2de386ebe29_118a9202-6b68-44aa-82b5-2c2bf5bc02cf	-	-	-	-	-	-		-	-	0.0191514	3.64061	-	-	18.5422	59.8953	0.000123668	0.00323683	0.035566	1.25042e-09	3.59906e-08	0.0802577	12.1586	1.43204e-05	4.90638e-08	2.31536e-07	0.0135242	6.66161		-	-	-	-	-	-	-	-	-	-	-	-	-	-	-	-	-
	market for methyl ethyl ketone	-	RoW	f290a36e-a79f-527f-8347-e3f00e1eac30_86e1bf02-e86a-479b-9051-710271dbd745	-	-	-	-	-	-		-	-	0.0144356	2.75352	-	-	22.6171	67.6413	0.00011914	0.00245813	0.0278034	7.9595e-10	2.50594e-08	0.0189223	5.65354	1.06042e-05	2.34007e-08	9.24763e-08	0.0099709	1.27795		-	-	-	-	-	-	-	-	-	-	-	-	-	-	-	-	-
	market for ethylene carbonate	-	GLO	befd0cc8-88b8-5c92-af3b-54859f7c757e_2974c2fd-d35b-4d8b-9919-6e3996ba2674	-	-	-	-	-	-		-	-	0.00706182	1.69896	-	-	4.93045	37.0997	4.40396e-05	0.00131609	0.0141566	8.17924e-10	3.10349e-08	0.0328827	3.7441	1.66246e-05	8.48783e-09	6.57035e-08	0.00541139	0.625353		-	-	-	-	-	-	-	-	-	-	-	-	-	-	-	-	-
	market for hydrogen, liquid	-	RoW	2fca9c87-ec8a-55e8-b198-ee165ebfcb4c_8d78a0dc-1489-48c1-8bc4-7c120f318216	-	-	-	-	-	-		-	-	0.00763926	2.37314	-	-	4.35944	73.8318	3.56469e-05	0.00144854	0.0159161	3.78984e-10	1.17967e-08	0.0254003	1.96915	1.21958e-05	3.60102e-07	8.6997e-08	0.00660995	1.8771		-	-	-	-	-	-	-	-	-	-	-	-	-	-	-	-	-
	market for hydroquinone	-	GLO	e1557c0d-2fcf-52a5-aab7-18b66dc2150e_c918095d-30ff-4e4c-9243-7e69ee090cf3	-	-	-	-	-	-		-	-	0.0163813	3.82374	-	-	31.0477	89.7765	9.95216e-05	0.00283119	0.0312998	6.95467e-09	3.37265e-08	0.0654063	7.34945	2.52267e-05	5.1412e-08	1.70679e-07	0.0155263	3.21106		-	-	-	-	-	-	-	-	-	-	-	-	-	-	-	-	-
																1.98573	Liquids: Treatment of spent solvent mixture, hazardous waste incineration (RoW) UUID: 07fe2f04-3b62-575f-8920-61b3b6ed6390_cfa1d213-eeff-41a8-8744-7907cc7c4c7b																	532.372	SUM	9.39572	1314.43	1011.22	2325.65	13912.5	28343.3	0.221128	1.44188	14.2855	7.54044e-07	3.1569e-05	27.5043	4920.21	0.0278965
																0.628	Liquids (H2O): 0.628 kg according to Chimia 73 (2019) 730–736.																	cPMI in calculation (sum)
																2.47717	Solids: Treatment of hazardous waste, hazardous waste incineration (RoW) UUID: 9c0a0d94-8005-5107-920e-66d920fe416d_e5208079-1561-4537-a1f8-863db2702d0f																	532.372
																																		cPMI in paper
Figure 2 (Incineration and waste treatments not included in price)
	Ni-Cat. Reaction	Reaction using Pd-nanocat.
Reagents and Materials	5451.35	7473.04
Coupling Partners	10728.1	5396.02
Solvents	12185.7	10210.6
H2O	456.365	178.761
Metals	17.388	36.45
Total	28838.9	23294.9
Figure 6 (Relative spider diagram of enitre reaction including general coefficient for incineration included in climate change)
	Acidification	Climate Change (Prod.)	Climate Change (Inc.)	Climate Change (Tot.)	EcoTox Freshwater	Fossil Resources	Eutroph. Freshwater	Eutroph. Marine	Eutroph. Terr.	Human Tox. (carc.)	Human Tox. (non-carc.)	Ionizing Rad.	Land Use	Mineral and Metal Resources	Ozone Depletion	Particulate Matter	Ozone Formation	Water Resources
Ni-Cat. Reaction	100	100	100	100	100	100	100	100	100	100	100	100	100	100	24.4374	100	100	100
Reaction using Pd-nanocat.	63.4752	62.4646	72.4903	66.8239	66.4085	64.3879	48.9638	61.2716	63.5992	61.2963	54.0626	56.3599	58.6694	50.6097	100	67.2236	65.9548	52.7019
[truncated: 46 more columns]

[truncated: 1 more sheets: ... additional information]
